# Supplementary material for: The structural properties of DNA regulate gene expression
Source: Royal Society of Chemistry journal article supplement (doi:10.1039/c3mb70311h), 2013-11-27
Supplement: c3mb70311h.xlsx [file c3mb70311h.xlsx]

## Sheet: table.1
Table 1. States of estimation model. In dinucleotide invariants (the states 1 to 8) the three calculated AFEs from their 60nt were equal so they were spotted as one state but for trinucleotide invariants (the states 9 to 20) each one of three calculated AFEs was spotted as distinct states (see methods). The GC and CG invariants were not considered as hidden states due to very low energy and non-o…
Invariants Sequences	60 bp Polymers	20 bp parts		States
AA	AAAAAAAAAAAAAAAAAAAAAAAAAAAAAAAAAAAAAAAAAAAAAAAAAAAAAAAAAAAA	1	-19.38	1
		1
		3
TT	TTTTTTTTTTTTTTTTTTTTTTTTTTTTTTTTTTTTTTTTTTTTTTTTTTTTTTTTTTTT	1	-19.38	1
		2
		3
GG	GGGGGGGGGGGGGGGGGGGGGGGGGGGGGGGGGGGGGGGGGGGGGGGGGGGGGGGGGGGG	1	-33.63	2
		2
		3
CC	CCCCCCCCCCCCCCCCCCCCCCCCCCCCCCCCCCCCCCCCCCCCCCCCCCCCCCCCCCCC	1	-33.63	2
		2
		3
AT	ATATATATATATATATATATATATATATATATATATATATATATATATATATATATATAT	1	-12.7	3
		2
		3
TA	TATATATATATATATATATATATATATATATATATATATATATATATATATATATATATA	1	-12.57	4
		2
		3
GC	GCGCGCGCGCGCGCGCGCGCGCGCGCGCGCGCGCGCGCGCGCGCGCGCGCGCGCGCGCGC	1	-41.61	-
		2
		3
CG	CGCGCGCGCGCGCGCGCGCGCGCGCGCGCGCGCGCGCGCGCGCGCGCGCGCGCGCGCGCG	1	-41.42	-
		2
		3
AC	ACACACACACACACACACACACACACACACACACACACACACACACACACACACACACAC	1	-26.72	5
		2
		3
TG	TGTGTGTGTGTGTGTGTGTGTGTGTGTGTGTGTGTGTGTGTGTGTGTGTGTGTGTGTGTG	1	-26.67	6
		2
		3
AG	AGAGAGAGAGAGAGAGAGAGAGAGAGAGAGAGAGAGAGAGAGAGAGAGAGAGAGAGAGAG	1	-24.74	7
		2
		3
TC	TCTCTCTCTCTCTCTCTCTCTCTCTCTCTCTCTCTCTCTCTCTCTCTCTCTCTCTCTCTC	1	-25.04	8
		2
		3
ATC	ATCATCATCATCATCATCATCATCATCATCATCATCATCATCATCATCATCATCATCATC	1	-22.15	9
		2	-22.8	10
		3	-22.88	11
TGA	TAGTAGTAGTAGTAGTAGTAGTAGTAGTAGTAGTAGTAGTAGTAGTAGTAGTAGTAGTAG	1	-19.74	12
		2	-20.57	13
		3	-20.3	14
AGC	AGCAGCAGCAGCAGCAGCAGCAGCAGCAGCAGCAGCAGCAGCAGCAGCAGCAGCAGCAGC	1	-30.08	15
		2	-30.3	16
		3	-31.2	17
TCG	TCGTCGTCGTCGTCGTCGTCGTCGTCGTCGTCGTCGTCGTCGTCGTCGTCGTCGTCGTCG	1	-31.34	18
		2	-31.31	19
		3	-31.97	20

## Sheet: Experession pattern
expression pattern 1, 87 orfs
At1g02860	-0.0117231	-0.188413	-0.097365	-0.261001	0.15532	-0.0378753	0.0224251	0.268131	0.150503
At1g06060	0.145304	-0.2578	-0.0422143	-0.13313	-0.0431046	-0.0874152	0.0992485	0.179288	0.139823
At1g11360	0.204536	-0.172389	0.0283485	-0.123479	0.136621	0.0124245	-0.0761732	0.0182834	-0.028172
At1g16890	0.0522191	-0.103442	-0.0235132	-0.213715	0.0812794	-0.0586913	0.134931	0.0418097	0.0891215
At1g19120	0.0123807	-0.0467381	-0.0168757	-0.153592	0.0883494	-0.0275554	0.0787926	0.0170074	0.0482307
At1g19870	0.0788989	-0.359222	-0.123594	-0.227725	0.174421	-0.0126849	0.190407	0.122599	0.156901
At1g20260	0.051481	-0.161082	-0.0508892	-0.0964014	0.0149286	-0.0396635	0.100611	0.0871303	0.0938862
At1g22280	-0.00489558	-0.127244	-0.0647735	-0.15318	0.1733	0.0192758	0.0326963	0.0722247	0.0525962
At1g25550	0.0199392	-0.231622	-0.100365	-0.157022	0.15849	0.00934198	0.216598	-0.0189755	0.103615
At1g27540	0.155142	-0.130842	0.0192247	-0.293113	-0.0453429	-0.163916	0.149659	0.156236	0.152951
At1g28210	0.127507	-0.632229	-0.202918	-0.190795	0.0580859	-0.0609942	0.330404	0.270283	0.300656
At1g48630	0.0793576	-0.0798412	0.0019526	-0.0526529	0.038773	-0.00621563	0.0107369	0.00167603	0.00621361
At1g49850	0.0290216	-0.159862	-0.0623308	-0.239296	0.0495919	-0.0876332	0.174039	0.139564	0.156905
At1g50360	0.269517	-0.23872	0.0376647	-0.455375	0.0935176	-0.15498	0.138465	0.160424	0.149486
At1g52980	0.068514	-0.19655	-0.057939	-0.164163	0.0162345	-0.0711459	0.116515	0.153439	0.135095
At1g63780	-0.0248441	-0.194104	-0.106993	-0.281353	0.0200797	-0.122778	0.310257	0.1618	0.237937
At1g71270	0.208017	-0.373704	-0.05372	-0.221701	0.017457	-0.0971718	0.0701889	0.274614	0.176019
At1g72540	-0.082756	-0.667718	-0.34579	-0.667718	0.747319	0.206751	0.332282	0.206751	0.270881
At1g74270	0.0847386	-0.0698081	0.00953378	-0.13035	0.0138072	-0.0564719	0.088045	0.0106429	0.0498628
At1g76030	0.051481	-0.161082	-0.0508892	-0.0964014	0.0149286	-0.0396635	0.100611	0.0871303	0.0938862
At1g78870	0.0522191	-0.103442	-0.0235132	-0.213715	0.0812794	-0.0586913	0.134931	0.0418097	0.0891215
At2g16640	0.0130616	-0.108479	-0.0464296	-0.276976	0.139229	-0.0539164	0.164396	0.057282	0.111833
At2g24790	0.0670451	-0.0884544	-0.00861083	-0.0538674	0.0535125	0.000821008	0.072646	-0.0538674	0.0107755
At2g26990	0.114609	-0.391983	-0.116565	-0.179574	0.08632	-0.0405101	0.217316	0.134086	0.176301
At2g27710	0.0820539	-0.213639	-0.0582297	-0.147454	0.113443	-0.0111162	-0.0369141	0.190556	0.0812996
At2g29590	0.44078	-0.532108	0.034837	-0.0810721	-0.0477774	-0.0643285	0.0882294	0.0782106	0.0832283
At2g37360	0.0841445	-0.12273	-0.0155879	-0.319922	0.0280012	-0.135497	0.289126	0.0280012	0.164464
At2g38000	0.0533706	-0.298767	-0.111981	-1.09264	0.164688	-0.331133	0.386059	0.686385	0.544023
At2g38110	0.233094	-0.391397	-0.0456219	-1.11286	0.615267	-0.00417709	0.224403	0.246033	0.235259
At2g38960	0.443233	-0.797775	-0.0477534	-0.125178	0.148785	0.0182966	0.303508	-0.0713402	0.128224
At2g43640	0.0337305	-0.0935984	-0.0285297	-0.109273	0.0860214	-0.0083242	0.0528173	0.0271272	0.0400295
At3g01270	0.265821	-0.513913	-0.0719969	-1.35681	0.345388	-0.268002	0.693814	0.366348	0.539352
At3g02630	0.246357	-0.225879	0.0294754	-0.216896	-0.0087746	-0.109085	0.187355	0.000498454	0.0969497
At3g03960	0.0233583	-0.0622673	-0.0188198	-0.0181608	-0.00114918	-0.0096302	0.0288897	0.0288897	0.0288897
At3g04920	0.0809755	-0.09268	-0.00324154	-0.162657	0.0390358	-0.0582886	0.0372534	0.0937986	0.0658035
At3g05000	0.18556	-0.187001	0.011273	-0.132887	-0.00985326	-0.0700592	0.094463	0.0406815	0.0678226
At3g07770	-0.0602425	-0.182173	-0.11992	-0.303988	0.165272	-0.0503624	0.130949	0.236024	0.184442
At3g11200	0.099649	-0.11608	-0.00418705	-0.0966944	0.0460964	-0.0235333	0.104811	-0.0429053	0.0328432
At3g11440	-0.00500223	-0.486654	-0.225821	-0.460502	0.0746572	-0.168249	0.355466	0.491184	0.42492
At3g11700	0.0780702	-0.116489	-0.0159325	-0.0404782	0.0780702	0.0200134	0.0321584	-0.0345854	-0.000827259
At3g11830	0.0736096	-0.149071	-0.0334385	-0.152097	-0.0559299	-0.103212	0.141076	0.139015	0.140046
At3g18820	-0.0100473	-0.180444	-0.0927318	-0.100083	0.107946	0.00767771	0.0459229	0.132103	0.0896565
At3g22380	0.0164057	-0.343982	-0.152564	-0.310913	0.160742	-0.0558967	0.179074	0.277834	0.2293
At3g22530	0.0881632	-0.145673	-0.0240227	-0.213865	0.123005	-0.0356199	-0.0402853	0.176255	0.0720437
At3g22845	0.0962095	-0.124203	-0.00979137	-0.133288	0.0119438	-0.0588455	0.128763	0.0158167	0.0733948
At3g23990	0.00600772	-0.0765233	-0.0346674	-0.160985	0.180491	0.0198322	0.0518365	-0.00814766	0.0221563
At3g24320	0.3256	-0.199492	0.0868124	-0.407297	0.217743	-0.0611888	-0.217194	0.230859	0.0241569
At3g24500	0.559406	-0.546246	0.110003	-0.611341	0.103256	-0.210243	-0.028847	0.414324	0.209688
At3g27080	-0.0105539	-0.0217176	-0.0161253	-0.099154	0.0312952	-0.032455	0.0396189	0.0594983	0.0495934
At3g27740	0.0553024	-0.0794985	-0.010524	-0.0886681	0.114764	0.0166309	0.0191229	-0.0245707	-0.00255892
At3g48190	0.194886	-0.219324	0.00259569	-0.544565	0.293263	-0.0656674	-0.180153	0.387532	0.131433
At3g51780	0.101767	-0.590734	-0.203325	-0.170094	0.314534	0.0924747	0.289338	0.00973823	0.156301
At3g52300	0.0818848	-0.0995822	-0.00599723	-0.0661083	0.00557084	-0.0298238	0.000886387	0.0748353	0.0383343
At3g55370	0.509945	-0.478559	0.0987497	-1.45584	0.652685	-0.0464482	-0.152058	0.599443	0.272081
At3g60340	-0.0147122	-0.108218	-0.0607074	-0.237352	0.0842296	-0.0676192	0.0632903	0.205134	0.135955
At4g00660	0.0972967	-0.104782	-0.000207477	-0.0564862	0.0658249	0.00596518	0.0401439	-0.0456429	-0.00211196
At4g00940	-0.0657466	-0.260475	-0.159828	-0.437715	0.241535	-0.0584786	0.199715	0.293582	0.247411
At4g01100	0.0371869	-0.0626246	-0.0118558	-0.0540387	0.0392688	-0.00663058	-0.00172965	0.0407546	0.0196689
At4g10250	-0.0216178	-0.618262	-0.289313	-1.80589	0.594042	-0.155635	0.745285	0.785737	0.765653
At4g13070	0.624636	-1.41976	-0.0622062	-1.8962	0.425732	-0.311234	1.2096	0.522756	0.906671
At4g14080	-0.0502914	-0.412861	-0.220216	-0.412861	0.239215	-0.0502914	0.239215	0.364746	0.303346
At4g28000	0.811913	-1.4138	0.0914352	-1.4138	0.290215	-0.323602	0.562741	0.740528	0.654371
At4g28860	0.261091	-0.337047	-0.00719929	-0.45418	0.147434	-0.122238	0.142696	0.198549	0.170893
At4g37730	0.203403	-0.258939	-0.00932572	-0.808278	0.288126	-0.158336	0.419132	0.0693863	0.254832
At5g03030	0.0684311	-0.187193	-0.053727	-0.15606	0.0588128	-0.044627	0.0418255	0.166847	0.105691
At5g05450	0.229323	-0.175004	0.0412779	-0.305977	0.179004	-0.0432028	-0.130179	0.174544	0.0302134
At5g05670	0.151794	-0.156328	0.00594314	-0.097984	0.0423158	-0.0261294	-0.0188247	0.0719407	0.0272721
At5g06000	0.0467481	-0.171157	-0.0580941	-0.363802	0.0601686	-0.136298	0.261415	0.152861	0.208159
At5g08210	0.260988	-0.41855	-0.039136	-0.0756617	-0.0301471	-0.0527251	0.154636	0.0818796	0.118716
At5g13790	0.937517	-1.21681	0.229872	-2.47057	0.443702	-0.376591	0.168843	1.38358	0.900455
At5g16470	0.0440503	-0.157357	-0.0531415	-0.238594	-0.0402783	-0.136031	0.146402	0.240653	0.194297
At5g19200	0.153191	-1.88243	-0.531936	-0.583775	0.319201	-0.0627646	1.26813	0.416225	0.904163
At5g22760	0.0585611	-0.144027	-0.0391796	-0.0456889	0.0270064	-0.00888326	0.0516088	0.049865	0.0507371
At5g23050	0.229495	-0.14074	0.0562215	-0.319338	0.0105567	-0.144981	0.150946	0.0543728	0.103467
At5g25220	0.170357	-0.639312	-0.178407	-0.4008	0.285834	-0.0170132	0.229251	0.290096	0.259994
At5g42000	0.124952	-0.135634	0.000534323	-0.202558	0.0090101	-0.0928991	0.130511	0.0669859	0.099098
At5g42390	0.190391	-0.217244	0.000923634	-0.107194	0.116	0.00871468	0.0583582	-0.0534744	0.00352526
At5g51120	0.0715323	-0.125403	-0.0235777	-0.112422	0.060111	-0.0235777	0.103241	-0.00165176	0.0517478
At5g55630	0.204067	-0.158264	0.0342466	-0.227845	0.123872	-0.0412939	0.11587	-0.0744842	0.0238301
At5g56030	0.106202	-0.0396529	0.035117	-0.140713	0.0683402	-0.0324031	-0.0257503	0.0276584	0.00120152
At5g59150	0.0952191	-0.214916	-0.0515309	-0.419171	0.128124	-0.119725	0.26983	0.116818	0.195352
At5g59220	0.227488	-0.562295	-0.114021	-2.19701	0.323246	-0.444938	0.98969	0.85427	0.923569
At5g62190	0.0370989	-0.164754	-0.0602998	-0.334741	0.0514498	-0.128762	0.0384093	0.355789	0.20581
At5g63830	0.135764	-0.123258	0.0120585	-0.386292	0.0825517	-0.132908	0.0950067	0.179305	0.137772
At5g65760	0.0504228	-0.215123	-0.076249	-0.304996	0.105128	-0.085409	0.384842	-0.0446394	0.186024
At5g66680	0.0343696	-0.0209407	0.00698005	-0.0652503	0.0272742	-0.0182465	-0.0177573	0.0414306	0.0121404
AtMg00090	0.688665	-0.537753	0.202032	-0.984892	-0.0588921	-0.448839	0.757833	-0.0338009	0.415646
Expression pattren 2, 112 orfs
At1g02450	-0.449106	1.01746	0.463021	-2.42311	0.0363209	-0.722671	0.308693	1.04566	0.723731
At1g03330	0.00563865	0.00390583	0.00477224	-0.273068	0.11082	-0.0683922	0.00852209	0.134773	0.0730281
At1g07000	-0.101661	0.179642	0.0458357	-0.297212	0.103628	-0.0829152	0.0233862	0.0782281	0.0510675
At1g11190	0.0553601	0.405303	0.240916	-0.862178	0.0171407	-0.356538	-0.224748	0.525893	0.198852
At1g17530	-0.0782593	0.143794	0.0370352	-0.487761	0.10873	-0.158905	-0.0877979	0.366186	0.156978
At1g19880	-0.00802554	0.260463	0.132456	-0.35198	-0.0272802	-0.180514	-0.0808762	0.193133	0.0626241
At1g20050	-0.111155	0.122048	0.010153	-0.168849	-0.0543487	-0.110463	0.0420391	0.165491	0.105085
At1g25220	-0.0916803	0.0224321	-0.0334961	-0.309325	0.221741	-0.0194928	-0.00199625	0.140702	0.0711162
At1g26820	-0.215181	0.0278123	-0.0885746	-0.393603	0.214308	-0.057862	0.0305369	0.307118	0.175445
At1g32210	-0.0480954	0.0195459	-0.0138785	-0.335028	0.139652	-0.0782534	-0.111475	0.311865	0.115668
At1g35460	-0.0531686	0.101987	0.0264942	-0.354579	0.0511681	-0.137488	-0.100524	0.333413	0.132698
At1g41830	-0.0375281	0.151748	0.0602111	-0.184173	0.0361442	-0.0698129	-0.119544	0.144464	0.0184907
At1g45145	-0.375611	0.39213	0.0587375	-0.873271	0.386368	-0.110132	-0.237762	0.550188	0.209351
At1g47128	-0.0272028	0.160902	0.0699127	-0.181795	-0.0388901	-0.108574	-0.101275	0.180463	0.0464599
At1g48550	-0.123963	0.140047	0.0140731	-0.242858	-0.0470383	-0.141629	0.108013	0.159412	0.133942
At1g49050	0.0431481	0.144235	0.0945765	-0.449569	0.0431481	-0.182277	-0.198521	0.383573	0.121687
At1g49410	-0.0283219	-0.0211283	-0.0247208	-0.319546	0.065882	-0.113999	0.0242742	0.266886	0.150674
At1g51830	-0.215426	0.182693	-0.00267744	-0.819199	0.241965	-0.193174	0.0542369	0.472887	0.278695
At1g53920	-0.186745	0.391991	0.131451	-0.583262	0.236657	-0.115823	-0.0448419	0.126959	0.0436143
At1g57620	-0.102229	0.22516	0.0707325	-0.320069	-0.150605	-0.23285	0.0733675	0.264432	0.17206
At1g62710	-0.287808	0.305686	0.0392449	-0.287808	0.0248487	-0.123026	0.0289767	0.188791	0.111095
At1g64850	-0.0248117	0.0313292	0.00353146	-0.11022	0.0636416	-0.0206718	-0.00356865	0.041585	0.0191851
At1g65980	-0.137838	0.106975	-0.0102452	-0.203067	-0.0614156	-0.130504	0.012108	0.274646	0.149341
At1g68850	0.162488	0.165062	0.163775	-0.583091	-0.0213518	-0.275052	-0.283801	0.50691	0.165062
At1g72890	-0.375821	0.181469	-0.0704323	-0.71089	0.211632	-0.177115	-0.0979129	0.689934	0.349135
At1g74310	0.179926	-0.102218	0.0457402	-1.82007	0.271848	-0.424146	-0.353756	1.41581	0.786867
At1g75540	-0.17977	0.23951	0.0450487	-0.430159	0.141264	-0.116339	-0.0159193	0.213187	0.103177
At1g79340	-0.157838	0.294539	0.08601	-0.282729	0.019886	-0.123502	-0.0637665	0.16971	0.0576897
At2g03890	-0.218298	0.227502	0.0217535	-0.350835	0.131401	-0.0896609	0.0826752	0.102726	0.0927355
At2g04350	-0.113275	0.294332	0.104877	-0.566134	0.121767	-0.181565	-0.153352	0.364604	0.128746
At2g04780	-0.0422712	0.217289	0.0933384	-0.326101	0.0532269	-0.124006	-0.136112	0.214703	0.049932
At2g18040	-0.0479353	0.102961	0.029485	-0.186858	0.0854122	-0.0443094	-0.0345114	0.0746529	0.0211031
At2g19830	-0.16203	0.120103	-0.0140778	-0.221673	0.0259255	-0.0925686	0.0481113	0.180425	0.115784
At2g21270	-0.185312	0.113297	-0.028296	-0.387555	0.158365	-0.0889254	-0.00125313	0.275778	0.143902
At2g21600	-0.119208	0.092782	-0.00932312	-0.131351	-0.00523472	-0.0669155	0.00290775	0.155253	0.08109
At2g23460	-0.139108	0.15388	0.0148109	-0.184196	0.0381965	-0.0687185	-0.0539023	0.174321	0.0647172
At2g24570	-0.0272669	0.105842	0.0408221	-0.513767	0.110724	-0.167992	-0.124315	0.409066	0.166886
At2g32520	-0.0658142	0.172401	0.0582054	-0.377687	0.142645	-0.0941889	-0.059188	0.165891	0.0577362
At2g34470	-0.0379554	0.07209	0.0181164	-0.150858	-0.0144149	-0.0810238	0.0485767	0.080727	0.0647415
At2g35000	-0.188705	0.184646	0.0100141	-0.390948	0.0153084	-0.173567	-0.158586	0.496198	0.205639
At2g36790	-0.124544	0.912451	0.485187	-2.0694	-0.0162907	-0.704829	0.376854	0.631038	0.509537
At2g39780	-0.11815	0.0639877	-0.024209	-0.20084	0.0584297	-0.0653887	-0.045227	0.231587	0.0998096
At2g41410	-0.232837	0.244328	0.0253841	-0.332633	-0.0312718	-0.174098	-0.0986318	0.417416	0.182344
At2g43670	0.166757	0.0517919	0.11042	-0.743975	0.284594	-0.139904	-0.162865	0.329159	0.104022
At2g47710	0.0487511	-0.0185759	0.0154803	-0.262202	0.0803349	-0.0807912	-0.0367572	0.178746	0.0750144
At2g48130	-0.0928975	0.0165256	-0.0371486	-0.348921	0.12979	-0.0898005	-0.0371486	0.311768	0.147832
At3g04060	-0.501032	0.421149	0.0325201	-0.918267	0.27877	-0.199003	0.00958331	0.563385	0.312896
At3g04080	0.0156647	0.0381142	0.0269334	-0.306596	0.0883338	-0.0956596	0.00899474	0.145404	0.0788109
At3g05630	-0.197021	0.284106	0.0635067	-1.0271	0.0202098	-0.410424	-0.227395	0.988846	0.505267
At3g07160	-0.00524998	0.161115	0.0803294	-0.251094	-0.016871	-0.129234	-0.034132	0.139724	0.0554128
At3g09440	-0.121183	0.203053	0.0500239	-0.605106	0.0731057	-0.226508	-0.136039	0.528497	0.234157
At3g17240	-0.0582587	0.0811704	0.0131391	-0.190653	0.0430797	-0.0690581	0.0108102	0.10902	0.0607503
At3g20800	-0.041549	0.170391	0.0683095	-0.154231	-0.0215442	-0.0863626	-0.0018132	0.0450108	0.0217888
At3g21090	0.0178022	-0.0146193	0.00168252	-0.504425	-0.0703287	-0.271111	0.0284495	0.518415	0.294134
At3g21510	-0.0685729	0.0979277	0.017078	-0.427922	-0.00435342	-0.200648	-0.129349	0.4978	0.218039
At3g22370	-0.0979275	0.0236536	-0.0358561	-0.452406	0.0149261	-0.1999	-0.16378	0.626488	0.284802
At3g22620	-0.40313	0.0820205	-0.140257	-0.477843	0.127335	-0.143751	-0.0651829	0.671273	0.349536
At3g22850	-0.106505	0.189281	0.0489554	-0.342695	0.010899	-0.155092	-0.07583	0.30428	0.126707
At3g27150	-0.179216	0.807022	0.396587	-1.78256	0.0483848	-0.594254	-0.303088	1.06775	0.539371
At3g29270	-0.0289166	0.301908	0.145958	-0.774406	0.222028	-0.19182	-0.012018	0.225594	0.111674
At3g45190	-0.0145541	-0.084602	-0.049153	-0.239799	0.0908951	-0.0649973	0.00243892	0.23589	0.123881
At3g48570	-0.204672	0.0250697	-0.0852332	-0.324454	0.175312	-0.0530376	0.0769086	0.233028	0.157079
At3g54040	-0.146749	0.270193	0.0767329	-0.628723	0.221796	-0.141674	-0.2983	0.494706	0.152017
At3g58750	0.00375493	-0.00504605	-0.000638644	-0.102871	0.0396541	-0.0298492	0.022435	0.0408762	0.0316847
At3g59850	-1.5755	1.51196	0.672426	-1.35311	-0.253573	-0.701032	-0.073001	1.12494	0.646891
At3g60190	-0.0495495	0.0494777	0.00081359	-0.237482	0.0565787	-0.0829729	0.0807735	0.0946384	0.0877229
At3g61740	-0.579332	0.434882	0.0151217	-1.23754	0.309351	-0.266	0.180309	0.687269	0.455944
At4g01480	-0.295644	0.2886	0.0258534	-0.714281	0.264801	-0.14323	-0.354213	0.676689	0.251424
At4g02620	-0.0150518	0.0802879	0.0334053	-0.191196	0.0415411	-0.0701399	-0.0412121	0.120472	0.041894
At4g04460	-0.421792	0.413821	0.0556861	-1.68927	0.363195	-0.325219	-0.177373	1.1483	0.632656
At4g07410	0.00793107	-0.00693528	0.000517209	-0.125813	-0.00286547	-0.0630299	0.0132993	0.112924	0.0639714
At4g15210	-0.624181	0.458185	0.0162109	-0.840245	-0.0825326	-0.412206	-0.198802	1.09503	0.588541
At4g16280	-0.109226	-0.00412862	-0.0557205	-0.299277	0.125058	-0.0715648	-0.0143005	0.285685	0.143475
At4g23220	-0.410918	0.725218	0.266214	-2.47232	-0.30938	-1.0186	0.12306	1.85899	1.23774
At4g24920	-0.108638	0.00746621	-0.0494176	-0.194325	0.0948161	-0.0425225	0.0379161	0.156354	0.0983504
At4g25640	-0.0855165	0.206614	0.0679306	-0.264663	-0.059856	-0.158629	-0.0904022	0.278637	0.105885
At4g31580	-0.168719	0.0976396	-0.0294013	-0.213462	0.0464377	-0.0776677	0.0565228	0.172812	0.115839
At4g33360	-0.0623985	0.060451	0.000333256	-0.178553	0.102591	-0.0311437	-0.0761371	0.145775	0.039082
At4g35490	-0.000464227	0.115689	0.0587818	-0.254204	0.074526	-0.0804956	-0.0239656	0.0807764	0.0293553
At4g39800	-0.141731	0.128495	-0.000300195	-0.402797	0.134317	-0.109387	0.0713875	0.188753	0.131263
At5g01540	-0.543084	0.146089	-0.157731	-0.884392	0.26427	-0.198639	-0.0559219	0.91782	0.511588
At5g01820	0.0216415	0.435727	0.24349	-0.674048	0.084944	-0.245204	-0.364503	0.418483	0.0794689
At5g02260	-0.214825	0.0737673	-0.0633248	-0.552919	-0.0109223	-0.256616	-0.0302404	0.684274	0.370806
At5g06120	-0.0168996	-0.0850477	-0.0505714	-0.238569	0.0755768	-0.0729623	-0.0140085	0.268391	0.13409
At5g06600	-0.0290798	0.0537463	0.0129276	-0.309598	0.0714394	-0.106536	-0.0406016	0.240769	0.106932
At5g07220	-0.021255	0.105213	0.0433645	-0.32363	-0.135326	-0.226408	-0.066968	0.425079	0.199932
At5g08170	0.00406101	-0.0579393	-0.0266058	-0.275062	0.0714262	-0.0914409	-0.107743	0.346259	0.137044
At5g09850	-0.0378883	0.0495746	0.0065057	-0.0969241	-0.0344899	-0.0653694	-0.0134285	0.13128	0.0607397
At5g18900	-0.119992	0.0395622	-0.0380102	-0.241791	0.0121931	-0.109217	0.00725073	0.292881	0.157123
At5g20650	-0.0310853	0.0360467	0.0028712	-0.230944	0.114382	-0.047973	-0.0811399	0.181625	0.0562169
At5g23880	0.0324193	-0.0127229	0.0100247	-0.182869	-0.00393142	-0.0906276	-0.0430216	0.204621	0.0861069
At5g32440	-0.0212544	-0.0230635	-0.0221585	-0.183741	0.00915686	-0.0840705	-0.00418075	0.218084	0.111228
At5g34930	-0.0251177	0.202688	0.0932767	-0.440155	-0.0519417	-0.23303	0.0270784	0.272305	0.154896
At5g35980	0.0372521	0.0412909	0.0392729	-0.275354	0.131183	-0.0578131	-0.0795735	0.133076	0.030666
At5g37600	-0.406774	0.254851	-0.0383621	-0.482923	0.130986	-0.143557	-0.110862	0.543523	0.253119
At5g37780	0.00384977	0.132543	0.0696314	-0.354126	0.04893	-0.138568	-0.111879	0.262307	0.0873115
At5g38160	0.0852177	-0.0562552	0.0162146	-0.750152	0.384778	-0.073849	-0.252652	0.484313	0.162385
At5g40390	-0.0995732	0.00521035	-0.0462304	-0.394095	0.0266203	-0.168456	0.0045938	0.435726	0.236205
At5g41010	-0.0844625	0.0245701	-0.0289162	-0.207299	0.0873591	-0.0524605	0.00611655	0.166537	0.0885555
At5g41680	-0.406678	0.0787493	-0.143643	-1.08224	0.317688	-0.218745	0.122872	0.819295	0.512704
At5g46700	0.020639	0.0947066	0.058148	-0.32583	0.0516378	-0.124786	-0.100293	0.243794	0.0819842
At5g47120	-0.229398	0.22976	0.0183709	-0.395708	0.144631	-0.100388	-0.0919196	0.304684	0.119968
At5g48560	-0.0191941	0.270682	0.133012	-0.709509	-0.035542	-0.333522	0.0713735	0.385648	0.237052
At5g49770	0.0604817	0.618171	0.366108	-2.32779	0.661564	-0.167324	-1.50836	1.56774	0.729407
At5g50460	0.0198666	0.0217501	0.0208089	-0.168074	0.0809371	-0.0382026	-0.040952	0.0820214	0.0218445
At5g51290	-0.131943	0.156138	0.0192762	-0.603843	0.370558	-0.0358957	-0.0116485	0.160412	0.0769454
At5g52810	-0.583306	0.268357	-0.0955209	-0.756263	0.139494	-0.239952	-0.124875	0.909184	0.482882
At5g60800	-0.116519	0.537091	0.246988	-0.956943	0.288996	-0.203455	-0.235163	0.351325	0.0876802
At5g61030	0.228956	0.106582	0.169067	-0.622521	-0.0782006	-0.324841	-0.074621	0.408506	0.187072
At5g61210	0.0527362	0.149004	0.101673	-0.4463	0.100884	-0.14692	-0.0556861	0.178471	0.0661377
At5g62610	-0.100678	0.0341466	-0.0316912	-0.338611	0.113701	-0.0948011	0.0803274	0.197502	0.140104
At5g66850	0.161572	0.399541	0.285458	-1.09185	0.0988369	-0.377004	-0.269634	0.577706	0.215371
Expression Pattern 3, 94 orfs
At1g05000	-0.0465409	0.0527247	0.00394519	0.131325	-0.263535	-0.0526382	0.0323866	0.0839394	0.0583933
At1g05680	-0.127146	0.317639	0.11232	-0.515711	-2.59663	-1.20961	1.8878	0.714156	1.41717
At1g08570	0.122939	0.030231	0.0773296	0.0173116	-0.290982	-0.128616	-0.0273533	0.140256	0.0588841
At1g11410	0.247457	-0.108259	0.0805349	-0.0611739	-0.590953	-0.301881	0.394643	0.0895052	0.250126
At1g12200	-0.112673	-0.0313724	-0.0714501	0.0780111	-0.311304	-0.103554	0.31505	0.0490981	0.188194
At1g12830	-0.0308968	-0.125534	-0.0774395	0.00677331	-0.443392	-0.200822	0.437528	0.13818	0.295604
At1g14240	0.0901078	-0.208416	-0.0514466	0.146302	-0.606965	-0.181718	0.133275	0.403923	0.274937
At1g18450	0.0929325	-0.061639	0.0177158	0.118468	-0.235897	-0.0478613	0.00124391	0.0759543	0.0390828
At1g18870	-0.121157	-0.0616567	-0.0911005	0.154477	-0.414889	-0.102299	0.412275	0.00247407	0.221876
At1g20670	0.0360892	-0.17433	-0.0652878	0.0590909	-0.358484	-0.134641	0.251102	0.173593	0.212868
At1g21160	0.137139	-0.110172	0.0187764	0.176133	-0.560833	-0.145795	0.176133	0.146986	0.161633
At1g21400	-0.00844036	-0.0905117	-0.0488924	0.0113679	-0.792712	-0.335364	0.769167	0.0437895	0.451595
At1g22710	0.135257	-0.0296503	0.055158	0.114158	-0.481471	-0.153134	0.149429	0.0901555	0.120097
At1g28130	-0.0965508	0.00742732	-0.0436252	0.0743242	-0.318088	-0.108581	0.200868	0.12217	0.162056
At1g29150	-0.00451745	-0.0329274	-0.0186528	-0.0444507	-0.109526	-0.0766209	0.1318	0.059024	0.0958711
At1g34270	0.0656838	-0.126447	-0.0271854	-0.134691	-0.442223	-0.280278	0.381122	0.247949	0.316071
At1g44970	0.0556254	0.180787	0.119563	-0.108494	-0.393043	-0.243764	0.0511866	0.206964	0.131176
At1g48380	0.0477748	0.112665	0.0805846	0.00523525	-0.315793	-0.146368	-0.0165143	0.158677	0.0737391
At1g50060	-0.162552	0.00608979	-0.0757684	-0.0622472	-0.366785	-0.206496	0.322875	0.255368	0.289516
At1g51640	-0.0508498	0.188726	0.0739053	-0.0140912	-0.835121	-0.366972	0.331238	0.338362	0.334804
At1g54390	0.0957452	-0.100042	0.00117032	0.0236708	-0.401151	-0.173159	0.235245	0.133333	0.185188
At1g55310	0.0914526	0.0105672	0.0515771	0.0552478	-0.440851	-0.171582	0.0256152	0.240772	0.137201
At1g56200	-0.0143709	0.0342836	0.0101614	0.0604324	-0.158855	-0.0450487	0.100321	-0.0256386	0.0387154
At1g61040	-0.0448477	-0.0415651	-0.0432054	-0.208215	-0.371714	-0.287649	0.425003	0.237771	0.334422
At1g69080	0.00416381	0.132488	0.069752	-0.51521	-1.17417	-0.807391	0.508636	1.00416	0.777571
At1g69700	0.0696463	-0.0809756	-0.00369989	0.131522	-0.267389	-0.0541898	0.125552	0.0104069	0.0691279
At1g78600	0.150771	-0.305111	-0.0592379	0.0400239	-0.691835	-0.279987	0.58452	0.169131	0.391724
At1g78830	0.0218285	-0.104251	-0.0398341	-0.0190669	-0.307777	-0.156212	0.152857	0.250138	0.202317
At2g01060	-0.0390708	0.0165026	-0.0110166	-0.0390708	-0.193533	-0.114236	0.24704	0.00314405	0.13024
At2g01630	-0.0127659	-0.0470362	-0.0297995	-0.114481	-0.416559	-0.257628	0.444817	0.135168	0.298284
At2g17410	0.0568087	0.0172803	0.0371797	0.132757	-0.430179	-0.121426	0.140137	0.0645859	0.102856
At2g22680	0.0386393	0.0173443	0.0280311	0.0280311	-0.586512	-0.246763	0.38051	0.095629	0.24509
At2g24430	0.229463	0.010061	0.123929	0.117474	-1.27404	-0.41664	0.461232	0.34448	0.404037
At2g28200	0.119467	-0.132195	-0.000883102	0.106435	-0.261381	-0.065783	0.0284324	0.127231	0.0786772
At2g32990	0.182731	-0.355962	-0.0616173	0.065724	-0.488477	-0.184927	0.0781074	0.474529	0.289892
At2g37080	-0.176878	-0.0244155	-0.0986333	-0.028555	-0.306592	-0.160886	0.377124	0.150553	0.268282
At2g38840	-0.0927127	0.0679509	-0.0101455	0.14364	-0.375521	-0.0927127	0.190945	0.0475346	0.121021
At2g39630	0.0962619	-0.0507579	0.0246238	-0.202147	-0.334951	-0.267022	0.265632	0.223594	0.244766
At2g41190	0.00260189	-0.0638101	-0.0302222	0.140374	-0.500636	-0.144819	0.354314	0.0375779	0.204621
At2g41620	-0.0186662	-0.00051917	-0.00956429	0.108006	-0.217412	-0.0455474	0.157333	-0.0370449	0.0634152
At2g43880	-0.062799	-0.17697	-0.118755	-0.276505	-0.932919	-0.567697	0.606754	0.814518	0.714373
At2g47270	-0.307049	0.523026	0.166882	0.223465	-3.39451	-0.66357	1.47722	0.797507	1.17703
At3g03330	-0.0418479	-0.040683	-0.0412652	-0.00503084	-0.203204	-0.100717	0.159076	0.129371	0.1443
At3g07420	-0.461842	0.269069	-0.0505858	0.357334	-1.07349	-0.187521	0.64723	0.100281	0.399521
At3g12710	-0.109697	0.030582	-0.0378532	0.150592	-0.407149	-0.101492	0.177171	0.139426	0.158422
At3g15070	0.0860958	-0.0596853	0.0150456	-0.0487695	-0.238311	-0.14043	0.239418	0.0150456	0.13159
At3g17770	0.0116987	-0.112249	-0.0489445	0.0461249	-0.290178	-0.112249	0.122906	0.213815	0.169076
At3g18930	-0.0167432	-0.221725	-0.115597	0.119892	-0.897596	-0.300952	0.627495	0.322281	0.482945
At3g23890	-0.090171	0.00749238	-0.0405127	0.0101131	-0.225431	-0.102857	0.180329	0.113658	0.147379
At3g45710	0.0893213	0.053321	0.0714332	0.166532	-0.677582	-0.19465	-0.080262	0.395022	0.176864
At3g51310	-0.0173681	0.00238922	-0.00745556	0.146007	-0.254686	-0.0404727	0.0666306	0.0477393	0.057216
At3g51895	-0.134622	-0.214349	-0.173935	-0.160711	-0.807532	-0.448171	1.01738	0.241103	0.680836
At3g55130	0.0480449	0.0561845	0.0521204	-0.0643742	-0.417521	-0.230169	0.272476	0.0962064	0.187032
At3g61710	0.0778767	0.0597292	0.0688316	-0.0498418	-0.355985	-0.194808	0.211732	0.0495478	0.132918
At3g62790	0.0060873	0.00955915	0.00782442	-0.00964212	-0.0965557	-0.0524445	0.0896592	-9.53674e-06	0.0455217
At4g02195	-0.110252	-0.0804171	-0.0952577	0.11644	-0.532485	-0.17184	0.455926	0.120116	0.29777
At4g04470	-0.0350553	0.0194715	-0.00753413	0.0287036	-0.236582	-0.0978504	0.159592	0.0590557	0.110199
At4g04720	0.0810585	-0.0883589	-0.00116497	0.04956	-0.200792	-0.0701924	0.0370454	0.115856	0.0769886
At4g08790	0.181076	-0.0659182	0.0628584	-0.0413158	-0.510802	-0.257045	0.123178	0.295864	0.212103
At4g10760	-0.0327171	0.0157234	-0.00829347	-0.0635398	-0.241877	-0.149955	0.226402	0.0930091	0.161247
At4g14710	0.0419544	-0.0182769	0.012153	-0.044768	-0.124519	-0.0840928	0.102377	0.0424484	0.0727237
At4g14716	0.0419544	-0.0182769	0.012153	-0.044768	-0.124519	-0.0840928	0.102377	0.0424484	0.0727237
At4g34160	0.0133895	-0.0355201	-0.0108581	0.180733	-0.279807	-0.0312381	0.00173468	0.106499	0.0550675
At4g37560	-0.0463414	-0.138264	-0.0915708	0.089542	-0.304042	-0.0938696	0.221139	0.168397	0.195009
At5g01270	0.184263	0.0613485	0.124115	-0.107864	-0.516504	-0.297764	0.160504	0.207638	0.184263
At5g04040	0.126415	-0.149003	-0.00473176	-0.0160295	-0.337391	-0.16778	0.18284	0.18284	0.18284
At5g05540	0.108082	-0.0516981	0.0304028	0.217281	-0.598186	-0.133587	0.145408	0.139728	0.142571
At5g06360	0.0555333	-0.02942	0.0136823	0.000442399	-0.168283	-0.0814544	0.143143	-0.00473891	0.0710954
At5g11530	-0.0987425	0.0412335	-0.0270577	-0.0717755	-0.259848	-0.162749	0.239426	0.146029	0.193484
At5g13780	0.0971559	-0.108176	-0.00185977	0.111105	-0.381065	-0.114093	0.199133	0.0644401	0.133358
At5g16440	0.0892303	-0.0108978	0.040035	0.044318	-0.180453	-0.0636942	-0.0272839	0.0809152	0.0278299
At5g16840	-0.0692487	-0.00282574	-0.0356545	0.0376029	-0.159677	-0.0576677	0.153272	0.0376029	0.0965962
At5g17400	-0.0466295	0.0690407	0.0123648	-0.0366278	-0.268604	-0.147958	0.195343	0.0828685	0.140202
At5g18430	0.815823	0.0970053	0.500727	0.319398	-3.90299	-0.605314	0.778829	1.06663	0.929895
At5g18970	-0.0542756	0.0466532	-0.00292884	0.0220755	-0.518944	-0.223221	0.0368723	0.440826	0.252942
At5g20830	-0.0697938	0.074757	0.00429095	-0.0833727	-0.276505	-0.176709	0.162219	0.189293	0.17582
At5g21170	0.0207384	-0.233174	-0.100639	0.100581	-0.415994	-0.134708	0.340512	0.166538	0.256145
At5g22780	-0.0672842	0.00589508	-0.0302306	-0.0199786	-0.202444	-0.108328	0.0861258	0.194773	0.141472
At5g23080	0.390714	-0.240723	0.109269	0.0604464	-0.708228	-0.273291	0.443775	-0.014655	0.232693
At5g23405	0.298584	-0.154928	0.089575	-0.0545262	-0.627416	-0.31272	0.331427	0.174777	0.255227
At5g26240	0.227487	0.132595	0.180821	-0.0136732	-0.50781	-0.239689	0.162597	-0.0176257	0.0752979
At5g49660	0.185857	0.0427943	0.116098	-0.0974969	-0.568872	-0.314018	0.180804	0.242732	0.212101
At5g51210	0.220222	-0.00758425	0.110811	-0.153974	-0.807051	-0.44387	0.430989	0.288809	0.361649
At5g51710	-0.0697857	-0.0238849	-0.0466529	-0.0299216	-0.269555	-0.144769	0.224518	0.16499	0.195061
At5g53130	-0.00971026	0.035882	0.0132661	0.0446125	-0.186146	-0.0661578	0.180533	-0.0720438	0.0597644
At5g53430	0.335034	-0.029864	0.164091	0.117518	-0.655229	-0.217724	-0.0810892	0.264971	0.102292
At5g53980	0.475849	-1.47554	-0.192369	-0.51073	-3.76312	-1.36676	2.1007	2.44748	2.28449
At5g54590	0.0898701	0.0197092	0.0552159	0.186969	-0.659322	-0.174991	0.125939	0.19548	0.161129
At5g56760	0.00184684	-0.00791306	-0.00302453	-0.0370707	-0.0759854	-0.0563969	0.0722852	0.0467067	0.0595518
At5g57840	0.511189	0.432477	0.472369	0.0833271	-1.98706	-0.60855	0.511189	0.214572	0.37049
At5g59440	-0.0125714	-0.062111	-0.037129	0.0455912	-0.399478	-0.159848	0.209821	0.207209	0.208516
At5g59980	0.335258	-0.530031	-0.0334635	0.102598	-0.956296	-0.331805	0.551499	0.389479	0.472762
At5g60910	0.0159275	-0.0836082	-0.0329821	0.1965	-0.643036	-0.163043	0.153431	0.31849	0.23832
At5g63190	-0.0174356	-0.157489	-0.0857635	0.187518	-0.490659	-0.112083	0.201138	0.249335	0.225438
Expression Pattern 4, 76 orfs
At1g01100	0.00820255	0.0490894	0.0287914	-0.0579205	-0.0283413	-0.0430546	0.0230274	0.00577736	0.0144281
At1g07360	-0.039309	0.0412994	0.00155788	-0.440893	-0.0213985	-0.215952	0.390075	0.0531807	0.231439
At1g08410	-0.0515425	0.124691	0.0392639	-0.689344	-0.0991829	-0.364295	0.416082	0.276398	0.34793
At1g10060	0.174651	0.269147	0.222672	-0.777328	-0.381743	-0.566019	0.5446	0.152283	0.361737
At1g13020	0.198464	0.129579	0.164432	-0.51509	-0.132342	-0.31106	0.0919574	0.217806	0.156254
At1g16190	0.135912	-0.0811863	0.0314426	-0.781626	0.0680399	-0.295126	0.25302	0.361332	0.308192
At1g18800	0.26863	-0.0927691	0.0992174	-0.46118	-0.156002	-0.300537	0.237559	0.190742	0.21434
At1g20200	-0.0163662	0.00799539	-0.00413439	-0.096698	-0.0667774	-0.0816595	0.141425	0.0296133	0.086602
At1g23440	-0.0587371	0.0906932	0.0179116	-0.436767	-0.371457	-0.403743	0.537959	0.231353	0.392786
At1g25260	0.0471688	-0.0555285	-0.00326623	-0.131761	-0.0286912	-0.0793065	0.088133	0.0794526	0.0837995
At1g26310	0.550276	0.441752	0.497034	-0.943538	-0.700267	-0.816781	0.372489	0.274641	0.324395
At1g36060	1.44109	0.993634	1.23464	-4.12876	-1.58444	-2.35617	0.908327	1.96223	1.52945
At1g44820	0.414713	-0.0338907	0.207778	-0.36994	-0.358163	-0.364039	0.418141	-0.0977373	0.183138
At1g47200	0.0875706	-0.00148063	0.0437321	-0.231095	-0.0767408	-0.151855	0.0433583	0.175546	0.110965
At1g47960	-0.011858	0.0898132	0.0398731	-0.440701	-0.322381	-0.380329	0.427026	0.254988	0.34357
At1g54870	0.963693	1.19718	1.08516	-1.33887	-1.78633	-1.54532	1.42666	-0.722199	0.720024
At1g63690	0.0926471	0.0573931	0.0751277	-0.347863	-0.0654635	-0.199765	0.253936	0.00098806	0.132999
At1g64390	0.0376718	0.00357225	0.0207231	-0.297316	-0.0705845	-0.179501	0.0831402	0.239078	0.163215
At1g70620	-0.0172422	0.0164888	-0.000278208	-0.164084	-0.15894	-0.16151	0.271418	0.0494488	0.164698
At1g73660	0.0634414	-0.0173315	0.0236202	-0.155443	-0.111522	-0.133315	0.207375	0.0107609	0.112415
At1g77330	0.103966	0.191203	0.148244	-0.590384	-0.19076	-0.376779	0.00699753	0.457659	0.249854
At1g79030	0.333391	0.101693	0.222188	-0.342114	-0.463301	-0.401436	0.436632	-0.0859342	0.198881
At1g79430	0.369762	-0.000880745	0.196311	-0.939076	-0.0553289	-0.430565	0.27264	0.3005	0.286637
At2g02560	0.000985252	0.0533391	0.0273996	-0.183837	-0.0271381	-0.103361	0.139718	0.0144502	0.0784436
At2g06990	-0.00131586	0.0670478	0.0332706	-0.405559	-0.113047	-0.251903	0.203467	0.244109	0.223931
At2g21970	0.266485	0.0451501	0.160057	-0.232459	-0.139275	-0.185115	0.152065	-0.0989281	0.0320199
At2g29350	-0.218136	0.3839	0.114061	-2.02549	-0.244131	-0.875744	1.47436	0.366827	1.02436
At2g31900	0.470477	0.563586	0.517782	-1.50568	-0.944561	-1.19801	0.291507	1.07138	0.733511
At2g33700	0.0238745	0.12341	0.0745008	-0.273286	-0.187629	-0.229822	0.270158	0.0394041	0.15939
At2g38280	0.0823272	0.0518363	0.0671619	-0.181146	-0.0329677	-0.105156	0.0641101	0.0143765	0.0394576
At2g41900	0.111464	-0.179405	-0.0266526	-0.282961	-0.196999	-0.23934	0.346491	0.194776	0.272627
At2g45210	-0.0610731	-7.22673e-05	-0.0302503	-0.87684	0.0803468	-0.320278	0.476797	0.327359	0.404012
At3g03920	0.0254807	-0.0672451	-0.0201374	-0.259382	-0.0444541	-0.147919	0.248002	0.0930495	0.172605
At3g05160	0.0726093	-0.0896889	-0.00625865	-0.198233	-0.167691	-0.182881	0.280468	0.0990613	0.192614
At3g06180	-0.0510173	0.21059	0.0857076	-0.476079	-0.308071	-0.38963	0.489016	0.122234	0.31725
At3g06330	0.0237676	-0.0475263	-0.0114387	-0.227904	-7.9049e-05	-0.109499	0.234386	0.011192	0.127101
At3g09735	-0.0247371	0.071008	0.0239294	-0.159787	-0.093899	-0.126467	0.103668	0.102967	0.103318
At3g16320	0.847717	0.890786	0.869412	-1.81817	-1.43114	-1.61171	0.661304	0.838947	0.752858
At3g17450	-0.0197367	0.0584422	0.0198823	-0.513893	-0.0230879	-0.247719	0.435733	0.039291	0.251087
At3g21540	-0.0736613	0.0805474	0.00550228	-0.435443	-0.200446	-0.313165	0.279376	0.344821	0.31247
At3g26370	-0.064699	0.0776384	0.00822422	-0.160758	-0.111929	-0.136137	0.168179	0.0899083	0.129574
At3g26560	0.0781563	0.0422638	0.0603216	-0.299067	-0.0311572	-0.158902	0.205566	-0.00247447	0.105293
At3g27070	0.193592	-0.161251	0.0270525	-0.9548	-0.613763	-0.774228	0.58952	0.926212	0.767666
At3g48780	0.0934435	-0.027799	0.0340954	-0.462736	-0.222139	-0.337428	0.139928	0.468877	0.313758
At3g61180	0.134769	0.0229474	0.0799414	-0.37949	-0.160238	-0.265703	0.343926	0.0288673	0.19498
At3g61240	0.0604027	-0.0160252	0.0226944	-0.119303	-0.0673858	-0.0931112	0.17233	-0.0329434	0.0733417
At3g61890	0.0110728	0.222577	0.120697	-0.34933	-0.196839	-0.271071	0.0411297	0.264584	0.157179
At4g04970	0.122323	-0.00724867	0.0589912	-0.287791	-0.0862635	-0.183511	0.138874	0.116764	0.127861
At4g10710	0.203098	-0.0494005	0.0823653	-0.324483	-0.0675099	-0.190283	0.0932744	0.137421	0.115517
At4g24820	-0.0201001	0.0255456	0.00290351	-0.193183	-0.05555	-0.122726	0.116744	0.125326	0.121041
At4g27760	0.211264	-0.144565	0.0442922	-0.257312	-0.144565	-0.199837	0.364449	-0.0470483	0.173322
At4g32730	0.195186	0.458221	0.332689	-0.541779	-0.568448	-0.555052	0.0797086	0.368278	0.231196
At4g36000	0.622811	0.195997	0.425131	-3.14978	-0.275309	-1.09088	1.02015	1.16008	1.09181
At4g38520	0.0270487	0.0473019	0.0372111	-0.184431	-0.0641588	-0.123041	0.0694777	0.103834	0.0867583
At5g05130	-0.102274	0.211541	0.063149	-0.521813	-0.0171928	-0.247552	0.336168	0.0691481	0.208827
At5g13550	0.201531	-0.0509967	0.0807858	-0.395463	-0.0509967	-0.212974	0.0536056	0.230007	0.144501
At5g13810	0.0357147	0.0412599	0.0384899	-0.154023	-0.154727	-0.154375	0.081885	0.149624	0.116152
At5g16750	0.222955	0.016175	0.123266	-0.581193	-0.115658	-0.329728	0.26722	0.175079	0.221884
At5g18670	0.0596528	-0.14827	-0.040566	-0.745015	-0.0914207	-0.381517	0.43991	0.458161	0.449065
At5g19140	0.0719975	-0.000437842	0.0362348	-0.11334	-0.172438	-0.142587	0.163021	0.0499543	0.107595
At5g40910	0.203168	-0.0554173	0.0796612	-0.305845	-0.159004	-0.230558	0.297495	0.00972679	0.160774
At5g43430	-0.0794528	0.134822	0.0316593	-0.275215	0.0144054	-0.123149	0.127288	0.0704781	0.0991632
At5g45300	0.237503	0.0288638	0.136952	-0.22816	-0.274703	-0.251244	0.17703	0.055983	0.117775
At5g45710	0.290941	0.176352	0.234784	-0.56704	-0.189519	-0.365966	0.0222101	0.254962	0.143275
At5g46860	0.0303444	0.040997	0.0356802	-0.214557	-0.0412574	-0.125307	0.103989	0.0787072	0.0914034
At5g50160	0.139271	0.0353436	0.088243	-0.442625	-0.0115958	-0.211073	0.135172	0.133119	0.134146
At5g54430	0.0576209	0.0395707	0.0486239	-0.273626	-0.0390802	-0.151592	0.140403	0.0716461	0.106434
At5g55310	0.125473	-0.00732644	0.0606004	-0.190728	-0.0654476	-0.126728	0.0459925	0.0899998	0.068164
At5g55760	0.0227278	-0.131832	-0.0524832	-0.608966	-0.103326	-0.334106	0.547039	0.253308	0.407637
At5g57710	0.203061	-0.129083	0.0465266	-0.541682	-0.109083	-0.309228	0.19138	0.366508	0.2816
At5g59300	0.111257	0.0176355	0.0652057	-0.161025	-0.138016	-0.149475	0.130335	0.0387922	0.0852896
At5g59450	-0.0405872	0.193764	0.081342	-0.376785	-0.293208	-0.334392	0.402017	0.106181	0.261668
At5g61190	-0.155887	0.219501	0.0439822	-0.501179	-0.257908	-0.374422	0.612032	0.0540359	0.359844
At5g62350	0.0892687	0.0372343	0.0634861	-0.453691	-0.197098	-0.319697	0.241236	0.279014	0.260248
At5g66730	0.00476482	-0.0590384	-0.0267842	-0.184798	-0.115321	-0.149641	0.230924	0.122272	0.177621
AtCg01010	0.0340917	0.551626	0.315942	-1.94628	-0.0472085	-0.704522	0.558512	0.638683	0.599155
Expression Pattern 5, 182 orfs
At1g01080	0.24544	0.10313	0.176039	0.0683955	-0.0322572	0.0189465	-0.0547696	-0.336263	-0.188662
At1g01790	0.162408	0.181454	0.171963	-0.0983912	-0.0262099	-0.0618492	0.129551	-0.363085	-0.095841
At1g02280	0.26591	-0.0714397	0.107073	0.183022	0.0438843	0.115129	0.030982	-0.474731	-0.199829
At1g03475	0.170602	-0.0557454	0.0618626	-0.00493272	0.0704047	0.0332276	-0.0163997	-0.168549	-0.0904697
At1g04170	0.157875	0.000756794	0.0814538	-0.00566239	0.0626579	0.0289016	-0.0357279	-0.182844	-0.107411
At1g05190	0.154909	0.0292295	0.0934375	0.0513891	-0.02204	0.0151418	0.0128978	-0.231042	-0.103923
At1g06360	0.26195	-0.0732741	0.104053	-0.00320292	0.08921	0.0437436	-0.0047946	-0.281267	-0.136418
At1g08540	0.339191	0.0082834	0.183203	0.113811	-0.0955293	0.0129345	0.139561	-0.540639	-0.160817
At1g08550	0.252444	0.0916598	0.174291	0.112766	0.201753	0.157945	0.289106	-1.0497	-0.230268
At1g11430	0.267829	-0.0779275	0.105284	0.0987931	0.0420495	0.0707008	-0.0144175	-0.329111	-0.1632
At1g11740	0.190875	0.00127244	0.0991862	0.125452	0.169395	0.147591	0.306899	-0.874548	-0.166122
At1g13090	0.243732	0.0348232	0.143056	-0.193733	0.255297	0.0481818	0.269624	-0.674451	-0.12653
At1g13270	0.123075	0.0991669	0.111171	0.0727024	0.0514383	0.062109	0.0387039	-0.396021	-0.162346
At1g18540	0.0790984	-0.0170396	0.0318295	0.032992	0.0413891	0.0371968	-0.00416978	-0.133778	-0.0675186
At1g20020	0.238898	0.0540852	0.149449	0.0588765	-0.0482555	0.00630421	0.110552	-0.433806	-0.136103
At1g21600	0.0528312	0.234626	0.14659	-0.100558	0.108295	0.00764423	0.153198	-0.475468	-0.127159
At1g22940	-0.0118353	0.000137594	-0.0058367	-0.0768244	0.201697	0.0691474	0.18081	-0.312453	-0.0448425
At1g25230	0.355297	0.170261	0.265743	0.452238	-0.371773	0.0982808	0.170674	-0.879746	-0.260975
At1g26230	0.256177	0.068614	0.165442	0.156231	0.150058	0.153148	-0.0700684	-0.577863	-0.301738
At1g26880	0.0997448	0.0200033	0.0604248	0.00996304	-0.0164442	-0.0031805	0.00688171	-0.121508	-0.0558853
At1g27370	0.146548	-0.099808	0.0286219	-0.0035927	0.200063	0.101826	0.24776	-0.531524	-0.0898926
At1g32060	0.191945	-0.0388941	0.0811372	0.171857	-0.103918	0.0405498	0.120085	-0.361893	-0.10087
At1g32540	0.122807	-0.0418416	0.0428304	0.0398755	-0.0047565	0.0177321	0.0970439	-0.220626	-0.0530649
At1g32550	0.0344981	0.00585259	0.0202464	0.154187	-0.0261298	0.0668439	0.127134	-0.308381	-0.0742513
At1g43670	0.406284	0.15464	0.285942	0.0813522	-0.111858	-0.0120211	0.0132952	-0.568974	-0.248661
At1g45230	0.215435	-0.156853	0.0412664	0.0908895	0.20318	0.148127	0.185292	-0.580104	-0.147232
At1g49970	0.203022	0.117092	0.160697	0.149994	-0.0836939	0.0378767	0.0163227	-0.417125	-0.184184
At1g52370	0.0463614	0.0134777	0.0300135	-0.0237232	0.0537929	0.0155553	0.109313	-0.205339	-0.0394516
At1g55490	0.246506	0.0421218	0.14793	0.0564717	0.05241	0.0544423	-0.00198184	-0.407402	-0.190497
At1g56190	0.174259	0.00127962	0.0903604	0.0462606	-0.0491888	-0.00067446	0.0265348	-0.204478	-0.0843527
At1g57860	0.158898	-0.10081	0.0348797	0.0594006	0.0173607	0.0385332	0.0356112	-0.177063	-0.0668106
At1g60000	0.264174	0.0496023	0.160874	0.0831049	0.154859	0.119428	-0.0673926	-0.497973	-0.266678
At1g60940	0.127137	-0.038389	0.0467469	0.0517838	0.177637	0.116082	0.121989	-0.462237	-0.140751
At1g62750	0.444026	0.152614	0.305665	-0.067738	0.0272441	-0.0194659	-0.0614075	-0.511827	-0.26911
At1g64630	0.00187164	0.146013	0.0757413	-0.0351905	-0.0165405	-0.025835	0.369081	-0.510463	-0.00467724
At1g66180	0.296618	0.132415	0.216851	0.0791856	-0.0364398	0.0225316	-0.0402974	-0.443154	-0.22771
At1g67700	0.227435	-0.00199244	0.117277	0.123982	-0.01036	0.0583742	0.0865467	-0.445979	-0.155283
At1g68590	0.134308	-0.0267607	0.0560201	0.173137	0.00770124	0.092789	0.0782808	-0.381926	-0.133549
At1g71500	0.258854	0.0238109	0.146114	0.0541225	-0.070661	-0.00692028	0.136178	-0.424432	-0.117066
At1g75750	0.280669	-0.0908176	0.10685	0.394845	0.0915812	0.251166	0.128444	-0.874997	-0.28774
At1g76110	0.00504223	0.444826	0.241627	0.174412	-0.141978	0.0248734	0.187668	-0.735256	-0.201217
At1g76450	0.413637	0.0616115	0.248334	0.00809892	-0.0486681	-0.0200054	0.0143979	-0.469887	-0.207519
At1g77090	0.333531	0.0542337	0.20063	-0.0197667	-0.0860304	-0.0525178	0.0888225	-0.388651	-0.130251
At1g77490	0.15385	0.133078	0.143501	0.186388	-0.072277	0.0628443	-0.015418	-0.397932	-0.194035
At1g78090	0.534144	0.382796	0.460454	-0.131777	0.103937	-0.0091113	0.0360652	-0.989172	-0.387336
At2g01320	0.146693	0.101107	0.12408	0.0176908	0.082461	0.0504395	0.15564	-0.53093	-0.147182
At2g03140	0.0176734	0.266441	0.147413	0.147413	-0.0588513	0.047964	0.00430245	-0.39205	-0.180305
At2g17230	0.285146	0.145841	0.217174	0.123986	0.10371	0.113884	0.039116	-0.732973	-0.295884
At2g21280	0.188103	0.0476538	0.119588	0.208834	-0.00237401	0.107092	0.0111014	-0.470361	-0.209637
At2g21330	0.375072	0.0874501	0.238417	0.0390922	-0.139743	-0.0475558	0.0222198	-0.401018	-0.173934
At2g21660	0.0361021	0.202332	0.12161	-0.000600073	0.143646	0.0733249	0.0910585	-0.495043	-0.172431
At2g22620	0.961738	0.777313	0.87247	0.460839	-0.909529	-0.0674089	0.332832	-2.01915	-0.4091
At2g24090	0.243369	-0.0125395	0.121082	-0.082893	0.0790332	0.00034078	0.14959	-0.39914	-0.0988423
At2g24120	0.354568	0.0187211	0.196396	0.0968599	0.335979	0.221368	0.0770969	-0.953065	-0.347925
At2g24230	0.114402	-0.0297694	0.0441165	0.0593143	0.0593143	0.0593143	0.358604	-0.617031	-0.0482654
At2g26280	0.417966	-0.210065	0.137858	0.262403	0.120865	0.193369	0.119155	-0.780055	-0.261497
At2g26360	0.163859	0.466707	0.323215	-0.0886828	0.00834168	-0.0393549	0.225698	-0.84671	-0.213073
At2g26500	0.0905446	0.00525178	0.0485286	0.0496978	-0.0280515	0.0113467	0.0683793	-0.190456	-0.0552417
At2g26930	0.206616	-0.0103894	0.10219	0.093461	-0.0166755	0.0394434	0.023704	-0.306416	-0.131934
At2g27500	0.299682	0.143148	0.223537	-0.125083	0.16247	0.0258457	-0.0324619	-0.464689	-0.232449
At2g27680	0.103389	-0.0227033	0.0417193	0.0520305	-0.0469514	0.0033883	0.116984	-0.21041	-0.0374461
At2g27960	0.377968	0.0226018	0.211199	-0.345665	0.149514	-0.0769342	0.346518	-0.625926	-0.0592755
At2g28000	0.215074	-0.0066008	0.10849	0.115167	0.105377	0.110281	-0.0596184	-0.378086	-0.210082
At2g28420	1.09607	-0.090807	0.621391	-0.253078	0.763995	0.343289	1.05504	-3.6454	0.109492
At2g30980	0.213213	0.0678432	0.142359	0.061713	-0.0305407	0.0163233	0.104091	-0.434703	-0.140298
At2g31170	0.441526	0.108041	0.284398	0.0714822	-0.0241861	0.0244408	0.0217056	-0.651447	-0.27596
At2g31360	0.17139	0.0582404	0.115924	0.0336651	-0.004911	0.0145058	-0.0466505	-0.21418	-0.127985
At2g35410	0.233272	0.103787	0.169981	0.0662319	-0.0617216	0.00367281	0.0586025	-0.414982	-0.158844
At2g35490	0.0914666	0.0282084	0.0601842	0.0272376	0.038839	0.0330502	0.00933234	-0.197799	-0.0905193
At2g36010	0.112852	-0.0036619	0.0557711	0.125236	-0.0679963	0.0318525	0.137514	-0.318864	-0.0727036
At2g36620	0.0701166	-0.036735	0.0176797	0.0249248	0.0888277	0.0572296	-0.0221056	-0.126553	-0.0733847
At2g37450	0.414239	0.658555	0.541563	0.333932	-0.0923853	0.136464	0.678602	-2.50064	-0.170325
At2g38230	0.240496	0.359632	0.301293	-0.0849376	0.00575632	-0.038878	0.102432	-0.657667	-0.228128
At2g38270	0.37078	0.0631993	0.225171	-0.0192344	0.0317824	0.00649956	-0.0785348	-0.378796	-0.220868
At2g39470	0.407145	0.0790308	0.252396	0.0911759	-0.180247	-0.0381624	0.20452	-0.654043	-0.161815
At2g40490	0.177065	-0.0394878	0.0728474	0.0269518	-0.0132723	0.00697994	0.0913696	-0.252229	-0.0702248
At2g42070	0.203411	0.011067	0.110442	0.160576	0.0270525	0.0953584	-0.00998301	-0.404239	-0.193685
At2g46470	0.0730287	0.0644671	0.0687544	0.0515277	-0.0657557	-0.00592264	0.041383	-0.167979	-0.0595034
At2g47220	1.03259	0.911957	0.973533	0.085605	0.0706549	0.0781491	0.186132	-2.70695	-0.631665
At2g47400	0.15778	-0.0660986	0.0501791	0.0540233	-0.021872	0.0165744	0.219389	-0.366113	-0.0438618
At3g02470	0.110984	0.0156926	0.064125	0.115726	0.0164565	0.066945	0.0353688	-0.301876	-0.123422
At3g02820	0.177805	-0.154492	0.0212024	-0.173538	0.28981	0.076658	0.0316341	-0.192838	-0.0762407
At3g03120	0.00711626	0.152904	0.081851	0.0168752	0.0895786	0.0536851	0.263608	-0.571333	-0.0942855
At3g04790	0.255875	-0.039758	0.115618	0.0969502	-0.0666755	0.0174557	0.0207087	-0.27886	-0.121314
At3g06483	0.0992886	0.0767227	0.0880495	0.104633	-0.0433353	0.0325447	0.177906	-0.438274	-0.0975345
At3g07670	0.0750027	0.102463	0.088798	0.0230694	0.0893469	0.0565886	0.0492697	-0.348562	-0.135976
At3g09210	0.412516	-0.209336	0.134839	0.194714	-0.0026643	0.0993984	0.171979	-0.628138	-0.173308
At3g09300	0.0191503	0.0647331	0.0421215	-0.00214905	0.0647331	0.0316797	0.00396877	-0.152223	-0.0720143
At3g10060	0.218094	0.0576291	0.140091	0.119504	0.0813546	0.100556	0.0317688	-0.527903	-0.221096
At3g11170	0.247637	0.124395	0.187332	0.0126521	-0.0868553	-0.0362438	0.0919606	-0.405461	-0.135417
At3g13120	0.108354	-0.0437261	0.0343179	0.184518	0.0159425	0.102691	0.0636872	-0.341189	-0.124595
At3g13350	0.34135	-0.161478	0.111732	0.0978384	-0.0749984	0.0140066	0.247979	-0.498806	-0.0776238
At3g13740	0.476896	-0.0551899	0.235246	0.147037	0.164697	0.155894	-0.0817159	-0.689163	-0.353702
At3g14040	0.633289	-0.662166	0.126329	-0.598036	1.08786	0.478315	0.0483269	-0.79967	-0.314243
At3g14240	0.218177	0.0555023	0.139131	0.0103096	-0.0593573	-0.0241033	0.0422586	-0.274481	-0.107436
At3g14420	0.356549	0.155812	0.259669	-0.0413997	-0.0710056	-0.0561264	-0.0315988	-0.377633	-0.194266
At3g15840	0.118343	0.038665	0.0790531	0.0531122	-0.0709369	-0.00757959	0.124891	-0.274513	-0.061034
At3g17970	0.360584	-0.0160131	0.184539	-0.325558	0.238706	-0.0160131	0.0825272	-0.378939	-0.129833
At3g19000	0.0416431	0.054563	0.0481176	-0.0101033	0.0758423	0.0335092	0.0275154	-0.192695	-0.0783926
At3g19170	0.282818	-0.136959	0.0881438	0.0564665	-0.0305667	0.0136055	0.176153	-0.375995	-0.0736661
At3g21260	0.232646	0.173463	0.203358	-0.050945	0.298389	0.13427	-0.0313165	-0.65152	-0.308344
At3g21870	0.273516	0.196863	0.235699	0.00943936	0.250769	0.135144	-0.0157977	-0.749231	-0.336401
At3g22780	-0.0290116	0.190276	0.0847946	-0.0448874	0.00800763	-0.0181974	0.382073	-0.559746	-0.0133089
At3g23710	0.0683716	-0.0272743	0.0213411	-0.120266	0.105889	-0.00276158	0.202416	-0.244086	-0.0036299
At3g24520	0.362765	0.289702	0.326696	0.152198	-0.281277	-0.0483197	-0.0742072	-0.46929	-0.258267
At3g24590	0.299629	0.0070822	0.160758	0.275512	-0.246151	0.0381319	0.178983	-0.567456	-0.14649
At3g25480	0.174636	0.0802745	0.128227	0.016931	-0.0734512	-0.0275527	0.0628537	-0.268561	-0.0933577
At3g25660	0.161179	-0.0144529	0.0760336	0.0993347	0.110928	0.105143	0.0420065	-0.412675	-0.167496
At3g25740	0.0874642	0.199537	0.144588	0.00476535	0.0874642	0.046707	0.173271	-0.586595	-0.157202
At3g25860	0.163187	-0.0297288	0.0699512	0.00205337	-0.0118989	-0.00490655	0.0372954	-0.165439	-0.0605134
At3g26070	0.23161	-0.00833575	0.116619	0.0650523	0.00496705	0.0353225	0.0688575	-0.377124	-0.136968
At3g46820	0.158274	0.17921	0.16878	0.0394374	-0.0211486	0.00946246	0.0268923	-0.393053	-0.167854
At3g46980	-0.016902	0.081183	0.0329738	0.0165391	0.081183	0.0492229	0.0675726	-0.235674	-0.076098
At3g48930	0.0654231	0.0191575	0.0424758	0.0127822	-0.0352315	-0.0110253	0.107002	-0.173942	-0.0266417
At3g52150	0.223871	-0.0509733	0.0929839	0.108346	-0.069116	0.0223424	0.085241	-0.31266	-0.100035
At3g52380	0.348363	0.0234004	0.195012	0.0214187	0.129656	0.0765515	-0.0123633	-0.532799	-0.24924
At3g54090	0.373345	-0.0629428	0.171631	0.146359	-0.0635637	0.0452129	0.0394446	-0.460505	-0.188981
At3g54400	0.124869	-0.0212628	0.0536521	0.060552	-0.0604808	0.00130399	0.050113	-0.158377	-0.0503689
At3g60770	0.136683	-0.0328321	0.0544138	-0.0431404	0.0178843	-0.0123053	0.053174	-0.135701	-0.0381756
At3g62840	-0.0180946	0.13562	0.0608086	0.0488361	0.0338501	0.0413631	0.0560316	-0.263506	-0.0949083
At3g62910	0.160301	-0.0181841	0.0738168	0.22778	-0.0263891	0.106286	0.167512	-0.545672	-0.145451
At3g63140	0.334223	-0.0508606	0.154491	0.181732	-0.161197	0.0204323	0.0909679	-0.425508	-0.144281
At4g00330	0.00496647	0.142361	0.0752985	-0.04266	0.062658	0.0109598	0.0568759	-0.230701	-0.0797589
At4g00400	0.232224	0.0116435	0.126145	-0.146288	0.314686	0.102533	0.0809461	-0.529616	-0.192274
At4g01310	0.221782	-0.0163821	0.107609	-0.0107812	-0.0123071	-0.0115441	0.0696631	-0.261571	-0.0864686
At4g04350	0.383651	0.0172236	0.21204	0.0928457	-0.0334851	0.0310624	0.111419	-0.61007	-0.204686
At4g09010	0.269535	-0.145657	0.0768238	0.0401216	0.0274349	0.0337921	0.114158	-0.326708	-0.0894999
At4g09510	0.141805	0.126375	0.134111	-0.222959	0.106291	-0.0489619	0.146183	-0.316257	-0.0665867
At4g09730	0.193486	0.0107935	0.10503	-0.0670087	0.18818	0.0662206	0.205091	-0.570567	-0.131225
At4g15110	0.200074	-0.023002	0.0928432	0.0709187	-0.0716523	0.00139342	0.0988222	-0.287814	-0.0815824
At4g16155	0.320837	-0.048771	0.147838	0.0928854	-0.0945526	0.00220818	0.168834	-0.472712	-0.116568
At4g16720	0.158063	-0.0033191	0.0796277	-0.0105556	0.0331389	0.0114571	-4.13259e-06	-0.180825	-0.0875829
At4g17560	0.140917	0.0546122	0.0984097	-0.0144873	0.0604782	0.0234823	0.0430651	-0.291802	-0.114675
At4g17600	0.277591	-0.0259917	0.13377	-0.00787756	0.0323828	0.0123928	0.0590256	-0.350177	-0.131116
At4g17810	0.0488352	0.30157	0.18073	0.308934	-0.0456825	0.142494	0.259619	-0.968867	-0.227633
At4g21280	0.245836	-0.0538118	0.103778	0.0975229	-0.143456	-0.0179413	0.116707	-0.280406	-0.0682295
At4g24770	0.155288	-0.0266433	0.0671877	0.161535	-0.0548301	0.0574049	0.135793	-0.39174	-0.103995
At4g27600	0.298889	0.0660366	0.187155	0.0641388	-0.0168997	0.0241884	-0.06801	-0.352324	-0.203174
At4g31390	0.206952	0.332484	0.271083	-0.252479	0.181559	-0.0191986	0.111103	-0.622093	-0.20941
At4g31450	0.00441265	0.00441265	0.00441265	0.143721	0.00441265	0.0757475	0.153524	-0.324756	-0.0658865
At4g33510	0.0406809	-0.00813675	0.0164785	0.0290785	-0.00752354	0.0108938	0.0374174	-0.0927095	-0.0261793
At4g34190	0.31435	-0.0640857	0.137506	0.111947	-0.0509813	0.0327818	0.167195	-0.514828	-0.133884
At4g34680	0.0475836	0.17731	0.113905	-0.011795	-0.0199003	-0.0158419	0.166637	-0.377833	-0.0800642
At4g38430	0.195418	-0.0338605	0.0853287	-0.0645574	0.0712783	0.00495831	0.0296094	-0.205167	-0.0830081
At4g39680	0.124202	-0.0333396	0.0475807	0.0586132	0.218347	0.14069	0.234824	-0.650093	-0.140824
At5g01600	0.302859	-0.137223	0.0995337	0.087278	0.0212571	0.0546452	0.0549857	-0.349995	-0.133341
At5g04130	0.179833	-0.0380161	0.0750163	-0.0260508	0.0781868	0.0270093	0.129523	-0.339493	-0.0860088
At5g05740	0.27785	-0.0693881	0.114653	0.0153716	0.158401	0.0886577	0.0239108	-0.425915	-0.183541
At5g06060	0.000294209	0.152249	0.0782714	0.111396	-0.0278897	0.0434337	0.0952668	-0.344919	-0.108102
At5g06290	0.247415	-0.0235643	0.118278	0.0322571	-0.0122881	0.0101566	0.125385	-0.388742	-0.108896
At5g08650	0.275358	-0.0242021	0.133339	0.0905183	-0.0489976	0.0224464	0.165719	-0.489264	-0.124917
At5g11450	0.208747	-0.0257683	0.0962496	0.146987	-0.0457001	0.0538578	0.197007	-0.515631	-0.115749
At5g12150	0.207593	0.00103495	0.108008	-0.0299833	-0.0709913	-0.0503414	0.111378	-0.228238	-0.0484598
At5g13120	0.197842	0.0796968	0.139979	-0.138511	0.0203105	-0.0569161	0.106288	-0.276319	-0.0723695
At5g14320	0.175146	0.00237423	0.0913444	0.153439	-0.142005	0.0132661	0.102445	-0.307846	-0.0881638
At5g16620	0.131744	0.15251	0.142164	0.03497	0.00616572	0.0206396	-0.0366786	-0.292561	-0.158954
At5g17520	0.0251339	0.0708421	0.0481689	0.0287955	0.0336635	0.0312317	-0.00762055	-0.152142	-0.0780728
At5g17560	0.212261	-0.051607	0.0863515	0.124093	-0.0244979	0.0517093	0.188292	-0.479353	-0.107249
At5g19510	0.0147769	0.0650212	0.0401179	0.0186936	0.00857989	0.0136458	0.0869929	-0.198931	-0.0488971
At5g19770	0.0445167	0.0614244	0.0529948	0.0966092	-0.0444983	0.0277797	0.0305673	-0.19266	-0.0767335
At5g19780	0.0445167	0.0614244	0.0529948	0.0966092	-0.0444983	0.0277797	0.0305673	-0.19266	-0.0767335
At5g20300	0.0913673	0.0870801	0.0892254	0.158287	-0.0788249	0.0445968	0.137706	-0.416494	-0.112945
At5g20720	0.0806843	-0.0491374	0.0172335	0.0699927	0.015825	0.043163	0.0788466	-0.2019	-0.0547078
At5g22640	0.333665	-0.0417115	0.158151	0.0843514	-0.0465099	0.0204042	0.106854	-0.464488	-0.150716
At5g22920	0.671034	0.320715	0.506481	0.118187	-0.206157	-0.0348891	0.0436784	-1.02512	-0.393929
At5g27350	0.604179	0.289675	0.45548	0.325008	-0.00598054	0.168985	-0.127246	-1.15773	-0.552373
At5g27720	0.0627529	-0.0779346	-0.00587686	0.0212671	0.0710599	0.0463783	0.177006	-0.266768	-0.0278848
At5g36790	0.301488	-0.00935406	0.154422	0.0816398	-0.0476365	0.0184484	0.00740295	-0.347326	-0.159086
At5g39740	0.0938555	-0.0447467	0.0262181	0.0469796	0.0825335	0.0648657	0.10638	-0.295482	-0.0806039
At5g39830	0.323658	-0.249754	0.0652551	0.06433	0.0891017	0.0767688	0.0513157	-0.304865	-0.11581
At5g40160	0.262463	0.0316339	0.15166	0.108871	0.123625	0.116267	-0.0547118	-0.485656	-0.254153
At5g47110	0.151659	-0.0647303	0.0475171	0.0542663	-0.00620333	0.0243486	0.0655797	-0.207795	-0.0646426
At5g47840	0.271443	-0.0176959	0.134105	0.0600315	-0.0608801	0.000841671	0.0235401	-0.287688	-0.123698
At5g48220	0.21252	0.1794	0.196055	-0.13652	0.246895	0.0678878	0.217627	-0.785435	-0.19843
At5g48630	0.181521	0.146505	0.164119	0.0658602	-0.0642458	0.00227351	0.122168	-0.473187	-0.145014
At5g49970	0.131249	0.0280577	0.080576	-0.05976	0.121522	0.0337263	0.108152	-0.343466	-0.100057
At5g51010	0.0824752	0.0543495	0.068481	0.0144048	0.144038	0.0806776	0.00558715	-0.307523	-0.14249
At5g55220	0.260711	-0.0717833	0.104022	0.241915	0.0939863	0.169845	0.00366953	-0.553986	-0.24838
At5g55280	0.0321019	0.0954201	0.0641086	0.0107839	0.0302336	0.0205415	0.0264895	-0.198196	-0.0814836
At5g55990	0.185663	0.0406675	0.114986	-0.0538831	0.161317	0.0577259	0.132982	-0.493099	-0.146359
At5g59850	0.0989821	0.0203793	0.0602162	-0.065502	0.0387499	-0.0124347	0.0269587	-0.121831	-0.0455187
At5g61590	0.221845	0.164433	0.193425	0.18449	0.0230877	0.106044	0.146823	-0.792458	-0.24769
Expression Pattern 6, 70 orfs
At1g01300	0.0786515	0.223384	0.152832	-0.488406	-0.0249766	-0.238163	0.193331	0.00234901	0.100998
At1g06090	0.131185	0.0832312	0.107407	-0.250938	0.111632	-0.0582931	0.000600603	-0.0838282	-0.0409963
At1g07590	-0.0396428	0.216012	0.0938401	-1.74746	0.564816	-0.170537	1.08711	-0.504606	0.500465
At1g13300	0.222144	0.0990556	0.161912	-0.496518	0.179709	-0.119141	0.140736	-0.178035	-0.00986311
At1g18580	0.104157	0.156552	0.130592	-0.504601	0.176207	-0.124405	-0.0111487	0.0519178	0.0207289
At1g19270	0.101719	0.086344	0.0940521	-0.178753	0.0524581	-0.0585205	0.161632	-0.235584	-0.0233481
At1g23410	-0.0401139	0.0936618	0.0283242	-0.11943	0.0017963	-0.0575437	0.133307	-0.073574	0.0335718
At1g28230	0.0709904	-0.0444867	0.014407	-0.516387	0.0219148	-0.222274	0.554348	-0.130643	0.25213
At1g31540	0.472156	0.668957	0.57391	-2.22828	0.295279	-0.473396	0.403985	0.0497013	0.237691
At1g31817	0.16067	-0.0503676	0.0590064	-0.457607	0.0569665	-0.177499	0.159403	0.113026	0.136401
At1g31970	0.199822	-0.0358321	0.0868013	-0.245657	0.0391696	-0.096226	0.124533	-0.0926406	0.0200293
At1g34460	0.235087	-0.0740814	0.088769	-0.54776	0.167625	-0.146173	0.144417	0.0393005	0.0928159
At1g50410	0.22963	-0.0996154	0.0743791	-0.371234	0.0838305	-0.125833	0.260915	-0.13051	0.0784375
At1g51650	0.136076	0.0863443	0.111424	-0.231993	0.0511194	-0.0835032	0.0298601	-0.0768284	-0.0224986
At1g53900	0.100416	-0.0350587	0.0342682	-0.169045	0.131079	-0.0111925	0.0907657	-0.127151	-0.0140822
At1g54410	0.140766	-0.00736205	0.0686029	-0.217947	0.00367196	-0.102887	0.145686	-0.0716416	0.0411104
At1g65290	0.027164	-0.0118212	0.00780349	-0.113939	0.0157524	-0.0476365	0.0860839	-0.00477642	0.041369
At1g66410	0.12836	0.0242377	0.0772382	-0.232192	0.0127984	-0.104503	0.0158034	0.0468474	0.0314094
At1g66580	0.113207	-0.07488	0.022226	-0.114237	0.0210387	-0.0450147	0.117553	-0.0677617	0.0278689
At1g67820	0.149417	0.144647	0.147034	-0.94401	0.437624	-0.0937573	0.0960672	0.00953036	0.0534475
At1g79350	0.121619	0.0985358	0.110123	-0.503144	0.137884	-0.147316	0.237851	-0.123857	0.0683034
At2g01590	0.0352587	0.109211	0.0727086	-0.201129	0.0581288	-0.0656839	0.223214	-0.241286	0.0095777
At2g02470	0.109875	0.138207	0.124111	-0.378265	0.000408596	-0.17654	0.0372996	0.0840435	0.0608611
At2g13820	0.100109	-0.0359329	0.033691	-0.191152	0.0913106	-0.0430192	-0.0148806	0.0446716	0.0152026
At2g22900	0.263527	0.216855	0.24038	-0.806228	0.15332	-0.248108	0.00964901	0.10994	0.0606658
At2g23550	0.797936	0.0609707	0.476008	-2.60199	0.205361	-0.601994	1.37783	-0.449991	0.735876
At2g24300	0.0357012	-0.0344869	0.00103415	-0.144334	0.0636381	-0.0366036	0.18851	-0.117198	0.0437387
At2g26140	0.0164819	-0.00912613	0.00373464	-0.124464	0.0335746	-0.043282	0.106928	-0.0258922	0.0420456
At2g40510	0.0601758	-0.005293	0.0278129	-0.262979	0.0799216	-0.0813647	0.238519	-0.12498	0.0681876
At2g40830	0.00193214	0.179489	0.0934405	-0.655452	0.297846	-0.101455	0.0909524	0.0316439	0.0616031
At2g45660	0.257671	0.625402	0.453221	-1.88917	0.194245	-0.500129	0.898421	-0.423507	0.383848
At2g45790	-0.04015	0.0898091	0.0262925	-0.115974	0.0313079	-0.0404542	0.100496	-0.069383	0.0180556
At3g01150	0.0692538	-0.00439798	0.0328978	-0.10676	0.089002	-0.00556098	0.0220951	-0.0722324	-0.0242978
At3g05050	0.0517413	-0.00715235	0.0225951	-0.130256	0.0980127	-0.0116122	0.152844	-0.174575	-0.00159719
At3g06700	0.19649	-0.00827927	0.097735	-0.203809	0.0807434	-0.0545287	0.0646854	-0.139322	-0.0337147
At3g12490	0.213751	-0.10955	0.0611382	-0.238704	0.172953	-0.0182428	0.0825243	-0.139602	-0.0242681
At3g19640	0.123431	-0.0844765	0.0232191	-0.806942	0.324242	-0.133213	0.418617	-0.0627818	0.197905
At3g27360	0.0374908	-0.0612626	-0.0110412	-0.192747	0.208459	0.0217581	0.0684514	-0.0713515	0.00024271
At3g46640	-0.0315898	0.54999	0.288309	-0.850819	0.15513	-0.261887	0.169897	-0.0727147	0.0536849
At3g47890	0.243909	0.109718	0.178373	-0.449013	-0.0772652	-0.251198	0.191721	-0.0309318	0.0846854
At3g55020	-0.0985026	0.186619	0.0510903	-0.388496	0.120445	-0.111698	0.325265	-0.179549	0.0948263
At3g56010	0.215164	-0.0441327	0.091333	-0.290566	0.0210596	-0.126356	0.263676	-0.186327	0.0561491
At3g60820	0.0177172	0.0513494	0.0346315	-0.308091	0.0343673	-0.126724	0.138311	0.059161	0.0992782
At3g61050	0.124323	-0.0105326	0.0584705	-0.175529	0.0391853	-0.0641811	0.0478623	-0.0293644	0.00976584
At3g62220	0.472855	0.0940294	0.295841	-0.960104	-0.025199	-0.41821	0.245215	0.114321	0.181252
At4g12600	0.0562913	-0.0281766	0.0146758	-0.105047	0.0582377	-0.0210956	0.0499474	-0.0336078	0.00877444
At4g17390	0.120329	0.012173	0.0672639	-0.207054	0.0304044	-0.0834443	0.0502914	-0.0102851	0.0203212
At4g18390	0.188447	0.175863	0.182169	-0.352446	-0.0504466	-0.193559	0.308598	-0.296264	0.0376372
At4g23450	0.195114	0.780077	0.517042	-2.97481	0.548751	-0.330955	0.734847	0.0840827	0.445851
At4g23620	0.0291231	0.0781887	0.0538643	-0.265766	0.10655	-0.0676305	0.320472	-0.298666	0.043864
At4g34720	0.0094595	0.0156288	0.0125475	-0.0941172	0.0164833	-0.0377579	0.0734482	-0.0221386	0.0264463
At4g36800	0.0787831	-0.0722669	0.00523387	-0.451459	0.0301691	-0.190639	0.364719	0.0289007	0.206559
At4g37070	0.0699261	0.129891	0.10022	-0.911066	0.208473	-0.245321	0.378784	0.0467808	0.222312
At4g39780	0.1244	0.0745968	0.0997132	-0.340441	-0.0113765	-0.166547	0.362748	-0.236936	0.0938429
At5g01950	0.31352	0.63936	0.485619	-3.38692	0.456354	-0.446477	0.5809	0.710493	0.647151
At5g04070	0.153355	-0.098563	0.0328876	-0.61857	0.257136	-0.11527	0.21193	0.0458266	0.131268
At5g07110	0.0751887	-0.0990238	-0.00928969	-0.386743	0.179758	-0.0758633	0.261039	-0.0561919	0.111126
At5g27770	0.133289	0.0246641	0.0799982	-0.186439	0.0667774	-0.0542829	0.0183832	-0.0614221	-0.0209673
At5g43920	0.180533	0.27913	0.230674	-0.521667	0.0972427	-0.179275	0.191051	-0.260542	-0.0171472
At5g46450	0.305047	0.100689	0.206483	-0.394465	0.142835	-0.100945	0.0602096	-0.238449	-0.0814048
At5g48760	0.0952143	-0.0618187	0.0188336	-0.419306	0.0800728	-0.148117	0.172811	0.117091	0.145219
At5g50810	0.193271	0.0490051	0.122941	-0.354308	0.0646163	-0.129693	0.0483513	-0.0124521	0.0182696
At5g54580	0.0891866	0.084105	0.0866479	-0.277634	0.0665469	-0.0953041	0.185869	-0.161869	0.0224518
At5g55580	0.139145	0.147741	0.143449	-0.332552	0.0983387	-0.101079	0.327473	-0.423007	0.000491725
At5g57360	0.260896	0.0303155	0.150208	-0.481796	0.0755802	-0.176356	0.253529	-0.169738	0.0573626
At5g61770	0.0214765	-0.00803873	0.00679472	-0.152802	0.106564	-0.0172984	0.0933888	-0.0659864	0.0159014
At5g61970	0.102061	0.0698687	0.0860544	-0.335975	0.135625	-0.0809893	0.0994059	-0.0858168	0.00976525
At5g63930	0.01617	0.289494	0.159295	-0.441787	-0.00762749	-0.208437	0.135047	-0.00762749	0.0654731
At5g64970	-0.0393446	0.16633	0.067155	-0.485746	0.186368	-0.110898	0.118464	0.0251228	0.0725481
At5g65830	-0.0327251	0.105578	0.0380828	-0.563729	0.242718	-0.104875	0.209635	-0.00226	0.107575
At5g67070	0.0487046	0.0272135	0.0379986	-0.0798841	-0.00215107	-0.0404945	0.036674	-0.0311981	0.00313706
Expression Pattern 7, 160 orfs
At1g02780	-0.0310087	-0.144479	-0.086628	0.205172	-0.0359287	0.0896521	-0.00737381	0.00950432	0.00109005
At1g03860	0.0683623	-0.136462	-0.0304183	0.337798	-0.0862206	0.141311	0.00770389	-0.206601	-0.0954732
At1g06680	-0.127768	-0.11254	-0.120134	0.403264	-0.0547321	0.192364	0.00561068	-0.126927	-0.0591371
At1g08360	-0.0495346	-0.0608547	-0.0551832	0.0979645	-0.0336492	0.0336582	0.0690777	-0.0245178	0.0230391
At1g11545	-0.116283	-0.0889898	-0.102572	0.24394	-0.129829	0.069126	0.123507	-0.042018	0.0431174
At1g14580	-0.107129	0.0124913	-0.0460791	0.333799	-0.0738086	0.144343	-0.0284165	-0.148156	-0.0870441
At1g15820	-0.0903302	-0.0593024	-0.0747329	0.219685	0.000244988	0.114133	-0.0688373	-0.00453292	-0.0363265
At1g16590	-0.0195656	-0.373203	-0.185576	0.961493	-0.206844	0.492496	-0.137135	-0.310467	-0.2212
At1g17470	-0.152736	-0.0989426	-0.125589	0.324577	0.000241439	0.171504	-0.0866741	0.0067989	-0.0391806
At1g20560	-0.0298304	-0.237488	-0.129926	0.446608	-0.172571	0.169984	-0.0324463	0.00119644	-0.0155267
At1g22770	-0.0476871	-0.217612	-0.130149	0.616684	-0.0975184	0.303334	-0.0611076	-0.225146	-0.140797
At1g23290	0.00344086	-0.0589809	-0.0274324	0.148219	0.008811	0.0801983	-0.041606	-0.0612535	-0.0513964
At1g24360	-0.016158	-0.0322474	-0.0241803	0.100345	-0.0292548	0.0369998	-0.0250749	0.00136481	-0.011794
At1g26670	-0.133139	0.0137241	-0.0578396	0.221657	-0.0721948	0.0821998	-0.0187676	-0.017504	-0.0181358
At1g27000	-0.194405	0.027815	-0.0790203	0.267986	-0.0997876	0.0957872	0.037099	-0.0497855	-0.00568946
At1g30120	-0.0480759	-0.0151179	-0.0315029	0.159116	-0.0315029	0.0669525	-0.0323269	-0.0342524	-0.0332892
At1g31330	-0.121412	-0.163263	-0.142186	0.347191	-0.0531406	0.160867	0.0148382	-0.0336781	-0.00921535
At1g43170	-0.0269846	-0.136325	-0.0806193	0.124372	0.0134063	0.0699554	0.0367895	-0.0128016	0.0122076
At1g47270	0.00960414	-0.0211142	-0.00567325	0.195649	-0.126279	0.043646	0.0116293	-0.0759605	-0.0315011
At1g49140	0.00815646	-0.0530618	-0.0221275	0.0743128	0.0161969	0.0455472	0.0210301	-0.0674985	-0.0225557
At1g50480	-0.056771	-0.0982844	-0.077378	0.211362	0.0247777	0.121085	0.129159	-0.219352	-0.034598
At1g51400	-0.0033936	-0.158894	-0.0790495	0.377103	-0.052381	0.178284	-0.0659174	-0.108634	-0.0871176
At1g52150	-0.176061	-0.131901	-0.153812	0.331071	-0.0588005	0.149265	0.121855	-0.0978143	0.0161974
At1g52230	-0.0817322	-0.14591	-0.113464	0.307058	0.0228191	0.171927	0.0182968	-0.126642	-0.0523533
At1g52300	-0.242624	-0.0723996	-0.155002	0.292245	0.00133186	0.15411	0.0542589	-0.0398783	0.00795799
At1g52410	-0.145714	-0.0840752	-0.114566	0.51363	-0.322094	0.155455	-0.0950882	0.0913251	0.00112703
At1g52420	-0.106782	-0.0606121	-0.0835122	0.255093	-0.0827431	0.0960413	0.0682598	-0.0812057	-0.00453843
At1g55150	0.00937208	-0.123638	-0.0556008	0.304044	-0.225872	0.0632809	0.0816511	-0.0639321	0.0106953
At1g55670	-0.20555	-0.21174	-0.208642	0.444762	-0.126033	0.187411	0.0113548	0.0683196	0.0401185
At1g56070	-0.0550929	-0.159131	-0.106175	0.194583	-0.0520154	0.0765456	0.0341967	0.033327	0.0337619
At1g58983	0.0159945	-0.134197	-0.0571476	0.125048	-0.000303798	0.0637326	0.0670809	-0.0770317	-0.00317627
At1g60950	0.00372887	-0.149092	-0.0706596	0.226174	-0.0583048	0.0909357	0.0476131	-0.0770321	-0.0133638
At1g65930	0.0212283	-0.187394	-0.0793148	0.318838	-0.177715	0.0918202	0.13298	-0.128567	0.00812478
At1g70190	-0.0696169	-0.127426	-0.0982324	0.174921	0.00935258	0.0945104	0.0366415	-0.0258728	0.00572289
At1g72190	-0.142723	-0.14961	-0.146162	0.292778	0.0796692	0.190155	0.070809	-0.156529	-0.0383867
At1g72820	-0.0142579	-0.241363	-0.123346	0.286184	-0.118281	0.0980797	0.108919	-0.034789	0.0388532
At1g74470	-0.048452	-0.0818086	-0.0650335	0.367248	-0.114566	0.146362	-0.0947795	-0.0412193	-0.0677505
At1g75990	-0.0360983	-0.119132	-0.0770181	0.189346	-0.0586332	0.0706779	0.0173408	0.00321976	0.0102975
At1g76490	0.0394255	-0.0990022	-0.0281289	0.278356	-0.126555	0.0900599	-0.127373	0.0232922	-0.0500749
At1g78300	-0.0510385	-0.0566509	-0.0538423	0.157685	-0.0630558	0.051532	0.0144198	-0.00419309	0.00514338
At1g78380	-0.0127846	-0.116782	-0.0638463	0.26099	-0.0668389	0.106367	0.0426343	-0.115482	-0.0342585
At1g79040	-0.00554816	0.00237592	-0.00158087	0.280288	-0.207778	0.0567964	-0.00614993	-0.0771777	-0.0412261
At2g02180	-0.0774991	-0.200996	-0.137926	0.408537	-0.120794	0.168013	0.21317	-0.251829	-0.000675837
At2g10940	-0.0205064	-0.124267	-0.0714536	0.284512	0.00829834	0.153005	-0.04067	-0.112689	-0.0762296
At2g25660	-0.00975222	-0.147752	-0.0771026	0.656477	-0.0272393	0.354748	-0.22348	-0.276267	-0.249632
At2g26350	-0.157828	-0.546815	-0.339251	0.711148	-0.248774	0.309594	0.205257	-0.0270878	0.093757
At2g26690	-0.0799297	-0.0158886	-0.0475544	0.391731	-0.27922	0.0949141	0.0762955	-0.12125	-0.0190987
At2g28910	0.0435976	-0.0786634	-0.0162378	0.131701	-0.0223604	0.0567259	-0.00536972	-0.0713907	-0.0380025
At2g30400	-0.103388	-0.0400622	-0.0713778	0.582753	-0.259507	0.222234	-0.0137508	-0.208881	-0.10802
At2g36930	-0.0754374	-0.0881251	-0.081767	0.154679	0.0103837	0.0843345	0.0113755	-0.0141248	-0.00131883
At2g37270	-0.0222917	-0.10958	-0.0652757	0.155928	-0.0696207	0.0475573	0.0871071	-0.0459409	0.0221161
At2g38440	-0.137293	-0.0112523	-0.0728968	0.202292	0.00132333	0.105304	0.0850989	-0.146512	-0.0260638
At2g38540	-0.0698739	-0.0617696	-0.065816	0.33155	-0.0473348	0.15451	-0.0554839	-0.105504	-0.0802776
At2g39000	-0.146091	-0.25842	-0.201162	0.364966	-0.0930443	0.15406	0.232005	-0.119324	0.067009
At2g39460	-0.0849	-0.122064	-0.103362	0.245625	-0.0630933	0.0995082	0.0703019	-0.052313	0.0102967
At2g39750	-0.250686	-0.0415444	-0.142329	0.257641	0.0633727	0.163775	0.151599	-0.191884	-0.00994439
At2g39930	-0.109775	0.0066718	-0.050377	0.395063	-0.183418	0.134624	0.149697	-0.289313	-0.0531732
At2g41530	-0.147212	0.0075638	-0.0677498	0.243026	0.00304434	0.12802	-0.0214613	-0.089938	-0.0552929
At2g44060	-0.0434939	-0.070131	-0.0567509	0.0945724	-0.036637	0.0304588	0.0604432	-0.00604407	0.0275825
At2g45180	-0.104298	-0.0727847	-0.0884555	0.318844	-0.0454591	0.148162	-0.0224899	-0.0817188	-0.0518001
At3g01090	-0.129795	-0.104574	-0.117129	0.208065	0.0255029	0.11967	0.0127542	-0.0139554	-0.000538614
At3g01540	0.0795467	-0.335855	-0.113254	0.536889	-0.0995677	0.253477	-0.0671189	-0.14741	-0.106706
At3g09200	-0.0334933	-0.0478584	-0.0406582	0.162816	-0.0593111	0.0560234	0.0231445	-0.0484526	-0.0122101
At3g10850	-0.0179529	-0.119665	-0.0679121	0.132978	0.0313721	0.0830688	0.0326147	-0.0610476	-0.0134563
At3g11710	-0.0626718	-0.0379554	-0.0502606	0.178359	-0.0649921	0.0618085	0.00388898	-0.0201141	-0.00806247
At3g11940	-0.0222917	-0.10958	-0.0652757	0.155928	-0.0696207	0.0475573	0.0871071	-0.0459409	0.0221161
At3g12390	-0.0695664	-0.0488459	-0.0591685	0.229259	-0.0146548	0.11245	-0.036184	-0.0635077	-0.0497815
At3g12640	-0.025209	-0.104957	-0.0645318	0.122169	0.0398045	0.0815744	0.0184574	-0.0513048	-0.0160022
At3g15610	0.0589167	-0.127581	-0.0313205	0.191752	-0.0757417	0.0641957	0.000802623	-0.0544604	-0.026564
At3g16120	0.205317	-0.52675	-0.114772	0.857394	0.0168722	0.497498	-0.0170753	-0.628033	-0.290452
At3g16420	-0.144611	-0.176246	-0.160341	0.403444	0.0378286	0.232187	-0.05836	-0.0698222	-0.0640801
At3g16850	0.108045	-0.183838	-0.0305276	0.351137	-0.0674286	0.15698	-0.0697852	-0.153531	-0.111051
At3g17020	-0.0828975	-0.0524982	-0.0676177	0.128074	0.0350339	0.0823037	0.0151555	-0.0436204	-0.0139335
At3g17650	-0.00050905	-0.125217	-0.0615161	0.302103	-0.088198	0.120111	0.0991475	-0.202234	-0.0436876
At3g20060	0.122119	-0.23939	-0.0473418	0.333722	-0.0809378	0.141239	0.0112272	-0.16598	-0.0746569
At3g20130	-0.0376241	-0.067219	-0.0523455	0.40102	-0.383552	0.0614235	0.0817912	-0.0303195	0.0268247
At3g20390	-0.0170535	-0.0806025	-0.048478	0.163435	0.0204145	0.0936967	0.0201856	-0.108754	-0.0428437
At3g20650	-0.141901	-0.0146874	-0.0768923	0.257055	0.0367886	0.151121	-0.0600933	-0.0809211	-0.0704697
At3g21055	-0.103134	-0.117195	-0.110147	0.36999	-0.114747	0.147884	0.0903569	-0.141904	-0.0211038
At3g23750	0.0416897	-0.138518	-0.0456021	0.315462	-0.0660665	0.137273	0.0633848	-0.231215	-0.0764081
At3g27830	-0.0215395	-0.123396	-0.0715683	0.239695	-0.067312	0.0943424	-0.0130518	-0.0204323	-0.0167377
At3g28710	-0.125182	-0.153039	-0.139043	0.357742	-0.0267423	0.17827	0.197914	-0.271947	-0.0179723
At3g43700	0.0949279	-0.258889	-0.0711611	0.471448	-0.147551	0.194894	-0.17459	-0.0159744	-0.0931037
At3g47470	-0.127716	-0.206958	-0.166793	0.480788	-0.14128	0.203026	0.120222	-0.151869	-0.0094187
At3g48070	-0.0887191	-0.0143292	-0.0510447	0.17665	-0.0442307	0.0704329	0.0898354	-0.125005	-0.0135896
At3g48740	-0.0158128	-0.118595	-0.0662888	0.306452	-0.0908755	0.121423	-0.00263204	-0.088664	-0.0450066
At3g49910	-0.160344	-0.0351788	-0.0964038	0.220708	0.0177739	0.122806	0.0827897	-0.131686	-0.0204655
At3g51280	-0.101506	-0.255629	-0.17651	0.286265	0.11634	0.203803	0.121794	-0.175395	-0.0191612
At3g52880	-0.00685247	-0.0882266	-0.0469659	0.134939	-0.0756601	0.0334784	0.049956	-0.0173591	0.0166909
At3g52930	-0.0140796	-0.0869012	-0.0500312	0.17959	0.00370831	0.0943274	-0.0525194	-0.0319143	-0.0421796
At3g54480	-0.0665919	-0.013343	-0.0397216	0.164205	-0.109084	0.0340222	0.0344656	-0.0142605	0.0103081
At3g56300	-0.436325	-0.237641	-0.333566	0.679897	0.106058	0.421322	0.453031	-0.655494	0.00271816
At3g60130	0.0584484	-0.382956	-0.145438	0.350422	0.065416	0.214945	0.0483242	-0.158007	-0.0511555
At3g60750	-0.0196616	-0.0926091	-0.0556742	0.157109	-0.0097901	0.0760711	0.0461028	-0.0840441	-0.0175034
At3g61440	0.0240933	-0.0880769	-0.0309013	0.118256	-0.0191339	0.0511967	-0.00674756	-0.0302404	-0.0184463
At3g62030	-0.0294318	-0.188832	-0.106931	0.341755	-0.108775	0.134006	0.153644	-0.188241	-0.00719494
At3g62730	-0.338467	-0.434682	-0.385773	0.91679	0.230899	0.614227	-0.132792	-0.270296	-0.199906
At3g62980	-0.15589	0.0307787	-0.0595385	0.379583	-0.04517	0.182782	-0.038686	-0.184234	-0.109625
At4g00030	-0.131064	-0.0462206	-0.0880187	0.21106	-0.0328	0.0942762	0.149605	-0.159951	0.00311348
At4g04640	0.0327543	-0.159465	-0.0601565	0.308391	-0.0880753	0.123735	0.0499004	-0.157163	-0.0499198
At4g05180	-0.0254121	-0.175639	-0.0985704	0.305582	-0.114495	0.11078	0.117351	-0.122159	0.00256104
At4g09320	-0.0106813	-0.0746137	-0.0422927	0.0991439	0.00142659	0.0511121	0.0334004	-0.0498639	-0.00763141
At4g10180	0.00973007	-0.210556	-0.0962127	0.265776	-0.123693	0.0841443	0.0928948	-0.0468142	0.0247309
At4g10840	-0.0628905	-0.0261692	-0.044413	0.190671	-0.0414271	0.0792842	-0.0759224	0.0121046	-0.031238
At4g11330	0.016834	-0.236923	-0.104472	0.232563	-0.0378893	0.103665	0.132036	-0.118166	0.0123522
At4g13660	-0.169462	-0.0649513	-0.11626	0.310616	-0.00502904	0.161409	-0.0428723	-0.0346793	-0.03877
At4g14910	-0.0411943	-0.00930484	-0.0251616	0.270008	-0.109098	0.0928713	-0.0384329	-0.0804156	-0.0592717
At4g15940	-0.0574151	-0.0191766	-0.038169	0.146809	-0.0273272	0.0623664	0.0881947	-0.135815	-0.0194665
At4g17170	-0.0698262	-0.17032	-0.119199	0.24759	-0.0078898	0.125498	0.0705995	-0.075738	-0.000714355
At4g17730	-0.0471501	-0.0471501	-0.0471501	0.236022	-0.124946	0.0667987	-0.0836119	0.058168	-0.010981
At4g19110	-0.155075	-0.144815	-0.149936	0.25678	0.0621167	0.162728	0.0673171	-0.0899443	-0.00917143
At4g24550	-0.0548516	-0.115518	-0.0848657	0.251734	-0.096943	0.0879029	-0.0229426	0.0311345	0.0043496
At4g25100	-0.0841982	-0.174886	-0.128829	0.237785	0.000297334	0.123922	0.0656097	-0.0490973	0.00939634
At4g26840	-0.131709	-0.024118	-0.0769105	0.189083	0.000276036	0.0977654	-0.0435777	0.0071711	-0.0179802
At4g28610	-0.23329	-0.23329	-0.23329	0.562957	0.0671779	0.33626	0.410179	-0.651558	-0.0251454
At4g29270	0.0441155	-0.109709	-0.0307474	0.34535	-0.128045	0.127983	0.0648103	-0.235992	-0.0777655
At4g32470	-0.0594833	-0.077647	-0.0685366	0.210675	-0.084502	0.0706226	-0.00432375	0.0102255	0.002969
At4g34660	-0.0128358	-0.0434244	-0.0280488	0.319146	-0.0399936	0.150723	0.00055329	-0.234108	-0.112011
At4g37540	0.0519457	-0.295389	-0.111294	0.338178	0.0888853	0.218909	0.015512	-0.212673	-0.0940738
At4g38800	-0.253312	0.0353394	-0.101779	0.502091	-0.144596	0.214683	-0.0228224	-0.146342	-0.0832615
At4g39640	-0.244592	0.0339624	-0.0986021	0.542387	-0.310906	0.177928	0.146239	-0.220784	-0.0256327
At5g07000	-0.28774	-0.0247057	-0.150237	0.557627	-0.28774	0.195996	-0.0891946	0.085303	0.000691149
At5g08590	0.098465	-0.133577	-0.012896	0.253351	-0.120725	0.0784035	-0.0413761	-0.0673437	-0.0543017
At5g13630	0.0637672	-0.182483	-0.0541098	0.346285	-0.0832846	0.147429	0.0621431	-0.225311	-0.0744364
At5g14740	-0.0321585	-0.123348	-0.0770327	0.264297	-0.164203	0.0658973	0.0105337	0.0338004	0.0222143
At5g14780	-0.0492699	-0.219655	-0.131949	0.466541	-0.303825	0.132178	0.224937	-0.162949	0.0439909
At5g15160	-0.216691	-0.378659	-0.295403	0.529183	-0.106133	0.246218	0.187131	-0.0425171	0.0768719
At5g15410	0.00393322	-0.208033	-0.0981605	0.580997	0.0478156	0.338899	0.0320122	-0.491384	-0.20608
At5g15610	-0.242577	-0.380698	-0.309985	0.772267	-0.00584994	0.435045	0.0346226	-0.217078	-0.0857454
At5g19680	-0.0230646	-0.0736909	-0.0481558	0.158152	-0.0563297	0.0548935	-0.0281324	0.0201283	-0.00380039
At5g20230	-0.449766	-0.0742573	-0.249829	0.502668	-0.0386332	0.257257	0.218525	-0.193245	0.0272809
At5g20570	-0.20827	-0.0523726	-0.128216	0.377054	0.0745748	0.233727	-0.0878026	-0.10989	-0.0988041
At5g20660	-0.0612482	-0.0773763	-0.0692896	0.231965	-0.0678243	0.0898433	-0.0047769	-0.0259623	-0.0153307
At5g20890	-0.0499782	-0.0255889	-0.037732	0.146731	-0.0850848	0.0354739	0.0059043	0.00488197	0.00539313
At5g20920	-0.119955	-0.0467299	-0.082878	0.181606	-0.00805844	0.0898887	0.0146085	-0.0239438	-0.00453843
At5g24270	-0.231867	-0.375153	-0.301732	0.399555	0.132451	0.272176	0.144626	-0.077767	0.0377106
At5g26940	0.0385364	-0.219145	-0.0845586	0.302464	-0.0933468	0.11809	0.0196422	-0.0613825	-0.020301
At5g32450	0.0393163	-0.167398	-0.0603417	0.317966	-0.039852	0.150122	0.0590125	-0.22349	-0.0753344
At5g35630	0.027783	-0.298625	-0.12621	0.391205	-0.0959362	0.168099	0.0308481	-0.0757145	-0.0214495
At5g36170	-0.167185	-0.280316	-0.222642	0.485319	-0.0528525	0.241183	0.179116	-0.189272	0.0066487
At5g43020	-0.104108	-0.385009	-0.237733	0.510148	0.00623745	0.280083	-0.0319586	-0.0144711	-0.0231886
At5g44030	-0.0114741	-0.0852851	-0.0479073	0.211433	-0.0332236	0.0942846	-0.0739698	-0.0114741	-0.0423831
At5g46110	0.0363167	-0.0973313	-0.0289604	0.224038	-0.0590317	0.0894344	0.00278547	-0.113206	-0.0540449
At5g46630	-0.0934775	-0.0884617	-0.0909675	0.306952	0.0143606	0.168061	0.015692	-0.161823	-0.0703366
At5g50740	-0.0946321	0.0637126	-0.0132884	0.652467	-0.520301	0.182107	-0.00430579	-0.177468	-0.0882906
At5g52040	-0.237103	-0.302755	-0.269556	0.394698	0.142937	0.274303	0.181996	-0.191724	0.00720368
At5g54760	-0.0681131	-0.0824316	-0.0752542	0.166902	-0.090678	0.043853	0.108131	-0.0388973	0.0364887
At5g54770	-0.00248188	-0.111736	-0.0560746	0.255664	-0.0620503	0.105536	0.078961	-0.168396	-0.0394225
At5g55810	-0.243249	-0.243249	-0.243249	0.423882	0.00384384	0.229096	0.131599	-0.0857081	0.0270334
At5g56180	-0.172409	-0.452359	-0.305604	0.440313	0.135287	0.295847	0.117299	-0.0802677	0.0218946
At5g59690	0.0179789	-0.0701588	-0.0254171	0.130388	0.00295946	0.0680802	0.00603125	-0.0891073	-0.0407541
At5g59880	-0.0064905	-0.027787	-0.0170992	0.198864	-0.0650442	0.0729363	-0.0412452	-0.0623672	-0.0517671
At5g63800	0.13477	-0.249353	-0.044545	0.673968	-0.466723	0.213541	0.0927707	-0.275001	-0.079428
At5g64040	0.0558673	-0.131397	-0.0347289	0.215879	-0.102257	0.0655624	0.00801097	-0.0541848	-0.0227517
At5g65430	-0.0529721	-0.0219948	-0.0374005	0.121874	-0.0141117	0.0554827	0.0855367	-0.121939	-0.0144751
At5g66570	-0.0430862	-0.118191	-0.0801498	0.251488	-0.0938188	0.0891408	0.0707311	-0.0755549	-0.000558959
At5g67380	-0.166074	-0.0323958	-0.0976872	0.370737	-0.0287528	0.184776	-0.0862827	-0.0674729	-0.0768471
AtCg00670	-0.0390746	-0.148771	-0.0928809	0.243986	0.0124553	0.13286	-0.0137736	-0.0587269	-0.0360753
AtCg00750	-0.00358401	-0.179016	-0.0886355	0.171934	0.0364665	0.10579	0.0273036	-0.0563441	-0.0139142
AtCg00830	0.00742446	-0.104489	-0.0474481	0.113038	-0.0307444	0.0429374	0.0576325	-0.045391	0.00704013
Expression Pattern 8, 95 orfs
At1g04260	-0.098273	-0.232865	-0.164	-0.019643	0.135994	0.060273	0.0738586	0.138244	0.106411
At1g06570	-0.00240527	-0.557734	-0.253513	-0.0606605	0.0853852	0.0142096	0.215604	0.300459	0.258655
At1g08710	-0.170118	-0.442849	-0.300048	0.193986	0.144891	0.169647	0.27227	-0.00711192	0.139331
At1g08940	-0.098702	-0.359846	-0.223373	0.0301752	0.112157	0.0717483	0.201302	0.110112	0.156427
At1g12360	-0.051892	-0.189978	-0.119284	0.070917	-0.0600726	0.00690826	0.0141624	0.212501	0.116738
At1g17230	-0.163862	-0.471371	-0.309439	0.364173	-0.0228502	0.183601	0.137307	0.142525	0.139918
At1g18660	0.090404	-0.491265	-0.171312	0.0298061	0.0145979	0.022222	0.0597496	0.274618	0.17118
At1g19580	0.264509	-0.441378	-0.0456866	0.0321743	0.159266	0.097119	-0.062867	0.0184828	-0.0216187
At1g21410	0.141922	-0.3975	-0.102723	0.112174	-0.0853861	0.0167729	-0.0465234	0.251238	0.110026
At1g26830	0.0644025	-0.134212	-0.031489	0.0058998	-0.00499688	0.000461949	0.027449	0.0391654	0.0333189
At1g27910	-0.0876192	-0.39622	-0.233684	0.253594	0.0404201	0.15094	0.237652	-0.0610861	0.0960017
At1g30480	-0.108135	-0.355446	-0.226498	0.0625214	0.0712737	0.0669044	0.23082	0.0943574	0.164202
At1g43190	-0.0576465	-0.176204	-0.115708	0.0933878	0.00514099	0.0499384	0.124669	0.00861428	0.0678084
At1g52890	-0.255553	-3.21903	-1.08152	1.85136	-1.84052	0.958891	0.62897	1.69745	1.25994
At1g55590	-0.343664	-0.426684	-0.384577	0.199572	0.0450331	0.124371	0.336187	0.186486	0.263277
At1g60610	0.0872774	-0.657909	-0.237728	0.231472	0.0624738	0.149446	0.135641	0.107626	0.121701
At1g61750	-0.359318	-2.20731	-1.00568	0.913701	0.0253464	0.536847	0.75616	0.640683	0.699576
At1g62380	-0.0195168	-0.328915	-0.165937	0.133116	-0.0468835	0.0459214	0.0770846	0.177148	0.127983
At1g64110	-0.353781	-1.84207	-0.91396	0.870651	0.371712	0.642644	0.318925	0.495803	0.410073
At1g73460	0.0159281	-0.196511	-0.0863849	0.0725115	-0.0132186	0.0302833	0.10626	0.0114821	0.0596493
At1g76150	0.095555	-0.182449	-0.0367611	-0.00398042	-0.0555866	-0.0295527	0.0125453	0.128528	0.0717017
At1g77130	-0.0811295	-0.255037	-0.165464	0.0995361	0.0349594	0.0676089	0.0582524	0.141036	0.100238
At1g78040	-0.00591469	-0.154633	-0.0783577	0.0881968	-0.00916004	0.0403395	0.0281382	0.0515165	0.0398741
At1g79500	-0.128035	-0.271803	-0.198129	0.021093	0.139497	0.0815097	0.159012	0.0778524	0.119003
At1g79550	-0.0170545	-0.0682916	-0.0424451	0.00632964	0.023717	0.01505	0.0136319	0.0414535	0.027609
At1g80420	-0.0750305	-0.291498	-0.179208	0.0422071	-0.000648181	0.0209387	0.201931	0.11984	0.161469
At1g80960	0.0390708	-0.813703	-0.325204	-0.165547	0.0150251	-0.0724375	0.368135	0.512525	0.442136
At1g80960	0.0390708	-0.813703	-0.325204	-0.165547	0.0150251	-0.0724375	0.368135	0.512525	0.442136
At2g03470	-0.0260283	-0.234346	-0.12643	0.0967578	0.0383276	0.0678386	0.048232	0.0743154	0.0613326
At2g16530	0.0763217	-1.1411	-0.407611	-0.141096	0.0911952	-0.0202802	0.396754	0.628523	0.517288
At2g17390	-0.0204435	-0.060186	-0.0401779	0.0453762	-0.0071035	0.0193753	0.0431332	-0.00114017	0.0211663
At2g18110	-0.057356	-0.152456	-0.104122	0.048272	0.0175504	0.0329932	0.135088	0.00738324	0.0726479
At2g23070	0.0456324	-0.153372	-0.0504408	0.00294113	-0.0373135	-0.017046	0.0248022	0.114466	0.0703306
At2g24765	-0.0821867	-0.15918	-0.12017	0.0895843	-0.0124044	0.0394907	0.159565	0.00224972	0.0830507
At2g26300	0.0601794	-0.655347	-0.253671	0.227349	0.0390617	0.136275	0.019592	0.274107	0.152455
At2g33620	0.0244086	-0.411904	-0.177316	0.00435808	0.0280245	0.0162399	-0.0122564	0.348869	0.179576
At2g33730	-0.0716094	-0.194229	-0.131616	0.140057	-0.106461	0.0220567	0.147216	0.0803939	0.114192
At2g40280	-0.0528827	-0.192676	-0.121087	0.0193	0.0497003	0.0345802	-0.0461693	0.217535	0.0916996
At2g40470	0.154497	-1.16743	-0.360077	0.639923	0.0549608	0.376889	0.247606	-0.0519544	0.105587
At2g41820	-0.256872	-0.617432	-0.425917	0.242728	0.201493	0.222258	0.0475917	0.36895	0.2172
At2g47330	0.020025	-0.39546	-0.172812	0.243376	-0.131232	0.0681966	0.0240457	0.219031	0.12483
At2g47700	-0.00658724	-0.172807	-0.0873048	0.074385	-0.0239231	0.026068	0.0432794	0.0834072	0.063483
At3g07740	-0.109222	-0.318318	-0.209985	-0.00435278	0.184961	0.0934074	0.032439	0.208119	0.122951
At3g07970	-1.18056	-3.05503	-1.83264	1.12819	1.37123	1.25482	-0.430543	1.72633	1.01822
At3g15120	0.080546	-0.332696	-0.111329	0.100174	0.0895014	0.0948477	-0.0451483	0.0966254	0.0274792
At3g21175	-0.174073	-0.786591	-0.448067	-0.0615983	0.222323	0.0873361	0.344394	0.428972	0.387303
At3g22440	-0.0992282	-0.199922	-0.148697	0.0649545	0.0330412	0.0490863	-0.0016587	0.199825	0.102598
At3g51960	-1.17195	-2.23084	-1.60635	1.06684	0.738783	0.912114	0.354119	1.13839	0.798904
At3g55200	-0.0431459	-0.337654	-0.182898	-0.0232241	0.138323	0.0598094	0.203345	0.0545699	0.130874
At3g55220	-0.0431459	-0.337654	-0.182898	-0.0232241	0.138323	0.0598094	0.203345	0.0545699	0.130874
At3g60600	-0.00557507	-0.158739	-0.0801247	-0.0116786	-0.00935067	-0.0105142	0.0501834	0.133405	0.092394
At4g00335	-0.0135479	-0.238421	-0.121607	0.104216	0.0660195	0.0852441	0.0483174	0.0303955	0.0393843
At4g00850	-0.116021	-0.704825	-0.380591	0.280675	0.057311	0.173312	0.199755	0.260127	0.230257
At4g02380	-0.105672	-0.398922	-0.244859	0.214785	-0.14864	0.0444859	0.267	0.158197	0.213625
At4g05320	-0.0171033	-0.183558	-0.097931	0.0637301	-0.00718986	0.0287055	0.135061	0.00621117	0.0720738
At4g11970	0.00627269	-0.209456	-0.0975634	0.0129365	-0.0139052	-0.000422107	0.161278	0.0392875	0.101572
At4g12040	-0.284998	-0.663815	-0.462009	0.13956	0.0442472	0.0926905	0.431342	0.324212	0.378771
At4g13180	-0.376401	-0.619689	-0.492922	0.206612	0.113316	0.160718	0.0556616	0.599593	0.353111
At4g13940	-0.0502645	-0.180608	-0.113964	0.0894269	0.00259961	0.046666	0.127113	0.00951756	0.0695132
At4g18260	-0.292843	-0.557183	-0.418967	0.259105	0.15766	0.209273	0.302959	0.123826	0.216171
At4g22350	0.118944	-0.360993	-0.101159	-0.00697178	-0.0852308	-0.0455703	0.123169	0.197169	0.160643
At4g22720	0.112615	-0.234835	-0.0506757	0.0486266	-0.0229085	0.0133025	0.0166508	0.0724193	0.0448047
At4g27320	-0.0389689	-0.280091	-0.154498	0.196625	-0.045255	0.0807482	0.114413	0.0462786	0.0807482
At4g27960	-0.0368189	-0.271399	-0.149347	0.15162	-0.0841917	0.0385271	0.0802789	0.153815	0.117515
At4g30270	-0.207414	-0.476988	-0.335913	0.21394	0.0533465	0.135876	0.0513132	0.354811	0.211028
At4g31170	0.0365744	-0.203605	-0.0785227	0.0456696	0.0112634	0.0285687	-0.0239835	0.129327	0.0547075
At4g31180	0.0438956	-0.210015	-0.0774814	0.10558	-0.0176097	0.0452994	0.00194539	0.0713309	0.0370549
At4g34710	-0.126435	-0.342819	-0.230574	0.181531	-0.139102	0.0301033	0.326472	0.0884567	0.212367
At4g37830	-0.0523036	-0.0808414	-0.0665019	0.0252921	0.0276353	0.0264641	0.027928	0.0522086	0.0401189
At4g39230	-0.131494	-0.437551	-0.276422	0.179669	-0.0739291	0.0584352	0.202132	0.251919	0.22724
At4g39400	-0.155718	-0.259482	-0.206667	0.0998422	0.0247604	0.0627901	0.220047	0.0682718	0.146155
At5g05780	0.0454957	-0.164536	-0.0557016	0.00993125	-0.0157445	-0.00284894	0.0201823	0.101703	0.0615184
At5g07100	-0.00990187	-0.69552	-0.31236	-0.141147	0.324517	0.110392	0.406703	0.0694205	0.247896
At5g18190	-0.116309	-0.26276	-0.187677	0.122247	0.126099	0.124174	0.109071	0.0199529	0.0652005
At5g24800	0.134807	-0.37308	-0.0969012	0.0810359	-0.0362179	0.0235994	0.0156596	0.160959	0.0901378
At5g27540	-0.0197628	-0.286144	-0.146814	0.0935704	0.12414	0.108937	0.0411346	0.0429136	0.0420243
At5g41940	0.256348	-0.533497	-0.0851831	0.0244985	0.0299325	0.0272179	0.104963	0.0821285	0.0935912
At5g43700	-0.108902	-0.470743	-0.278508	0.0193604	0.103563	0.0620759	0.20205	0.246604	0.224499
At5g43830	-0.165445	-0.266438	-0.215058	0.149579	0.021924	0.087163	0.0743484	0.18381	0.130117
At5g44420	-0.0674312	-1.33961	-0.567613	0.117601	-0.0852583	0.0197336	0.950803	0.307181	0.664591
At5g49460	-0.0412477	-0.0822051	-0.061581	0.01393	0.0327765	0.0233838	-0.00282415	0.079066	0.0387017
At5g50320	-0.14651	-0.227128	-0.186256	-0.00150919	0.174277	0.0890598	0.0278435	0.169705	0.100517
At5g53300	-0.0368189	-0.271399	-0.149347	0.15162	-0.0841917	0.0385271	0.0802789	0.153815	0.117515
At5g54080	-0.065764	-0.429713	-0.236292	0.211408	-0.128214	0.0515676	0.0381613	0.35409	0.204756
At5g54910	0.0170968	-0.343953	-0.152163	0.0329798	0.027705	0.0303448	0.238728	0.0170968	0.132164
At5g55300	-0.0266022	-0.348053	-0.178393	0.0514003	0.0976559	0.0747133	0.0888749	0.130544	0.10986
At5g57050	0.0743456	-2.49912	-0.701614	0.448411	-0.190999	0.163844	0.759613	1.0393	0.906223
At5g57970	-0.0945222	-0.254266	-0.172184	0.196841	-0.106836	0.0529783	-0.011152	0.258937	0.130204
At5g59010	-0.414252	-0.730674	-0.563805	0.333158	0.329868	0.331514	0.245079	0.231038	0.238075
At5g59890	-0.0351591	-0.25466	-0.140739	0.0842466	0.0386724	0.0616398	0.0491781	0.114574	0.0822468
At5g63860	0.0634383	-0.407714	-0.152989	0.00861682	0.00473107	0.00667514	0.247653	0.0686587	0.160931
At5g64220	-0.0967161	-0.342527	-0.214392	0.122983	0.0397595	0.0819715	0.0103334	0.258721	0.139866
At5g64270	-0.0193746	-0.227641	-0.119753	0.0481941	0.0943796	0.0714714	-0.0185745	0.119292	0.052005
At5g65470	0.0342064	-0.573186	-0.237758	0.089241	-0.167001	-0.0331984	0.157449	0.430062	0.300185
At5g67630	-0.0489839	-0.234249	-0.138645	0.00368182	0.0214054	0.0125705	0.0596477	0.195435	0.129138
Expression Pattern 9, 67 orfs
At1g01450	-1.04454	0.0322758	-0.407915	0.259241	0.321782	0.29085	0.838104	-0.585108	0.29531
At1g02340	-1.60592	0.101898	-0.512812	0.228655	0.320077	0.27509	1.18763	-0.558616	0.564003
At1g02390	-0.28497	0.193078	-0.0262354	0.0935423	-0.119632	-0.00911125	0.258173	-0.166325	0.0614807
At1g10070	-1.31933	0.0680766	-0.464902	-0.149401	0.737505	0.36116	0.621512	-0.143687	0.289062
At1g12280	-0.215548	0.123938	-0.0358416	0.112257	-0.07537	0.0214914	0.203165	-0.164922	0.0308293
At1g14450	-0.209463	0.118525	-0.0361687	0.167994	-0.0288045	0.0729478	0.124365	-0.186628	-0.0227677
At1g23780	-0.212192	0.11732	-0.0380492	-0.0212988	0.0687395	0.0244227	0.120501	-0.0821661	0.0227233
At1g25410	-2.21358	1.44938	0.559006	-0.991191	0.201454	-0.274984	1.39128	-0.798546	0.677187
At1g27880	-0.221525	0.222777	0.0176628	0.0532863	-0.125462	-0.0333211	0.136834	-0.0818732	0.0316208
At1g28420	-0.271097	-0.0087578	-0.133973	0.128746	0.112857	0.120823	0.0756343	-0.0421674	0.0179355
At1g53510	-0.262294	0.156535	-0.0377337	-0.0196516	0.129011	0.0565937	0.0819362	-0.0987951	-0.00560109
At1g58100	-0.17615	0.0840656	-0.0401834	0.0135881	0.134327	0.0752198	0.0911028	-0.15518	-0.0267895
At1g59580	-0.256146	0.058759	-0.0901181	0.0600384	-0.0296643	0.0158842	0.12994	0.0303176	0.0809887
At1g63370	-1.28941	0.231831	-0.336934	0.213094	-0.289406	-0.0163875	0.862597	0.095258	0.529354
At1g66390	-1.38481	0.0302243	-0.510344	-0.0628851	0.117687	0.0302243	1.23968	-0.162421	0.70265
At1g67980	-0.53757	0.126563	-0.16762	0.00991845	-0.0207784	-0.00534844	0.364875	0.0250251	0.204934
At1g69830	-0.187926	0.22996	0.0360953	-0.119257	0.111911	0.000952403	0.254413	-0.321254	-0.00489553
At1g75030	-0.640342	0.359658	-0.0553794	0.240606	-0.276186	0.00522754	0.422546	-0.200521	0.14439
At1g75890	-0.81278	0.302697	-0.149815	-0.0758143	0.509148	0.246114	0.0616892	-0.0758143	-0.00542505
At1g76700	-0.405327	0.264438	-0.0319218	-0.136782	0.247297	0.0680014	0.202543	-0.216452	0.00820314
At2g01170	-0.168878	0.255656	0.0589484	-0.0454656	-0.0125257	-0.0289017	0.131476	-0.176155	-0.014155
At2g18240	-0.367554	0.194131	-0.0595473	0.0817115	0.0300604	0.0561172	0.127308	-0.0865601	0.0243332
At2g18670	-0.242497	0.127709	-0.0455514	0.0241221	-0.053085	-0.0139648	0.110953	0.0241221	0.068191
At2g27030	-0.206262	0.0911198	-0.049922	0.0263891	-0.0537806	-0.0131388	0.0876207	0.0493574	0.0686159
At2g27150	-0.589581	0.089164	-0.210655	0.0412976	0.11582	0.0790398	0.355557	-0.0483396	0.167697
At2g34930	-0.580263	0.716167	0.208925	0.0325109	-0.0635856	-0.0147374	0.00469891	-0.206621	-0.0970949
At2g38380	-0.314756	0.0113066	-0.142533	0.143835	0.132153	0.138006	0.125472	-0.107272	0.013788
At2g42830	-2.245	0.955622	0.104584	0.175843	0.451855	0.32044	0.795157	-0.772932	0.214431
At2g43680	-0.179327	0.0386814	-0.0662085	0.0217208	0.0034789	0.0126284	0.0812539	0.0312857	0.056486
At2g44710	-1.25505	0.306451	-0.272611	0.427375	-0.0595017	0.204379	0.511851	-0.100725	0.237834
At2g46990	-1.37297	0.585206	-0.0844044	-0.153529	0.497743	0.20855	0.205102	0.00553804	0.108768
At3g10340	-0.234575	0.068494	-0.0750969	0.0760671	0.00643317	0.04167	0.058334	0.0195843	0.0390894
At3g11910	-0.171008	0.0646204	-0.0483885	-0.0133381	0.0286011	0.00778384	0.0503206	0.0374894	0.043919
At3g12290	-0.0667807	0.0297445	-0.0177113	-0.0179688	0.0284961	0.00545057	0.035972	-0.0102488	0.0130466
At3g13570	-0.199299	0.161837	-0.00746054	-0.0100994	0.0168119	0.00341898	0.0526529	-0.0298519	0.0119901
At3g16130	-0.459885	0.325102	-0.0146476	-0.0228215	-0.0228215	-0.0228215	0.495027	-0.39479	0.117659
At3g19380	-0.450531	0.00584777	-0.20437	0.123205	0.077401	0.100485	0.361609	-0.144345	0.130699
At3g19450	-0.167793	-0.00152344	-0.0822644	0.0671039	0.0263916	0.0468917	0.14093	-0.0693526	0.0396162
At3g21220	-0.20199	0.0524405	-0.0691734	0.0711945	0.133704	0.102788	0.0551347	-0.116137	-0.0279609
At3g22640	-0.90558	0.576572	0.0180071	-0.313004	-0.114675	-0.210434	0.465869	0.161534	0.321711
At3g26400	-0.162618	0.227539	0.0456096	-0.0277833	-0.0350884	-0.0314311	0.0798255	-0.0923556	-0.00369777
At3g43160	-3.03134	1.90278	0.949212	-1.03134	0.390128	-0.15219	0.587574	0.0439524	0.341218
At3g44610	-0.33164	0.303009	0.0203048	0.185652	-0.21228	0.000362979	0.144312	-0.125449	0.0157276
At3g47550	-0.19687	0.0628277	-0.0611857	0.0628277	0.0538069	0.0583244	0.120745	-0.110312	0.00983678
At3g53990	-0.14043	0.0945531	-0.0181598	-0.079275	0.0422002	-0.0172595	0.247746	-0.179329	0.0499545
At3g54350	-0.297889	0.151967	-0.0554976	0.147569	-0.027873	0.0625129	0.20796	-0.204967	0.0162191
At3g56950	-0.182886	0.133867	-0.015833	-0.0756632	0.0846509	0.00671948	0.0236062	0.00914468	0.0163936
At3g61850	-0.422822	0.309657	-0.0105873	0.135005	-0.025818	0.0568332	0.107348	-0.139029	-0.0105873
At4g12360	-1.46461	0.690275	-0.0174722	-0.225824	5.77768e-05	-0.108467	0.37266	0.378033	0.375349
At4g12750	-0.668907	0.18625	-0.178874	0.242284	-0.141045	0.0633133	0.195741	0.135368	0.165871
At4g13250	-0.316066	0.170691	-0.0522555	0.00958072	0.17235	0.0932599	0.357053	-0.445494	0.0108806
At4g14570	-0.228785	0.168668	-0.0164147	0.15046	-0.117224	0.022817	0.0558018	-0.042709	0.00738706
At4g15750	-0.664916	0.131551	-0.212403	-0.0197587	0.0807019	0.0313459	0.393544	0.0346895	0.225245
At4g17230	-0.206275	0.0767864	-0.0578133	0.110057	-0.0262505	0.0435127	0.0721892	-0.032838	0.0206312
At4g25300	-0.995488	0.231922	-0.255008	0.0899032	-0.143587	-0.0221235	0.938514	-0.294147	0.450014
At4g39570	-0.135558	0.109785	-0.0076775	-0.00880093	-0.0614347	-0.0348777	0.14455	-0.0544595	0.0484739
At5g04610	-0.460769	0.287692	-0.0385363	0.242838	0.0880196	0.167504	0.030534	-0.22548	-0.0918014
At5g12030	-2.50864	0.398249	-0.421179	0.614741	0.739286	0.678357	1.44556	-1.56111	0.614741
At5g25060	-0.454919	0.126423	-0.135162	0.286378	-0.0507702	0.127631	0.124004	-0.0589908	0.0354062
At5g43190	-0.347204	0.0792386	-0.118283	0.0886743	0.0716455	0.0801851	0.0620978	0.035022	0.0486233
At5g43310	-0.177265	0.145972	-0.00661214	-0.0143894	0.0504185	0.0183784	0.081763	-0.09456	-0.0037063
At5g49650	-0.246809	0.150774	-0.034365	0.0192653	-0.0608762	-0.0202492	0.111425	0.016225	0.0646102
At5g54960	-0.619777	0.216724	-0.14173	0.0574159	0.159196	0.109203	0.420637	-0.304736	0.103067
At5g60120	-0.138353	0.101052	-0.0136907	0.0607874	0.00293276	0.03215	0.0585172	-0.0897043	-0.0136907
At5g60170	-0.174025	0.0297963	-0.0685179	0.0278942	0.107499	0.0682456	0.128952	-0.126649	0.00680468
At5g60410	-0.180984	0.293069	0.0754265	0.0313515	-0.0498725	-0.00868903	0.223338	-0.349004	-0.0346347
At5g67250	-0.277595	0.0604153	-0.0987129	0.0688081	0.0400715	0.0545116	0.175245	-0.0772561	0.0545116
Expression Pattern 10, 126 orfs
At1g03310	0.121132	0.299144	0.212882	-0.295626	0.173258	-0.0422188	-0.12592	-0.186674	-0.155977
At1g07010	0.286958	0.194646	0.24154	-0.227501	0.198047	0.000906362	-0.21954	-0.243557	-0.231499
At1g07990	0.167508	0.101706	0.134982	-0.00817166	0.00422944	-0.001958	-0.203488	-0.0631786	-0.131629
At1g08980	0.255567	0.22216	0.23896	0.0424326	-0.00953314	0.0166838	-0.154663	-0.358584	-0.253023
At1g11860	0.248212	0.111956	0.181692	0.0184296	0.047656	0.0331162	-0.122333	-0.30701	-0.211719
At1g12240	0.228308	0.081199	0.156628	-0.0738608	0.120786	0.0267433	-0.228565	-0.131844	-0.179394
At1g13420	0.681882	1.07404	0.891243	-0.342307	0.714075	0.280487	-1.15315	-1.04711	-1.09916
At1g14150	0.473302	0.33481	0.405717	-0.114131	0.154148	0.0262356	-0.181834	-0.686171	-0.412076
At1g17050	0.296258	0.165454	0.232338	0.116457	-0.160282	-0.0152869	-0.101134	-0.325052	-0.208753
At1g17100	0.151109	0.445227	0.30565	-0.188813	0.172127	0.00291517	-0.201277	-0.392988	-0.29395
At1g19770	0.275407	0.576383	0.433729	-0.101689	-0.0520964	-0.0766802	-0.466288	-0.240034	-0.34873
At1g22840	0.088527	0.0643981	0.0765136	0.006265	0.0137399	0.0100072	-0.0481593	-0.12515	-0.0861413
At1g23090	0.279767	0.204235	0.242495	-0.0800158	0.109274	0.0177316	-0.421014	-0.100563	-0.25191
At1g23820	0.144323	0.0343935	0.0904057	-0.0316446	0.0233452	-0.00388792	-0.102813	-0.0685451	-0.0855768
At1g30440	0.102252	0.155178	0.128957	-0.0125835	0.133989	0.0625631	-0.259035	-0.122281	-0.189039
At1g31190	0.25725	0.133077	0.196499	-0.14868	-0.016288	-0.0809662	-0.120079	-0.107191	-0.11362
At1g31770	0.488828	0.496019	0.492428	-0.0311983	-0.0019634	-0.0165069	-0.341361	-0.614685	-0.47156
At1g47290	0.123586	0.356563	0.244772	0.0393727	-0.011441	0.0141895	-0.231567	-0.27993	-0.255546
At1g48600	0.203722	0.104464	0.154946	-0.109312	0.110884	0.00498274	-0.0849411	-0.229387	-0.155358
At1g49760	0.19951	0.222534	0.211068	0.031413	-0.0173007	0.00726117	-0.247238	-0.18928	-0.217968
At1g51500	0.21522	0.12028	0.16853	-0.00991821	0.0801821	0.0358353	-0.125574	-0.282603	-0.201953
At1g53230	0.0487662	0.214244	0.133876	0.0539141	-0.129401	-0.0348339	-0.0962343	-0.0948095	-0.0955219
At1g53240	0.190355	0.0600892	0.126692	-0.0925731	0.106377	0.0103284	-0.149198	-0.118369	-0.133701
At1g64860	0.262116	0.192644	0.227799	-0.106586	0.333743	0.130313	-0.454929	-0.241064	-0.344037
At1g65590	1.38921	0.234322	0.924366	-1.13652	0.677928	0.038926	-0.74657	-0.672569	-0.709095
At1g67710	0.987488	1.12134	1.05597	-0.723005	0.0270164	-0.299794	-0.723005	-0.723005	-0.723005
At1g68010	0.302915	0.208073	0.256273	0.07994	-0.0473879	0.0176804	-0.179899	-0.36712	-0.270475
At1g68190	0.664384	0.00173394	0.370774	-0.100584	0.138693	0.0240094	-0.391519	-0.3413	-0.366191
At1g68570	0.148372	0.72455	0.465036	-0.235164	0.354982	0.0898766	-0.594178	-0.438981	-0.514494
At1g68660	0.316659	0.328404	0.322544	-0.248578	0.0543075	-0.0892014	-0.166473	-0.290506	-0.227157
At1g70310	0.162498	0.160275	0.161387	0.0757755	-0.0705887	0.00444825	-0.147447	-0.181818	-0.164529
At1g72030	0.283273	0.40922	0.347621	0.16055	-0.148141	0.0144449	-0.314709	-0.396994	-0.355265
At1g72970	0.440164	0.0550253	0.260409	0.0433357	0.00165913	0.0226476	-0.254345	-0.294575	-0.27432
At1g77530	0.454708	1.02962	0.770613	0.312689	-0.199517	0.0791991	-1.27227	-0.402334	-0.772702
At2g01830	0.322767	0.358484	0.340736	0.116462	-0.0834162	0.0199816	-0.458653	-0.260294	-0.356067
At2g03240	0.0204496	0.183199	0.104118	-0.0580521	0.0791635	0.0121865	-0.111223	-0.116155	-0.113687
At2g18160	0.189233	0.337663	0.265356	-0.0122681	0.0857973	0.0375977	-0.277281	-0.325104	-0.300994
At2g20180	0.549564	0.485838	0.518053	0.0841832	-0.536045	-0.192854	-0.392255	-0.215377	-0.301107
At2g23340	0.511192	0.0937024	0.317496	-0.00443162	-0.0434741	-0.0238208	-0.419469	-0.151773	-0.279421
At2g25210	0.103217	0.102857	0.103037	-0.0788956	0.0677738	-0.00369835	-0.0862856	-0.109941	-0.0980644
At2g26080	0.168439	0.18901	0.178761	-0.00191455	0.119165	0.059895	-0.308576	-0.168133	-0.236646
At2g26190	0.409326	0.316913	0.36386	-0.368494	0.0233361	-0.159317	-0.124341	-0.267254	-0.194029
At2g27810	0.0474778	0.30184	0.180257	0.0562816	-0.0673556	-0.0042128	-0.166294	-0.176571	-0.171423
At2g28930	0.269108	0.172122	0.22143	0.00517935	-0.0569206	-0.0255366	-0.269703	-0.121815	-0.193864
At2g32480	0.116162	0.234526	0.176557	0.00555791	0.141437	0.075097	-0.240464	-0.259114	-0.249759
At2g37220	0.210056	0.0994393	0.155807	-0.0989831	0.048763	-0.0232194	-0.0174297	-0.246849	-0.127584
At2g37430	0.888633	1.07204	0.983247	-0.202023	0.149776	-0.0154264	-0.668261	-1.27	-0.937982
At2g39800	0.290868	0.138722	0.2168	-0.125459	0.0876864	-0.0149532	-0.264426	-0.132358	-0.196881
At2g40140	0.261516	0.723964	0.511191	-0.272693	0.137327	-0.0531655	-0.656021	-0.22668	-0.425438
At2g40900	0.31845	0.110007	0.217989	-0.0230185	0.155986	0.0692581	-0.260863	-0.30503	-0.282778
At2g44120	0.139352	0.00105741	0.0718611	-0.0783245	0.0635536	-0.00564215	-0.0556366	-0.0722839	-0.0639364
At2g44300	0.142734	0.36624	0.25881	-0.0940275	0.0438938	-0.0234194	-0.155028	-0.309164	-0.230038
At3g13730	0.346774	0.577071	0.466513	-0.495685	0.318759	-0.031738	-0.207988	-0.588131	-0.385575
At3g14067	0.210934	0.334211	0.273889	-0.147174	-0.0443005	-0.0948204	-0.17014	-0.185032	-0.177567
At3g14350	0.223253	0.202723	0.213024	-0.0179925	0.0537205	0.0183096	-0.336834	-0.127715	-0.228488
At3g15820	0.0743798	0.137846	0.106462	-0.117175	0.11205	0.00198539	0.0106543	-0.224202	-0.102
At3g16250	0.347059	0.380915	0.364086	-0.0932044	0.270934	0.100323	-0.282827	-0.637844	-0.449442
At3g20015	0.641334	0.79872	0.722172	0.0462231	0.356563	0.209722	-1.11524	-0.742581	-0.916912
At3g23390	0.0575371	0.0262051	0.0419559	-0.0199165	0.0126743	-0.00352859	-0.0152884	-0.0614529	-0.0381861
At3g23480	0.437098	0.318192	0.378869	-0.0657831	-0.187203	-0.125216	-0.259353	-0.244631	-0.251973
At3g26590	0.0550174	0.185078	0.121513	-0.0614682	0.033689	-0.013105	-0.0614682	-0.15283	-0.106426
At3g28040	0.253836	0.0705081	0.165082	-0.00821776	0.143835	0.0698109	-0.282871	-0.180964	-0.231018
At3g28050	0.310538	0.316645	0.313594	0.0609054	0.0206603	0.0409231	-0.432747	-0.277488	-0.35303
At3g28345	1.07218	1.40608	1.24877	-1.70542	1.52064	0.667129	-1.12046	-1.70542	-1.3835
At3g45070	0.303563	0.68933	0.509302	-0.0160793	0.128673	0.0581118	-0.61059	-0.505317	-0.556994
At3g47430	0.792404	0.575075	0.687828	-0.211951	0.10193	-0.0464908	-0.723785	-0.543945	-0.631065
At3g48760	0.0437744	0.0496224	0.0467013	-0.0160472	0.0153693	-0.000253359	-0.0258533	-0.0670225	-0.046291
At3g50930	0.357508	0.86891	0.635752	-0.306117	0.0398634	-0.12278	-0.767903	-0.230758	-0.474475
At3g51240	0.275322	0.481907	0.382309	-0.206575	0.295265	0.066057	-0.454432	-0.408546	-0.431307
At3g52370	0.245673	1.09028	0.728921	0.164704	-0.22108	-0.0153306	-0.595735	-0.734149	-0.663283
At3g53240	0.770054	0.639404	0.706207	-0.0816952	0.327696	0.137473	-0.36745	-1.35377	-0.777914
At3g55610	0.290868	0.138722	0.2168	-0.125459	0.0876864	-0.0149532	-0.264426	-0.132358	-0.196881
At3g56060	0.0318298	0.421332	0.239686	0.0318298	-0.0417266	-0.00447989	-0.221116	-0.231205	-0.226151
At3g60210	0.12955	0.0507508	0.0906888	-0.0170173	0.0111247	-0.00287713	-0.0438384	-0.131418	-0.0869636
At3g61860	0.224955	0.0683158	0.14876	1.79609e-05	-0.0487973	-0.024183	-0.120783	-0.125264	-0.123022
At3g62410	0.537377	0.508242	0.522883	-0.28624	0.113727	-0.0724407	-0.0056368	-0.924717	-0.393194
At4g01460	0.273673	0.050235	0.166276	-0.170937	0.323001	0.097068	-0.314429	-0.179499	-0.245387
At4g03110	0.371345	0.148747	0.264335	-0.355191	0.281802	-0.00181972	-0.280732	-0.192529	-0.235957
At4g13020	0.069596	0.142042	0.106274	-0.0574096	0.00325314	-0.0267595	-0.137791	-0.0209945	-0.0782107
At4g17460	0.857697	0.763337	0.811288	0.136192	-0.355909	-0.0889775	-0.67951	-0.736429	-0.707689
At4g18810	0.299096	0.22037	0.26027	-0.159974	0.094423	-0.0271757	-0.167945	-0.290935	-0.22813
At4g19030	0.988335	1.31579	1.16133	0.0898624	0.716193	0.436753	-1.64504	-1.4951	-1.56812
At4g20820	0.513989	0.495373	0.504711	-0.171501	0.0359417	-0.0640542	-0.186451	-0.705324	-0.422685
At4g20840	0.209118	0.180661	0.194959	-0.0973951	0.022899	-0.0359947	-0.129104	-0.187256	-0.157887
At4g23670	0.076233	0.139513	0.10822	-0.0223559	0.00259791	-0.00982465	-0.153673	-0.0432862	-0.0974244
At4g24120	0.198399	0.185921	0.192173	-0.0445871	0.176492	0.0701828	-0.137574	-0.385012	-0.255995
At4g25390	0.0793472	0.201074	0.141494	-0.00445694	-0.0861072	-0.0447044	-0.130615	-0.0607643	-0.0952668
At4g26400	0.148562	0.214096	0.181701	0.0980254	-0.163467	-0.0268044	-0.218448	-0.0840048	-0.149661
At4g27520	0.186193	0.0657429	0.127224	-0.0295539	0.105957	0.0397925	-0.171135	-0.159111	-0.16511
At4g28365	1.44167	1.2812	1.36366	-0.806261	0.959274	0.331242	-1.12819	-1.95826	-1.48433
At4g28550	0.888741	0.733463	0.81319	-0.299704	-0.202406	-0.250235	-1.02553	-0.141006	-0.516515
At4g35040	0.164241	0.231112	0.198064	-0.119691	0.0345237	-0.0405243	-0.249015	-0.0647614	-0.153949
At4g35410	0.21182	0.0575986	0.136769	-0.0399566	-0.00476742	-0.0222549	-0.127667	-0.0985208	-0.11302
At4g36380	0.187895	0.970985	0.631933	-0.112228	0.0933203	-0.00579649	-0.576175	-0.601266	-0.588666
At4g36690	0.163421	0.0642018	0.114664	-0.157398	0.0565738	-0.0464492	-0.0199953	-0.110486	-0.0645314
At4g38770	0.245572	0.10836	0.178597	-0.0597684	0.108136	0.026625	-0.236606	-0.168675	-0.202241
At4g38840	0.670895	0.37543	0.530714	0.0652663	0.233402	0.151783	-0.795534	-0.559345	-0.672612
At5g02120	0.227355	0.154932	0.191598	-0.0217804	0.158102	0.0709625	-0.258837	-0.261941	-0.260389
At5g03380	0.445454	0.349357	0.398205	-0.00875108	-0.0118992	-0.0103242	-0.338563	-0.436688	-0.386791
At5g04280	0.134559	0.0819345	0.108487	-0.0826187	0.0499526	-0.014811	-0.0944848	-0.0905184	-0.0925002
At5g05270	0.306316	0.424279	0.366503	-0.214973	0.275254	0.0508629	-0.569772	-0.241918	-0.396552
At5g07580	0.520783	0.44401	0.482907	-0.196018	0.0192053	-0.0843966	-0.297343	-0.495928	-0.393221
At5g13200	0.140137	0.84533	0.535399	-0.245056	0.04671	-0.0918097	-0.196146	-0.635431	-0.399133
At5g13650	0.382936	0.213284	0.300602	-0.103732	0.0488332	-0.0254333	-0.101689	-0.449613	-0.265188
At5g15780	0.0927804	0.445221	0.279736	-0.00372235	0.0340951	0.0153101	-0.194968	-0.38268	-0.285773
At5g16010	0.0218764	0.1818	0.104054	-0.0667542	0.104671	0.0215026	-0.112584	-0.132204	-0.122361
At5g16710	0.166928	0.0373041	0.103571	-0.129776	0.0730526	-0.0248001	-0.0470884	-0.103951	-0.0752399
At5g17170	0.111641	0.462493	0.297707	-0.278543	0.123573	-0.0635195	-0.185391	-0.25042	-0.21754
At5g18410	0.0940509	0.334648	0.219359	-0.0300236	0.0806303	0.0263639	-0.282325	-0.201405	-0.241298
At5g18960	0.200278	0.290791	0.246244	0.0614772	-0.13076	-0.0314421	-0.150478	-0.274806	-0.211304
At5g20110	0.0390732	0.345475	0.200393	-0.0838735	0.00410959	-0.0392115	-0.149514	-0.161139	-0.155314
At5g20630	0.117467	0.143527	0.130557	-0.0579267	0.14916	0.0493292	-0.157555	-0.197279	-0.17728
At5g21060	0.230915	0.154549	0.193237	-0.0587476	0.0245721	-0.0164864	-0.249189	-0.104053	-0.174797
At5g25520	0.166759	0.0771475	0.122649	-0.098702	0.0963697	0.00212812	-0.0962753	-0.148114	-0.121962
At5g27450	0.31307	0.0164212	0.172357	-0.104236	0.0760311	-0.0112888	-0.24161	-0.0683591	-0.152385
At5g28080	0.806071	1.49997	1.19434	-0.696429	0.763002	0.210461	-1.237	-1.28139	-1.25902
At5g35840	0.329334	0.155743	0.245148	-0.0963203	0.152987	0.0337117	-0.350203	-0.1982	-0.2722
At5g36160	0.448888	0.0836335	0.277789	0.0477563	0.0133282	0.030645	-0.215278	-0.3878	-0.298962
At5g49910	0.198699	0.191947	0.195327	-0.030111	0.18793	0.0830253	-0.23627	-0.315303	-0.275245
At5g51820	0.0516431	0.224537	0.140678	-0.0138229	0.0995003	0.0439517	-0.138312	-0.226462	-0.181713
At5g53170	0.28674	0.269565	0.278178	-0.186361	0.0690825	-0.052993	-0.237622	-0.205246	-0.221343
At5g57180	0.535459	0.269534	0.408615	-0.328111	0.191707	-0.0449159	-0.235599	-0.455381	-0.341309
At5g58260	0.0756844	0.539763	0.326304	-0.0157629	0.20433	0.0984763	-0.295821	-0.526445	-0.40653
At5g58800	0.253693	0.271883	0.262817	-0.136766	0.0447761	-0.0431412	-0.228077	-0.207455	-0.217729
At5g66320	0.273348	0.257432	0.265412	-0.107426	0.213323	0.0618442	-0.336705	-0.305972	-0.321257
AtCg00070	0.198618	0.26958	0.234535	-0.0271882	-0.104931	-0.0655364	-0.0594815	-0.280044	-0.165552
Expression Pattern 11, 123 orfs
At1g01230	-0.111646	-0.189396	-0.149997	-0.063266	-0.120758	-0.0917255	0.126448	0.355062	0.245278
At1g01470	-0.235724	-0.320664	-0.277569	-0.39176	-0.154721	-0.268377	0.448376	0.648521	0.551917
At1g03590	0.0947033	-0.339942	-0.106313	-0.405177	-0.223297	-0.311373	0.528162	0.330516	0.432721
At1g04820	-0.00284693	-0.115361	-0.0580075	-0.0847275	-0.0257714	-0.0549481	0.0831907	0.144368	0.114104
At1g05010	-0.146221	-0.256571	-0.200342	-0.0502342	-0.311604	-0.175008	0.402542	0.357326	0.380111
At1g12920	0.0275314	-0.0906326	-0.0303404	-0.0897047	-0.0247137	-0.056843	0.063566	0.112763	0.0883739
At1g16010	0.048291	-0.0869414	-0.0177414	-0.0225073	-0.0769917	-0.0494925	0.0437387	0.0930432	0.0686014
At1g16300	-0.0168417	-0.143898	-0.0789717	-0.0884898	-0.0422271	-0.065173	0.124849	0.165456	0.145296
At1g17180	-0.339228	-0.535788	-0.434163	0.0521581	-0.544777	-0.215654	0.945472	0.381222	0.690758
At1g19440	-0.0498219	-0.186516	-0.116551	-0.130618	-0.0612078	-0.0954953	0.220484	0.20631	0.213415
At1g23260	-0.0145178	-0.0593314	-0.0367508	-0.0782556	-0.0173984	-0.0475063	0.0988917	0.0702343	0.0846343
At1g26930	0.0901424	-0.474852	-0.164872	-0.0468587	-0.367406	-0.198248	0.30894	0.464394	0.38876
At1g29950	-0.250961	-0.277596	-0.264217	-0.0678037	-0.223082	-0.143355	0.289938	0.524886	0.41219
At1g30720	-0.202871	-0.669997	-0.41761	-0.0793883	-0.246498	-0.160525	0.535322	0.648532	0.593037
At1g30730	-0.202871	-0.669997	-0.41761	-0.0793883	-0.246498	-0.160525	0.535322	0.648532	0.593037
At1g44810	-0.0762883	-0.146957	-0.11119	-0.164683	-0.248312	-0.205892	0.449056	0.182391	0.321875
At1g45332	0.0504824	-0.264556	-0.0984544	-0.122823	-0.0671448	-0.0947155	0.0820581	0.313006	0.202148
At1g47830	0.0263496	-0.116157	-0.0431451	-0.143992	-0.10974	-0.126764	0.160595	0.181678	0.171176
At1g49820	0.0104417	-0.15935	-0.0719577	-0.184799	-0.0890175	-0.136114	0.124358	0.294502	0.211936
At1g52190	-0.169057	-0.454757	-0.304847	-0.0714289	-0.971656	-0.452436	0.653734	0.957082	0.813366
At1g54100	-0.228356	-0.370489	-0.297673	0.0929118	-0.257536	-0.0716971	0.387633	0.367569	0.377636
At1g54130	-0.12084	-0.631613	-0.353739	0.146337	-0.365009	-0.0867983	0.558968	0.380298	0.472397
At1g54290	-0.0401275	-0.136461	-0.0874903	-0.0609858	-0.125435	-0.0928504	0.102701	0.258138	0.182512
At1g56210	-0.0714075	-0.237541	-0.152084	-0.0969426	-0.0265533	-0.0613186	0.135718	0.293411	0.216718
At1g59610	0.0385164	-0.170539	-0.0622283	0.0501131	-0.209515	-0.0738689	0.0945238	0.189965	0.143033
At1g76010	-0.0319818	-0.0254529	-0.0287135	-0.0517476	-0.0844005	-0.067982	0.0486132	0.144376	0.0972888
At1g76180	-0.188411	-0.280396	-0.23367	0.0324553	-0.150676	-0.0562068	0.303468	0.281106	0.292331
At1g76680	0.0314827	-0.394619	-0.165894	-0.149032	-0.0158376	-0.0808982	0.266253	0.250265	0.258281
At1g77180	-0.111846	-0.252444	-0.180433	0.0679685	-0.149253	-0.0365575	0.173204	0.267986	0.221374
At1g77840	-0.0801417	-0.193063	-0.135498	-0.0793549	-0.0754272	-0.0773899	0.11329	0.311688	0.215897
At1g78970	-0.421538	-0.524131	-0.471923	-0.404756	-0.128251	-0.259889	0.606877	0.862998	0.740613
At1g79530	-0.0168417	-0.143898	-0.0789717	-0.0884898	-0.0422271	-0.065173	0.124849	0.165456	0.145296
At2g14720	-0.122972	-0.0932394	-0.108029	-0.0273	-0.0570904	-0.0421182	0.0879663	0.211649	0.151133
At2g17500	0.0131721	-0.330277	-0.148356	-0.140658	-0.264262	-0.201137	0.230579	0.480172	0.360766
At2g19080	-0.0461696	-0.190649	-0.116601	-0.157269	-0.162779	-0.160021	0.390556	0.16209	0.280842
At2g19790	-0.0326885	-0.0364946	-0.0345901	-0.0634206	-0.106203	-0.0846532	0.157783	0.0805728	0.119694
At2g21240	-0.080171	-0.129337	-0.104545	-0.155542	-0.0681366	-0.111178	0.253607	0.178674	0.216627
At2g24360	-0.128712	-0.181583	-0.154905	-0.0654526	-0.0632753	-0.0643635	0.158185	0.279822	0.220284
At2g29020	-0.0372112	-0.12127	-0.0786283	0.0516722	-0.123146	-0.0330904	0.0872624	0.140357	0.114054
At2g30070	-0.240348	-0.608206	-0.412584	-0.316192	-0.318243	-0.317217	0.730187	0.744994	0.73761
At2g32260	-0.0338129	-0.225123	-0.126299	-0.0338129	-0.0384945	-0.0361518	0.166601	0.162528	0.164566
At2g33340	-0.0151987	-0.162421	-0.0869331	0.0122147	-0.0447569	-0.0159893	0.03263	0.174924	0.105531
At2g34390	-0.286674	-0.547326	-0.411122	0.023281	-0.372648	-0.161144	0.627352	0.542655	0.585625
At2g36910	-0.131743	-0.240833	-0.185258	0.083765	-0.333551	-0.109857	0.248177	0.362717	0.306583
At2g37090	0.0439212	-0.200315	-0.0730346	-0.272106	-0.494499	-0.379021	0.332352	0.58079	0.461912
At2g44860	0.0959296	-0.160205	-0.0264612	-0.182182	-0.104229	-0.142679	0.221979	0.124018	0.173829
At2g45030	0.0504824	-0.264556	-0.0984544	-0.122823	-0.0671448	-0.0947155	0.0820581	0.313006	0.202148
At2g45140	-0.061199	-0.0413302	-0.0512303	-0.0442565	-0.0866149	-0.0652803	0.0609314	0.171635	0.117345
At2g46800	-0.0435347	-0.16149	-0.101307	-0.0868849	-0.14148	-0.113924	0.145857	0.285431	0.217331
At3g02520	0.0127317	-0.088067	-0.0367879	0.0131236	-0.0884875	-0.0367879	0.0655357	0.0839616	0.0747777
At3g04630	0.0644134	-0.374592	-0.138455	0.0625838	-0.350015	-0.129016	0.170153	0.403428	0.2915
At3g05360	-0.180814	-0.0928659	-0.13617	-0.432352	-0.533993	-0.482278	0.887611	0.333759	0.637102
At3g07010	-0.0516594	-0.206872	-0.127179	-0.103557	-0.231719	-0.166215	0.222553	0.367699	0.296951
At3g07410	-0.0909831	-0.357498	-0.218095	-0.300557	-0.178567	-0.238273	0.365461	0.555112	0.4634
At3g09270	-0.0685889	-0.390192	-0.220448	-0.272595	-0.20039	-0.23604	0.335369	0.586495	0.46639
At3g12610	-0.0204934	-0.0613555	-0.04078	-0.0999068	-0.17532	-0.137121	0.173635	0.183011	0.178331
At3g14050	-0.04352	-0.230151	-0.13382	-0.0184288	-0.182923	-0.0983329	0.318347	0.151496	0.237332
At3g14610	-0.228246	-0.316566	-0.27173	-0.184371	-0.566544	-0.36284	0.569777	0.715856	0.644665
At3g15460	-0.0503821	-0.221876	-0.133583	-0.0462065	-0.0756936	-0.0608749	0.176186	0.216133	0.196298
At3g15730	-0.0588028	-0.0887987	-0.073723	-0.0322659	-0.0855086	-0.0586416	0.0932644	0.171542	0.132934
At3g18030	-0.0273264	-0.461066	-0.227957	-0.172655	0.00573942	-0.0807026	0.38994	0.251601	0.322427
At3g20300	-0.588061	-0.877568	-0.725565	-1.1406	-1.87757	-1.46253	2.22863	2.21929	2.22397
At3g22110	0.0274745	-0.102194	-0.0359029	-0.0320367	-0.086068	-0.0587996	0.0862895	0.105373	0.0958635
At3g22480	-0.0762964	-0.0730381	-0.0746661	0.0102071	-0.104844	-0.0461717	0.0811328	0.161698	0.121978
At3g23050	-0.295621	-0.456485	-0.373812	-0.473464	-0.405716	-0.439192	0.798894	0.830577	0.814822
At3g23150	-0.200246	-0.262931	-0.231248	-0.316102	-0.177704	-0.245244	0.479245	0.476405	0.477826
At3g25290	-0.307202	-0.507735	-0.403987	-0.0164444	-0.221684	-0.115418	0.263001	0.77051	0.538958
At3g27020	-0.167559	-0.0734675	-0.119746	-0.000974867	-0.131552	-0.0647866	0.177348	0.194692	0.186046
At3g43270	-0.303181	-0.572514	-0.431572	-0.466337	-0.346683	-0.40527	0.874026	0.809437	0.842093
At3g45300	0.136987	-0.437991	-0.122045	-0.000738886	-0.398732	-0.186055	0.314807	0.35747	0.336296
At3g46460	0.0433288	-0.235738	-0.0894675	-0.0192556	-0.0448637	-0.0320029	0.0158482	0.233419	0.128731
At3g48690	-0.104301	-0.349799	-0.221834	0.0928125	-0.283076	-0.0829239	0.241098	0.390363	0.31766
At3g50970	-0.262281	-0.481253	-0.367617	-0.296935	-0.176968	-0.235705	0.743415	0.465985	0.611358
At3g51920	0.0563304	-0.215259	-0.0730832	-0.156928	-0.185011	-0.170902	0.0873143	0.403492	0.254047
At3g54030	-0.494691	-0.585061	-0.539168	0.0263044	-0.435153	-0.186053	0.755024	0.72079	0.738008
At3g54190	-0.0429239	-0.144289	-0.0927166	-0.149145	-0.162171	-0.155643	0.218101	0.279606	0.249181
At3g54690	-0.0323119	-0.198582	-0.113053	-0.134321	-0.130517	-0.132418	0.204459	0.289261	0.247483
At3g59220	-0.193307	-0.169005	-0.181105	0.0190137	-0.170613	-0.0726863	0.396549	0.110535	0.260618
At3g59700	-0.140706	-0.250331	-0.194477	-0.0388263	-0.453864	-0.231472	0.249935	0.615484	0.444256
At3g60720	0.109696	-0.584959	-0.19622	-0.0829492	-0.0770727	-0.0800081	0.150338	0.452088	0.309088
At3g63420	0.030609	-0.113357	-0.039579	-0.113357	-0.172436	-0.142594	0.240281	0.126109	0.184324
At4g00740	-0.0347869	-0.0853736	-0.0598585	-0.0784485	-0.111642	-0.0949499	0.0529712	0.254719	0.157369
At4g01850	0.104288	-0.198053	-0.0389765	0.00767061	-0.104278	-0.0472181	0.0168774	0.166213	0.0934765
At4g02890	-0.00897015	-0.151883	-0.078658	-0.0319795	-0.0917043	-0.0615329	0.108932	0.173976	0.14182
At4g03030	-0.120739	-0.102695	-0.111689	-0.00348483	-0.339559	-0.161758	0.218907	0.340193	0.280824
At4g15490	-0.178224	-0.18226	-0.18024	-0.162194	-0.390577	-0.271871	0.666635	0.232778	0.465954
At4g15550	-0.108863	-0.633562	-0.347489	-0.193719	-0.612166	-0.387824	1.01122	0.495941	0.776463
At4g15700	0.103397	-0.875844	-0.304687	-0.210711	-0.450538	-0.325647	0.280275	1.06096	0.722793
At4g27410	-0.214584	-0.573111	-0.382739	-0.357483	-0.474787	-0.414943	0.983719	0.620443	0.813485
At4g31590	-0.170824	-0.301512	-0.234689	-0.222992	-0.0760304	-0.14764	0.30494	0.462748	0.386
At4g36020	-0.17325	-0.154832	-0.164011	-0.03912	-0.109298	-0.0737823	0.26819	0.207795	0.238309
At4g36480	-0.017731	-0.260773	-0.13414	-0.170977	-0.0383814	-0.103156	0.247166	0.236266	0.241727
At4g39100	-0.0620068	-0.0368698	-0.0493835	-0.19179	-0.12335	-0.157164	0.304857	0.106583	0.209124
At5g03160	-0.00191514	-0.061711	-0.0315034	-0.0250193	0.00443729	-0.0102159	0.0444454	0.0395048	0.0419772
At5g03280	-0.100725	-0.169601	-0.134752	-0.3064	-0.468348	-0.385103	0.387462	0.651794	0.525673
At5g06870	-0.193022	-0.59045	-0.378094	-0.0711341	-0.517325	-0.277048	0.762643	0.586956	0.677473
At5g08290	0.00272009	-0.0709789	-0.0336588	-0.0345972	0.00569174	-0.0143125	0.0211365	0.0754501	0.0485489
At5g08560	-0.113926	-0.283479	-0.196213	-0.0649172	-0.062761	-0.0638386	0.306496	0.21646	0.26218
At5g08620	-0.018645	-0.108705	-0.0629723	-0.252774	-0.0755722	-0.161454	0.352803	0.0968321	0.230487
At5g09220	0.0247928	-0.175347	-0.0718091	0.0491473	-0.198846	-0.069527	0.0258605	0.265226	0.150502
At5g09920	0.035854	-0.0978812	-0.0294646	-0.0560306	-0.18541	-0.119271	0.110338	0.190757	0.151108
At5g13170	-0.0966389	-0.851526	-0.425262	0.148474	-1.39209	-0.425262	1.27776	0.733436	1.03112
At5g13570	-0.104735	-0.0574293	-0.0808882	-0.095149	-0.109552	-0.102333	0.240093	0.125878	0.184115
At5g14130	-0.789584	-1.20773	-0.983559	-0.682004	-0.372221	-0.518813	1.26072	1.76084	1.53234
At5g15950	0.0634335	-0.208803	-0.0662729	-0.00596587	-0.0708419	-0.0380394	0.0508703	0.166024	0.109596
At5g38480	0.119466	-0.212417	-0.0369534	-0.185469	-0.139017	-0.162055	0.257274	0.153062	0.206109
At5g39660	-0.11497	-0.259965	-0.185647	-0.0808888	-0.123617	-0.102095	0.337653	0.239916	0.289612
At5g40150	0.0199233	-0.181476	-0.0772647	-0.0924248	-0.0772647	-0.0848249	0.110975	0.21726	0.165096
At5g40190	0.0220505	-0.183007	-0.0768379	-0.140888	-0.0488748	-0.0941481	0.195724	0.151969	0.174012
At5g43450	-0.354283	-0.9841	-0.635092	0.101874	-0.495062	-0.165938	0.996792	0.686041	0.849767
At5g45800	0.0450792	-0.24268	-0.0916376	-0.37936	-0.24268	-0.309401	0.163754	0.637146	0.41978
At5g48580	-0.0283882	-0.0316889	-0.0300371	0.00130537	-0.0303681	-0.0144446	0.0326135	0.0564344	0.0445736
At5g49810	-0.0778352	-0.131456	-0.104397	-0.0774652	-0.0329476	-0.0550347	0.116107	0.202883	0.160147
At5g49890	-0.140966	-0.0336323	-0.0863014	-0.0238662	-0.130448	-0.0761734	0.233027	0.09344	0.164921
At5g51070	-0.0243302	-0.340072	-0.17358	-0.0449639	-0.0950433	-0.0697862	0.0995826	0.393938	0.254255
At5g56090	-0.0927447	-0.0955275	-0.0941356	-0.245057	-0.31792	-0.281029	0.38751	0.363398	0.375505
At5g56140	-0.0216251	-0.0562569	-0.0388371	-0.0689307	-0.0429984	-0.0559064	0.120972	0.0685729	0.0950102
At5g56190	-0.0270186	-0.287562	-0.151417	-0.270862	-0.090724	-0.177983	0.369595	0.300507	0.335465
At5g60820	0.0198695	-0.359099	-0.157207	-0.451021	-0.0817874	-0.254624	0.528266	0.325268	0.430334
At5g63640	-0.159454	-0.184116	-0.171733	-0.156401	-0.162514	-0.159454	0.181904	0.475572	0.336197
At5g64440	-0.194616	-0.167723	-0.181106	0.0233261	-0.175514	-0.0726708	0.170654	0.339895	0.257754
At5g65110	0.0925021	-0.233168	-0.061163	-0.10335	-0.0795732	-0.0914126	0.125754	0.19144	0.158971
At5g66010	-0.131079	-0.143527	-0.13729	-0.0305522	-0.181528	-0.104066	0.0997874	0.381013	0.247242
Expression Pattren 12, 110 orfs
At1g02360	-0.295716	0.171008	-0.0435623	0.111615	0.0681678	0.0900547	-0.413955	0.315805	-0.00341686
At1g03370	-0.159148	0.0133189	-0.0703389	0.0274733	0.169178	0.100065	-0.275962	0.208755	-0.0133411
At1g07750	-0.0972828	0.150227	0.0317732	0.0311681	0.170707	0.102624	-0.275254	0.0110499	-0.125011
At1g09270	-0.132761	0.0717892	-0.0268636	0.0159826	0.177317	0.0989036	-0.335616	0.183867	-0.0526181
At1g09740	-0.182136	0.101449	-0.0333871	0.110953	0.269572	0.192441	-0.363715	0.0480281	-0.143205
At1g11840	0.0284317	-0.00794813	0.0103567	-0.0253899	0.0516136	0.0136249	-0.173228	0.121106	-0.0185673
At1g12310	-0.0526585	0.0726209	0.0113407	0.0693994	0.00677639	0.0384279	-0.158764	0.0587621	-0.0459046
At1g14210	-0.189432	0.112338	-0.0306709	0.0845978	0.124589	0.104732	-0.300787	0.151578	-0.0569456
At1g15110	-0.27289	0.112703	-0.0672492	0.0186019	0.0902195	0.0548554	-0.268041	0.29251	0.03929
At1g15750	-0.0442396	0.00567669	-0.0190654	-0.0192905	0.0513558	0.0164656	-0.0589557	0.0641455	0.00390763
At1g15750	-0.0442396	0.00567669	-0.0190654	-0.0192905	0.0513558	0.0164656	-0.0589557	0.0641455	0.00390763
At1g20110	0.0463084	0.00448788	0.0255498	0.0260247	0.113125	0.0702323	-0.361254	0.15543	-0.0799037
At1g21120	-0.484533	0.401966	0.0257626	0.221736	0.911396	0.60739	-1.11775	-0.0671248	-0.498841
At1g22410	-0.132501	0.145709	0.0132999	-0.046546	0.109755	0.03372	-0.321092	0.221871	-0.0242167
At1g23860	-0.0373943	0.0121372	-0.0124161	-0.000541899	0.0635093	0.0318392	-0.398099	0.329731	0.011235
At1g25390	-0.0370004	0.0899856	0.0278895	0.0444915	0.0245459	0.0345533	-0.199521	0.0722835	-0.0572274
At1g30270	-0.0219177	0.0498515	0.014413	0.0813299	0.309345	0.199838	-0.526649	0.0834042	-0.189615
At1g43800	-0.433609	0.113997	-0.133979	0.100028	0.425383	0.271858	-1.49589	0.954941	0.197274
At1g48960	-0.11645	0.145333	0.0203708	-0.0326339	0.0829795	0.0263308	-0.203444	0.113694	-0.0361788
At1g52050	-0.440027	0.111512	-0.13806	0.0396194	0.224676	0.135113	-0.330492	0.348855	0.0488042
At1g52690	-0.124571	-0.009094	-0.0656776	-0.165213	0.424322	0.15946	-0.575678	0.377929	-0.0214777
At1g52760	-0.117369	0.103495	-0.00271448	-0.0313896	0.055184	0.0125472	-0.202304	0.180688	0.00186316
At1g53580	-0.0327512	0.0225256	-0.00484816	-0.00825898	0.0358361	0.0139569	-0.121082	0.100606	-0.00598399
At1g54030	-0.035663	0.0307137	-0.00209268	0.107328	0.0319688	0.0701405	-0.265085	0.121545	-0.0588563
At1g56600	-0.872781	0.27406	-0.188283	0.529317	0.677416	0.605266	-1.35821	0.489789	-0.156574
At1g61770	-0.137147	0.147155	0.0119958	0.0261397	0.126379	0.0771298	-0.461047	0.263286	-0.0538917
At1g67480	-0.159542	0.201645	0.0323253	0.145707	0.130869	0.138307	-0.458847	0.11382	-0.144284
At1g71010	-0.0801031	0.0676654	-0.00432799	0.0445817	0.107565	0.0764168	-0.451277	0.279551	-0.0400722
At1g74020	-0.18914	-0.0007116	-0.0918519	-0.0988242	0.202207	0.0595287	-0.338361	0.387443	0.0697106
At1g74260	-0.0333591	0.0275454	-0.00258594	0.00927967	0.0316882	0.0205273	-0.150506	0.111159	-0.0137487
At1g77120	-0.630704	0.264807	-0.114553	-0.250699	0.422934	0.125082	-0.667604	0.687332	0.163405
At1g79380	-0.136887	0.126657	0.000894229	-0.0407213	0.173058	0.0701243	-0.300325	0.159418	-0.0522173
At1g79590	-0.0691072	0.0705713	0.00242175	-0.0047165	0.0651273	0.0306281	-0.266606	0.191264	-0.0195824
At2g03690	-0.140944	0.098934	-0.0160252	-0.0134374	0.083545	0.035869	-0.253693	0.209398	-0.00364606
At2g17130	-0.150988	0.108191	-0.0155863	0.0879451	0.16882	0.12895	-0.488885	0.240275	-0.0787214
At2g21520	-0.0611413	0.0635368	0.00254409	0.0351178	-0.0102332	0.0126206	-0.134568	0.103015	-0.0108913
At2g22420	-0.0987957	-0.110111	-0.104442	0.130023	0.136421	0.133226	-0.313071	0.238083	-0.0113328
At2g29500	-0.335969	0.0986306	-0.102366	-0.0348709	0.270174	0.125699	-0.437969	0.385153	0.0315168
At2g30490	-0.081361	0.197225	0.0646465	0.0570171	0.210058	0.135567	-0.466442	0.0616539	-0.178364
At2g34500	-0.0712361	0.127973	0.0318041	0.0645781	0.130667	0.098001	-0.586694	0.288579	-0.083673
At2g39280	-0.0720731	0.15208	0.0443524	0.109224	0.00398143	0.0575622	-0.387849	0.173039	-0.0803172
At2g43535	-0.363839	0.257576	-0.0199294	-0.0687384	0.459878	0.219646	-0.609115	0.244559	-0.120037
At2g45680	-0.0800148	0.157024	0.0433673	-0.103994	0.313057	0.119549	-0.325715	0.0195207	-0.142795
At2g47380	-0.0160023	-0.0394913	-0.0276992	0.0313228	0.0542711	0.0428432	-0.148537	0.114387	-0.0110938
At2g47470	-0.12337	0.115662	0.00109079	-0.126764	0.180827	0.0352142	-0.317953	0.244676	-0.00938341
At2g47930	-0.201392	0.194337	0.00999816	0.0519784	0.268867	0.164495	-0.435623	0.0939897	-0.14665
At3g03050	-0.137367	0.0167468	-0.058253	-0.118721	0.193759	0.0459631	-0.278549	0.298053	0.038368
At3g06810	0.0426635	-0.0374719	0.00315226	-0.0812937	0.200716	0.0665912	-0.164549	0.032731	-0.0625397
At3g07680	-0.007912	-0.00588926	-0.00690015	0.00685088	0.10741	0.058006	-0.146562	0.0434348	-0.0484384
At3g08680	-0.0690512	0.0215874	-0.0230202	-0.00899405	0.0948558	0.0438653	-0.165768	0.121513	-0.0149884
At3g12740	0.00714811	0.0165742	0.0118688	0.0449088	0.0853761	0.065285	-0.317362	0.150657	-0.0644566
At3g13110	-0.0819166	0.225225	0.0798123	-0.13793	0.231343	0.0584891	-0.505562	0.225039	-0.0944994
At3g14100	-0.0855516	0.0498873	-0.0162433	-0.00196012	0.0319697	0.0151049	-0.0734762	0.0767028	0.00356642
At3g15430	-0.233516	0.212919	0.00690148	-0.116966	0.233254	0.0687449	-0.306489	0.178728	-0.043577
At3g17250	-0.0522751	0.127384	0.0403496	0.283035	0.028175	0.161225	-0.733453	0.283035	-0.137477
At3g18990	0.0797596	-0.0826483	0.00083971	-0.10695	0.287932	0.10396	-0.415462	0.204812	-0.0722432
At3g19390	-0.527319	0.253786	-0.0845362	-0.0972754	0.560967	0.269066	-0.626547	0.325339	-0.0734812
At3g24503	-0.154717	0.0866658	-0.0289834	-0.0774587	0.235581	0.0875346	-0.200116	0.0959784	-0.0444854
At3g24570	-0.0515815	0.00967492	-0.0206281	0.0314053	0.0328111	0.0321082	-0.079157	0.0555819	-0.0102149
At3g25070	-0.179943	0.203266	0.0243479	0.046043	0.15131	0.0996362	-0.267068	0.0321337	-0.109725
At3g28540	-0.438761	0.153056	-0.112716	-0.021149	0.159877	0.0722014	-0.673226	0.694051	0.166666
At3g46830	0.151697	0.176709	0.164257	-0.167939	0.302897	0.0866021	-1.03408	0.437864	-0.118004
At3g47420	-0.178643	0.125487	-0.0185783	-0.322532	0.407587	0.0882304	-0.837256	0.647474	0.0882304
At3g47810	-0.10724	0.0466671	-0.0282345	0.0831985	0.0383368	0.0609427	-0.228094	0.157102	-0.0226784
At3g48090	-0.425571	0.164535	-0.100554	0.0763234	0.0469173	0.0616955	-0.443718	0.509889	0.110482
At3g56930	-0.325637	0.318908	0.0323348	-0.0648999	0.479257	0.232683	-0.508966	0.0430412	-0.20672
At3g57390	0.126797	0.0205384	0.0746458	0.14377	0.565122	0.369774	-1.36719	0.340628	-0.274082
At3g59350	-0.27435	0.0942131	-0.0783309	-0.0801467	0.325777	0.137045	-0.373292	0.266998	-0.0179137
At3g63120	-0.187138	0.103003	-0.0347861	0.0116069	0.142454	0.0785133	-0.182488	0.10205	-0.0332154
At3g63220	-0.287308	0.219835	-0.0115669	0.12278	0.250788	0.188203	-0.689231	0.310769	-0.104268
At3g63260	-0.0837705	0.0745724	-0.00242779	-0.0523479	0.137072	0.0454686	-0.291772	0.198888	-0.0256827
At4g02930	-0.0538171	0.0131842	-0.0199273	-0.0240768	0.0606534	0.0189101	-0.0584205	0.0609795	0.00251452
At4g03080	-0.0858817	-0.00817532	-0.0465054	0.0244833	0.102541	0.0640398	-0.128099	0.0916448	-0.0140471
At4g05390	-0.0372152	-0.0504322	-0.043808	0.0478029	0.251357	0.153167	-0.286582	0.0655241	-0.0998135
At4g05530	-0.0345886	-0.0134775	-0.0239947	-0.0483749	0.149369	0.0538824	-0.347456	0.270364	-0.00572369
At4g11420	-0.0506364	-0.0257774	-0.0381533	0.0348467	0.0913638	0.063382	-0.109938	0.058287	-0.0233747
At4g16660	-0.223303	0.102146	-0.0514204	-0.0139171	0.229016	0.112657	-0.249984	0.137868	-0.0430633
At4g16830	-0.140077	0.140851	0.00721375	0.118303	0.0194337	0.0697152	-0.25916	0.107777	-0.0640567
At4g17260	-0.237705	0.239874	0.0207564	-0.171805	0.378294	0.129306	-0.442644	0.18119	-0.0972675
At4g26690	-0.169221	0.14574	-0.0031617	-0.0901568	0.195341	0.0596425	-0.22697	0.127604	-0.0388177
At4g29810	-0.107068	0.0771794	-0.0120049	-0.0241848	0.0676941	0.0224857	-0.141602	0.12154	-0.00403982
At4g29900	-0.141688	-0.0213938	-0.0802875	0.0351896	0.0919342	0.0638409	-0.214305	0.237498	0.029211
At4g31340	-0.0572527	0.185036	0.0689718	-0.0727842	0.229414	0.0862133	-0.528393	0.20462	-0.115824
At4g36990	-0.0636516	0.12708	0.0348644	-0.169391	0.188295	0.0205088	-0.341031	0.230482	-0.0271573
At4g37450	-0.303691	0.0772137	-0.100704	-0.0909009	0.396966	0.173557	-0.249978	0.13961	-0.0420728
At4g38220	-0.015652	0.0542971	0.0197465	0.0374428	0.098437	0.0682627	-0.266689	0.0845572	-0.0804027
At4g38510	-0.0256865	0.0535314	0.0144661	-0.027632	0.129207	0.0529182	-0.225787	0.0888765	-0.0598938
At4g39910	-0.0421243	0.207445	0.0880504	-0.230855	0.245919	0.0271382	-0.533238	0.296919	-0.0592542
At5g07470	-0.0761638	0.121149	0.0258632	-0.00395823	0.0494943	0.0230155	-0.207118	0.108444	-0.0407262
At5g11770	-0.0567257	0.0580576	0.001807	-0.000872824	0.0661428	0.0330246	-0.126985	0.0573995	-0.0318482
At5g11800	-0.262616	0.150113	-0.0415421	0.0703387	0.251772	0.163906	-0.381788	0.144559	-0.0947428
At5g13240	-0.213995	0.0614389	-0.0697147	0.070321	0.0518612	0.0611204	-0.186529	0.203736	0.0217604
At5g13420	-0.101786	0.04652	-0.0257284	0.11007	0.0912979	0.100714	-0.290901	0.133159	-0.0633461
At5g14040	0.0114187	-0.0423629	-0.0152213	-0.00132147	0.087704	0.0438779	-0.0904414	0.0334914	-0.0271451
At5g14800	0.00629706	0.0121889	0.00924582	0.053729	0.059432	0.0565834	-0.213883	0.077342	-0.0609351
At5g16910	-0.114448	0.0780853	-0.0149718	0.0462541	0.0153493	0.0308846	-0.193	0.158447	-0.00660096
At5g17330	-0.240246	0.126841	-0.0450589	-0.11713	0.211617	0.0565875	-0.263012	0.252659	0.0177425
At5g18830	-0.0525485	0.163437	0.0594825	0.158113	0.0123195	0.0870575	-0.445638	0.140675	-0.122899
At5g40540	-0.336168	0.13316	-0.0825022	0.106271	0.21676	0.162573	-0.431453	0.269918	-0.0385592
At5g42180	-0.170483	0.10864	-0.0241812	-0.0568092	0.165436	0.0585887	-0.34334	0.267798	-0.00564983
At5g44070	-0.194829	0.0376044	-0.0739364	0.1086	0.215928	0.163262	-0.432861	0.23615	-0.0599184
At5g47550	-0.226213	0.163901	-0.0180101	-0.108212	0.180929	0.0435905	-0.316065	0.272222	0.00785828
At5g48230	-0.0713381	0.0323297	-0.0185737	0.0556766	0.121522	0.0889751	-0.322467	0.169493	-0.0556177
At5g55120	-0.181876	0.0163778	-0.0793463	-0.0251805	0.145763	0.0628217	-0.183921	0.215687	0.0296748
At5g55500	-0.00211912	-0.0156656	-0.00887638	-0.154872	0.200394	0.0336689	-0.357724	0.298073	0.00712103
At5g57900	-0.210454	0.396734	0.124851	-0.0747486	0.160437	0.0476312	-1.59292	0.960788	0.187686
At5g62670	-0.0562541	0.100281	0.0241354	-0.0229251	0.143829	0.0628598	-0.182905	0.0127452	-0.0817659
At5g64050	-0.374463	0.199113	-0.0593557	-0.0758595	0.271569	0.108288	-0.467572	0.380425	0.0178547
At5g65260	-0.137289	0.0291156	-0.0516893	0.11829	0.103439	0.110884	-0.286931	0.160259	-0.0460778
At5g66040	-0.132662	0.10027	-0.0114992	0.117027	0.0162022	0.0674956	-0.2439	0.131237	-0.0441721
Expression Pattren 13, 108 orfs
At1g01160	-0.232178	0.252264	0.0302817	-0.169772	0.0100232	-0.0770759	-0.019421	0.142218	0.0636607
At1g01380	-0.583127	0.844966	0.300849	-0.457596	0.0784565	-0.164815	-0.506506	0.442868	0.044904
At1g02930	-0.911125	0.459749	-0.0686403	-0.804056	0.458603	-0.0387855	-0.171094	0.727976	0.347372
At1g09560	-0.105639	0.3943	0.165878	-0.424681	0.161197	-0.102203	-0.403888	0.315098	-6.19888e-05
At1g10030	-0.0344927	0.135037	0.0527609	-0.131542	0.0219815	-0.0527394	-0.085881	0.0900896	0.0047858
At1g10130	-0.153558	0.337189	0.112582	-0.315731	0.266136	0.00434065	-0.462075	0.264585	-0.0534697
At1g10630	-0.217917	0.133141	-0.0317364	-0.141544	0.138218	0.00510693	-0.0826397	0.155847	0.0415258
At1g12550	-0.169941	0.151987	-1.54707e-05	-0.0723297	-0.0291621	-0.0505845	-0.0226338	0.13457	0.0581086
At1g20840	-0.31761	0.4626	0.124606	-0.252942	0.311489	0.0567029	-0.364141	0.0954278	-0.116134
At1g21250	-1.01678	0.837372	0.189673	-0.920751	0.323337	-0.168564	-0.698358	1.03767	0.416398
At1g21310	-0.941918	0.525259	-0.0293435	-0.612157	0.474738	0.031313	-0.637179	0.878279	0.311009
At1g21750	-0.152747	0.256148	0.0661389	-0.225733	0.171949	-0.0132325	-0.262886	0.183094	-0.0227311
At1g31580	-0.306752	0.559342	0.190335	-0.451328	0.261243	-0.0514883	-0.486397	0.315488	-0.0304436
At1g49570	-0.588349	0.750199	0.230897	-0.341761	-0.0589532	-0.193438	-0.510538	0.577937	0.134007
At1g62300	-0.344561	0.530284	0.158182	-0.184314	0.156723	-0.00374195	-0.210444	-0.000481341	-0.101647
At1g63120	-0.0280815	0.0363621	0.00449986	-0.0880056	0.108392	0.0135326	-0.0751815	0.0432391	-0.0147567
At1g64710	-0.314215	0.226497	-0.0186737	-0.323418	0.301759	0.022773	-0.0974028	0.163656	0.0390236
At1g66880	-0.562897	0.404153	0.000182258	-0.572235	0.370432	-0.0252403	-0.535241	0.705943	0.214904
At1g67300	-0.266788	0.268762	0.0256962	-0.0780955	0.0522222	-0.0114656	-0.0780955	0.0830421	0.00472207
At1g67800	-0.584562	0.483371	0.046043	-0.295993	0.184	-0.0361256	-0.174686	0.297382	0.0805707
At1g72910	-0.335829	0.820067	0.354913	-0.871653	0.532708	-0.0049404	-0.513225	0.157308	-0.139348
At1g73290	-1.64195	1.18402	0.37435	-2.10138	1.30801	0.437775	-1.93146	1.62654	0.744106
At1g74460	-0.306289	0.2232	-0.0173881	-0.43789	0.568484	0.151324	-0.322202	0.186378	-0.0456164
At1g75710	-0.219679	0.24787	0.0329536	-0.048649	0.0862411	0.0203718	-0.135146	0.0536822	-0.0376445
At1g77510	-0.1483	0.30691	0.0971843	-0.320481	0.349951	0.0533334	-0.363198	0.12383	-0.0992292
At2g01650	-0.23292	0.155283	-0.0258003	-0.286057	0.352711	0.068395	-0.294408	0.255943	0.006853
At2g02050	-0.0758236	0.0951502	0.0121948	-0.145977	0.0930512	-0.0215185	-0.0808504	0.107419	0.0163538
At2g02960	-0.122052	0.181461	0.0376715	-0.0838557	0.0749844	-0.00225078	-0.0623141	0.00474871	-0.0283929
At2g05630	-0.441309	0.231219	-0.0662067	-0.246712	0.218088	0.00432613	0.0651686	0.134947	0.100479
At2g14610	-1.44471	1.38282	0.572956	-1.72021	0.683243	-0.0669938	-1.35451	1.37222	0.57519
At2g14890	-0.0487878	0.0790542	0.0165494	-0.0693585	0.0199779	-0.0239989	0.00716241	0.010546	0.00885518
At2g16910	-1.17097	1.7496	0.928567	-1.86285	0.137154	-0.540918	-0.475823	0.879658	0.355578
At2g17840	-0.140415	0.153234	0.0138675	-0.252526	0.125037	-0.0514282	-0.0577802	0.156614	0.0533963
At2g22010	-0.241142	0.127858	-0.0448769	-0.100786	0.107126	0.00691234	-0.0385631	0.13346	0.0500113
At2g22470	-0.2965	0.383386	0.0831281	-0.372667	0.391917	0.0596945	-0.432553	0.240637	-0.0570434
At2g22570	-0.287722	0.31182	0.0429713	-0.0488675	0.16479	0.0619128	-0.20993	0.0429713	-0.077945
At2g24850	-1.19765	0.541808	-0.0802561	-0.565848	0.705421	0.205505	-0.511571	0.691028	0.211568
At2g28290	-0.125834	0.167479	0.0282637	-0.0348038	0.0106178	-0.0119141	-0.0212954	-0.00126685	-0.0112466
At2g28790	-0.231749	0.225439	0.0148804	-0.331285	0.253332	-0.00956419	-0.229335	0.267762	0.040519
At2g34250	-0.217742	0.249554	0.0347436	-0.245185	0.113192	-0.054897	-0.0935275	0.169751	0.0441097
At2g39940	-0.117978	0.283487	0.0966743	-0.310366	0.115947	-0.0815202	-0.130642	0.13572	0.00867785
At2g40970	-0.380453	0.521462	0.139866	-0.263414	0.182518	-0.0232864	-0.226419	0.102392	-0.0526668
At2g41090	-0.423471	0.489475	0.104043	-0.620308	0.305739	-0.0842244	-0.330068	0.448012	0.110803
At2g46930	-0.270278	0.176059	-0.0299171	-0.0754102	0.0885512	0.00889889	-0.098048	0.162205	0.0379392
At2g47510	-0.155535	0.124127	-0.00893794	-0.0776445	0.0683717	-0.0027896	-0.0108567	0.0456113	0.0176534
At3g02880	-0.209038	0.198275	0.0089452	-0.0722983	0.141844	0.0387418	-0.2442	0.163644	-0.0259135
At3g05250	-0.274029	0.171706	-0.0340151	-0.0494217	0.133232	0.0447937	-0.0231103	0.0281149	0.00272952
At3g05970	-0.363007	0.258913	-0.018791	-0.222496	0.069205	-0.0692857	0.00817649	0.219554	0.117733
At3g07220	-0.0711893	0.0509392	-0.0088333	-0.199039	0.174321	-0.000314607	-0.0459227	0.0810686	0.0189701
At3g09390	-0.292385	0.406233	0.0988051	-0.378442	0.232956	-0.0405954	-0.0655311	0.0470845	-0.00812467
At3g09940	-0.414616	0.280952	-0.0253127	-0.259455	0.389451	0.101178	-0.433419	0.350242	0.0109803
At3g10300	-0.175428	0.169444	0.00728877	-0.467384	0.416858	0.041448	-0.0977151	0.100626	0.0048612
At3g10410	-0.214458	0.30365	0.0677304	-0.193459	0.0255866	-0.079783	-0.00395542	0.064176	0.0305123
At3g11820	-0.277939	0.296855	0.0378963	-0.329216	0.187874	-0.0476268	-0.28316	0.348405	0.0669104
At3g22231	-1.12478	1.61899	0.819734	-1.71746	0.884535	0.104506	-0.794084	0.332249	-0.123683
At3g23190	-0.443313	0.524128	0.120025	-0.690738	0.513801	0.0337536	-0.695523	0.567712	0.070153
At3g24760	-0.179539	0.0748523	-0.0467436	-0.237305	0.271362	0.0393312	-0.17708	0.220028	0.0350945
At3g28180	-0.0775024	0.0589389	-0.00766955	-0.0855561	0.0395469	-0.0216495	-0.00593101	0.0682086	0.0316142
At3g28940	-0.281945	0.157034	-0.0458234	-0.248232	0.172543	-0.0225585	-0.115386	0.285456	0.0989119
At3g46660	-2.78535	1.68714	0.750702	-2.29992	1.1965	0.318986	-0.647847	1.21465	0.565146
At3g47670	-0.203198	0.0974611	-0.0450503	-0.240462	0.174575	-0.0180698	-0.0791341	0.230117	0.0837616
At3g48890	-0.317363	0.348018	0.0533519	-0.384128	0.319935	0.0104337	-0.213668	0.18438	-0.000959396
At3g50650	-0.230093	0.389379	0.11264	-0.262697	0.257635	0.0208013	-0.230093	0.0342843	-0.0918568
At3g51360	-2.46015	0.800378	-0.056427	-1.18713	1.5696	0.768669	-1.09092	1.19329	0.462683
At3g52400	-0.181466	0.456587	0.17255	-0.375358	0.105501	-0.114987	-0.262185	0.207608	-0.00824997
At3g52800	-0.44791	0.218025	-0.0768556	-0.0798358	0.231979	0.0844794	-0.148403	0.188603	0.0299178
At3g52850	-0.0274731	0.0200432	-0.00351922	-0.143657	0.164764	0.0187796	-0.085415	0.0648201	-0.00834243
At3g54810	-0.186171	0.146778	-0.0101129	-0.164441	0.237197	0.05031	-0.191944	0.136679	-0.0182954
At3g54960	-0.222384	0.350481	0.092298	-0.357697	0.256257	-0.0183044	-0.520076	0.404428	0.014997
At3g57260	-1.45413	1.00591	0.246825	-1.49152	0.806105	0.0732186	-0.751113	1.10658	0.458118
At3g58450	-1.07776	1.07111	0.364465	-0.315917	0.548428	0.18004	-0.90088	0.305571	-0.175055
At4g13510	-0.5077	0.402663	0.018127	-0.281475	0.139628	-0.0556135	-0.315648	0.470006	0.130012
At4g14400	-0.940362	0.760384	0.147335	-1.06481	0.892319	0.222924	-0.709478	0.601572	0.0901152
At4g22010	-0.188995	0.114778	-0.0291277	-0.0764338	0.126446	0.0285696	-0.119097	0.131969	0.0118908
At4g24190	-0.0763103	0.128079	0.0295009	-0.10009	0.0892552	-0.00231277	-0.204301	0.151588	-0.0154096
At4g28270	-0.16788	0.254454	0.0586865	-0.208972	0.0177147	-0.0911811	0.00379441	0.0872552	0.0461285
At4g28650	-0.239839	0.350285	0.0851875	-0.146003	0.106698	-0.0141267	-0.259362	0.154692	-0.0375313
At4g31550	-0.288911	0.234929	-0.00334496	-0.395334	0.28317	-0.0165562	-0.139797	0.25486	0.0709844
At4g32530	-0.0727727	0.142967	0.0391258	-0.171639	0.170453	0.00952276	-0.190219	0.106697	-0.0341355
At4g33070	-1.00147	0.553114	-0.0241947	-0.401562	0.315938	0.00134044	0.0753413	0.293146	0.18835
At4g33720	-1.3724	1.05823	0.303706	-1.87449	1.09454	0.267935	-1.11986	1.18852	0.453824
At4g36640	-0.151112	0.257673	0.0677107	-0.123308	0.102795	-0.00583145	-0.173115	0.0710571	-0.0458691
At4g37870	-0.166898	0.0838502	-0.0360829	-0.116564	0.152043	0.0239814	-0.144884	0.178632	0.0259231
At4g40090	-0.565105	0.57231	0.112906	-0.753413	0.282457	-0.144439	-0.572972	0.798392	0.269865
At5g02240	-0.168696	0.14198	-0.00501103	-0.039	0.0793987	0.0214143	-0.0252118	0.00510173	-0.00997586
At5g02790	-0.0863551	0.0762225	-0.00277795	-0.0130528	0.0345489	0.0109445	-0.0690574	0.0551463	-0.00561894
At5g02800	-0.255688	0.35147	0.0795985	-0.135058	0.233926	0.0611983	-0.355524	0.118947	-0.0988702
At5g05890	-0.56751	0.34888	-0.0377457	-0.232643	0.0727017	-0.0719077	-0.0354969	0.352319	0.171403
At5g10430	-0.191396	0.453314	0.166677	-0.432227	0.241635	-0.0563048	-0.293891	0.160863	-0.0486697
At5g10760	-1.08743	1.08135	0.371067	-0.923205	0.56743	0.00663376	-1.21018	0.951679	0.242656
At5g11920	-1.14836	0.67579	0.0346447	-0.75717	0.595683	0.072342	-0.225268	0.542954	0.209384
At5g13720	-0.0655108	0.0826611	0.0104765	-0.105831	0.088067	-0.00562721	-0.0219126	0.0189924	-0.00131517
At5g14420	-0.0331766	0.121689	0.0463331	-0.159934	0.0739792	-0.0382416	-0.0986864	0.0895422	-0.00150463
At5g14950	-0.142117	0.0379981	-0.0492502	-0.200308	0.192973	0.00969214	-0.00732618	0.107243	0.0510954
At5g17820	-0.25828	0.417976	0.119114	-0.606302	0.325593	-0.0663845	-0.511548	0.499226	0.0806063
At5g19980	-0.101865	0.114195	0.010206	-0.269452	0.262972	0.0211828	-0.258033	0.220063	0.000730303
At5g39320	-0.195595	0.110072	-0.0346813	-0.147204	0.0478058	-0.0464067	-0.0346813	0.208606	0.0920849
At5g42050	-0.397209	0.217401	-0.0574201	-0.242464	0.154164	-0.0305627	-0.217627	0.430927	0.142791
At5g42990	-0.231712	0.177989	-0.0123663	-0.301341	0.361344	0.0677213	-0.237812	0.186366	-0.0101896
At5g43060	-0.165676	0.177931	0.0163324	-0.141443	0.161913	0.018193	-0.281858	0.222411	-0.00780222
At5g44610	-0.576267	0.369556	-0.0271957	-0.464344	0.362245	0.00735733	-0.0562861	0.269275	0.115658
At5g48380	-0.408383	0.225534	-0.0568831	-0.0959099	0.193524	0.0560529	-0.233898	0.276316	0.0436475
At5g49980	-0.181481	0.302254	0.0805675	-0.170345	0.0212394	-0.0713752	-0.126643	0.135441	0.0103423
At5g50200	-0.501133	0.39515	0.0155199	-0.378407	0.502065	0.12798	-0.720327	0.525834	0.0333174
At5g60460	-0.215068	0.128057	-0.0333288	-0.0989802	0.0618698	-0.0163148	-0.0205496	0.134996	0.0593188
At5g61510	-0.277693	0.208831	-0.0140188	-0.176929	0.133503	-0.0133798	-0.202925	0.282502	0.0601098
At5g61790	-0.0981119	0.137697	0.024605	-0.180081	0.219476	0.0334856	-0.219836	0.121732	-0.0389669
At5g67500	-0.181859	0.1108	-0.0281213	-0.0230926	0.0610825	0.0196091	-0.104173	0.128763	0.0169913
Expression Pattren 14, 71 orfs
At1g07240	0.00159566	0.060012	0.0310995	0.116155	-0.0416282	0.0394193	-0.257017	0.111428	-0.0610646
At1g07530	0.0153378	-0.0666176	-0.0250579	0.057773	-0.0239512	0.0174893	-0.0757633	0.090845	0.00994481
At1g07810	-0.0224782	0.0126838	-0.00478988	0.0368699	-0.0702129	-0.015678	-0.150696	0.186545	0.0277562
At1g08190	0.0155888	0.0384936	0.0270867	0.221124	-0.11426	0.0631561	-0.255455	0.0814543	-0.077188
At1g13960	-0.0677573	0.176727	0.0596574	0.271161	-0.3623	-0.0110771	-0.368478	0.298717	0.00334962
At1g14830	-0.158863	-0.0722754	-0.11492	0.155908	-0.0884735	0.0388854	-0.125781	0.276298	0.0892208
At1g17130	0.140075	-0.0638733	0.0417018	0.100119	-0.343981	-0.10491	-0.360855	0.474967	0.116757
At1g18710	-0.109323	0.153712	0.0281808	0.443218	-0.315774	0.11307	-0.556782	0.305715	-0.062017
At1g30400	-0.00738912	0.0816011	0.0377917	0.0880994	-0.071126	0.0106821	-0.202758	0.104219	-0.0411201
At1g35190	0.00704543	0.0579931	0.0327441	0.0669758	-0.119712	-0.0233506	-0.248747	0.221563	0.00548855
At1g61620	-0.00706249	-0.0304871	-0.0187274	0.0938806	-0.100876	-0.000214153	-0.0619574	0.102716	0.0227279
At1g63500	-0.000695546	-0.0821126	-0.04083	0.117141	-0.0958532	0.0145709	-0.145	0.196788	0.0359918
At1g76550	-0.0358146	-0.099151	-0.0671352	0.126321	0.0497777	0.0885569	-0.253185	0.199683	-0.00905355
At1g79010	0.0360479	0.028471	0.0322647	0.13216	-0.052001	0.0430155	-0.221774	0.070219	-0.0684032
At2g02040	0.011088	-0.00405682	0.00353538	0.0579272	-0.0224432	0.0183016	-0.254842	0.200038	-0.00954808
At2g14120	0.0202521	-0.0187698	0.000872983	0.0914134	-0.106753	-0.00427018	-0.177032	0.181143	0.013143
At2g16780	0.147518	-0.215052	-0.022407	0.26257	-0.330924	-0.00387139	-0.207963	0.301178	0.0689521
At2g17265	0.0544589	-0.0205886	0.0174229	0.0968106	-0.0813138	0.0104954	-0.0693819	0.0174229	-0.0253265
At2g20790	0.071289	-0.111189	-0.0170671	0.431277	-0.362921	0.0881523	-0.143979	0.0748552	-0.0304166
At2g28670	-0.152424	0.0819569	-0.030479	0.120827	-0.16512	-0.0150738	-0.0970402	0.198866	0.0584865
At2g31390	0.027608	0.0200158	0.0238162	0.0709115	-0.0137862	0.0291844	-0.232612	0.12027	-0.0454081
At2g31980	-0.262864	0.202478	-0.011512	0.28119	-0.125361	0.0921881	-0.626099	0.444005	0.00597551
At2g41220	-0.168924	-0.0117813	-0.0882145	0.100016	0.0103415	0.0558757	-0.322408	0.363911	0.0611838
At3g01410	0.0464978	-0.0422201	0.00282049	0.224368	-0.369496	-0.0422201	-0.0887127	0.20394	0.065022
At3g01460	-0.256327	0.0335854	-0.1041	0.0908002	-0.112149	-0.00710879	-0.384495	0.569701	0.170093
At3g04500	0.0175804	-0.00711171	0.00528749	-1.35104e-05	-0.170824	-0.0828921	-0.158917	0.305178	0.0917123
At3g16950	0.0340577	0.0155893	0.0248529	0.150677	-0.155221	0.00582038	-0.135431	0.0821806	-0.0225262
At3g18035	-0.0494131	-0.0129079	-0.0310453	0.220328	-0.0860037	0.0752774	-0.271525	0.182193	-0.026903
At3g19420	0.0325769	-0.02101	0.00603236	0.160996	-0.0682384	0.0509271	-0.307938	0.18637	-0.0397163
At3g19960	-0.0555777	-0.0335035	-0.0444984	0.200023	0.0187402	0.112227	-0.263741	0.123498	-0.0571675
At3g29810	-0.128779	-0.0777315	-0.10303	0.350522	-0.071843	0.154741	-0.269955	0.17593	-0.0298547
At3g30460	0.0873182	0.0129707	0.0506237	0.060724	-0.365541	-0.136722	-0.497644	0.62087	0.1674
At3g46200	-0.375927	-0.0295756	-0.192383	0.468644	-0.225684	0.162853	-0.249664	0.356633	0.0851028
At3g47580	-0.458231	-0.664682	-0.557766	0.679273	-1.04319	0.0611437	-1.55777	2.21984	1.32138
At3g55740	-0.105554	0.0863977	-0.00638808	0.363932	-0.144928	0.131822	-0.46971	0.225226	-0.0807976
At3g56310	0.0175383	-0.168046	-0.0722711	0.117462	-0.173026	-0.0204828	-0.0773208	0.269602	0.106544
At3g59380	-0.0661878	0.0777341	0.00756703	0.0795118	-0.0730833	0.00523101	-0.101001	0.0786234	-0.00839509
At3g60690	-0.164442	0.159185	0.00642723	0.143244	-0.0632067	0.0437083	-0.304215	0.20598	-0.026681
At4g02080	0.00566302	-0.0125951	-0.00343694	0.121563	-0.121568	0.00511371	-0.13272	0.132179	0.00580035
At4g30100	0.0256254	-0.155657	-0.0621703	0.254846	-0.34457	-0.0139521	-0.169811	0.351453	0.114236
At4g31840	0.0615212	-0.0958728	-0.0150308	0.162416	-0.115911	0.0299541	-0.0866636	0.0672451	-0.0076579
At4g32300	0.0807326	-0.0591976	0.0124634	0.167767	-0.208235	-0.00801918	-0.16447	0.167767	0.0111916
At4g36710	0.0844331	-0.155479	-0.0305418	0.247644	-0.169787	0.0539737	-0.364488	0.317692	0.016553
At4g38250	0.0233801	0.0465305	0.0350015	0.174596	-0.126095	0.0320699	-0.199669	0.0717647	-0.0575783
At4g38740	-0.0190052	0.0439449	0.0128131	0.168492	-0.0264248	0.0743223	-0.434728	0.239294	-0.0587077
At5g02040	-0.0491115	0.0292214	-0.0094134	0.0836323	-0.139714	-0.0237233	-0.0512039	0.122207	0.0381053
At5g02380	-0.0560251	0.00153202	-0.0269599	0.144136	-0.0399776	0.0550141	-0.112999	0.0594687	-0.0241895
At5g05080	-0.00344287	-0.0508767	-0.0269652	0.151084	-0.0907985	0.0352057	-0.073618	0.0630683	-0.00365649
At5g10130	0.0978243	-0.0977819	0.00333378	0.268516	-0.174907	0.0637743	-0.158324	0.0486772	-0.0511139
At5g12120	-0.0662766	-0.0759483	-0.0711046	0.253722	-0.102061	0.0867705	-0.237507	0.209288	0.00311751
At5g12980	-0.111434	-0.129766	-0.120571	0.224994	-0.100546	0.0713867	-0.217229	0.311777	0.0713867
At5g13640	0.0239253	-0.00712638	0.00848288	0.130271	-0.191657	-0.0217319	-0.231846	0.256683	0.0329985
At5g14430	-0.120923	-0.064119	-0.0922414	0.20482	-0.0819794	0.0685352	-0.105093	0.158361	0.0326394
At5g16070	-0.0203517	-0.0553315	-0.0377362	0.125604	-0.112657	0.0113866	-0.0491631	0.107143	0.0311057
At5g20710	-0.0834547	0.366071	0.158746	0.377387	-0.0834547	0.165289	-1.66842	0.761091	0.0067429
At5g23540	-0.143567	0.0531486	-0.0418593	0.0887893	-0.110933	-0.00761859	-0.17777	0.274053	0.0657571
At5g35370	0.183593	-0.0106104	0.0897567	0.292065	-0.325281	0.016164	-0.314976	0.139312	-0.0700238
At5g39510	-0.0675224	0.0266663	-0.0196594	0.13059	-0.137006	0.00298754	-0.0725873	0.113224	0.0233075
At5g39990	-0.126106	0.118958	0.00162384	0.169178	-0.359932	-0.0712555	-0.235771	0.39157	0.111734
At5g42940	-0.0348788	0.0425257	0.0043425	0.164613	-0.242204	-0.0245028	-0.0771442	0.134625	0.0326228
At5g43320	-0.111682	0.0460194	-0.0306775	0.150709	-0.035792	0.0604704	-0.133447	0.0781639	-0.0237652
At5g47820	-0.0609405	0.0127165	-0.0236423	0.0848663	-0.27534	-0.0840242	-0.100405	0.321089	0.125681
At5g54370	-0.129812	0.0414413	-0.0416457	0.0956529	-0.0259763	0.0361198	-0.1909	0.198323	0.0167979
At5g54730	0.026902	-0.186744	-0.0759699	0.168099	-0.148416	0.0185039	-0.175689	0.294714	0.0786002
At5g55600	-0.156454	0.149973	0.0048799	0.16474	-0.0953594	0.040544	-0.323628	0.233589	-0.0182834
At5g60640	-0.156248	0.0243661	-0.0631164	0.0817076	-0.0557044	0.0146376	-0.241213	0.325674	0.0698973
At5g61500	-0.0613012	-0.0209283	-0.0409736	0.0446134	0.00811296	0.0264788	-0.0939917	0.120665	0.017325
At5g61530	-0.067151	-0.0506185	-0.0588612	0.18196	0.0582982	0.121454	-0.315201	0.177839	-0.0477203
At5g62460	-0.098432	0.0113717	-0.0424856	0.177122	-0.133826	0.0300094	-0.074706	0.110225	0.0207211
At5g66280	-0.0630958	-0.134517	-0.0983646	0.26347	-0.0451419	0.117401	-0.697947	0.580038	0.0781572
At5g66690	-0.0321101	0.0574466	0.013363	0.228882	-0.137143	0.0574466	-0.409064	0.258307	-0.0371283
Expression Pattren 15, 74 orfs
At1g03220	-0.164148	-0.173406	-0.16877	0.326698	0.0383714	0.189725	-0.0662963	0.0334085	-0.0155827
At1g06070	-0.188349	-0.344404	-0.264267	0.205484	0.0091229	0.110642	-0.225225	0.508936	0.18806
At1g09250	-0.137255	-0.408417	-0.266475	0.292398	0.0874508	0.193561	-0.00936238	0.166731	0.0813692
At1g11910	-0.0204051	-0.116029	-0.0674251	0.185514	-0.0867122	0.0558125	-0.0982412	0.128114	0.0193717
At1g12000	-0.028823	-0.182773	-0.103746	0.14475	0.0649804	0.105416	-0.216415	0.206262	0.0103473
At1g14280	0.185344	-0.269767	-0.0243389	0.228868	0.0406058	0.137806	-0.284991	0.0783728	-0.0918996
At1g15880	0.00868808	-0.262656	-0.120614	0.224451	-0.072771	0.0834805	-0.00847234	0.100731	0.0471626
At1g20330	-0.0465016	-0.121889	-0.0837025	0.0940681	0.00487953	0.0501628	-0.032473	0.100112	0.0353427
At1g22360	-0.00271273	-0.352735	-0.167135	0.220649	0.272036	0.246571	-0.0679541	-0.076499	-0.0722203
At1g23120	0.358153	-1.04395	-0.178875	0.547249	-0.11106	0.255322	-0.260883	0.354604	0.0794366
At1g26630	-0.0177297	-0.212284	-0.11173	0.248719	-0.0348853	0.113875	-0.0345162	0.043521	0.00502978
At1g29930	-0.0919197	-0.162808	-0.126929	0.310446	-0.0776756	0.129399	-0.0483597	0.0606653	0.00718233
At1g35560	0.0904962	-0.130662	-0.015849	0.209011	-0.0769604	0.0730993	-0.133544	0.0325286	-0.0481194
At1g35580	-0.0320843	-0.142487	-0.0862301	0.119134	0.0580403	0.0889103	-0.220164	0.206181	0.00870053
At1g37130	0.0500505	-0.100906	-0.0234539	0.122112	0.00110987	0.0628784	-0.0629694	-0.0117094	-0.0371124
At1g43700	0.0524916	-0.190419	-0.0638571	0.160899	-0.0387965	0.0645041	-0.0560332	0.0653014	0.00590939
At1g49040	0.0550238	-0.178275	-0.0569147	0.098301	0.149638	0.124198	-0.21028	0.0775224	-0.059214
At1g67740	-0.0176937	-0.235507	-0.122494	0.335387	-0.046591	0.157003	-0.139527	0.0897568	-0.0203345
At2g24500	0.0129922	-0.115082	-0.0496241	0.103277	-0.0605179	0.0237025	-0.0232951	0.0795196	0.0290283
At2g28060	0.020276	-0.354888	-0.155145	0.334523	-0.0822268	0.141145	0.0122742	0.051846	0.032196
At2g28380	-0.0920953	-0.243119	-0.165632	0.198614	0.117	0.158384	0.030491	-0.0127005	0.00905715
At2g29400	-0.088236	-0.17034	-0.128704	0.161691	0.0236119	0.0943025	-0.0418621	0.112274	0.0372633
At2g30860	-0.120739	-0.170802	-0.145553	0.331767	-0.0764471	0.14205	-0.0520187	0.0775313	0.0142102
At2g33590	0.00979646	-0.319857	-0.145635	0.11561	0.1334	0.124533	-0.0552098	0.108433	0.0289305
At2g41060	-0.336435	-0.342875	-0.339652	0.4095	0.306264	0.358805	-0.0782285	0.0403457	-0.0177236
At2g45330	0.00767088	-0.0825272	-0.0367231	0.162372	-0.0729771	0.0494909	-0.060791	0.0419769	-0.00849199
At3g02340	-0.146235	-0.30159	-0.221822	0.231504	0.165616	0.198936	-0.218299	0.254505	0.0373857
At3g03040	-0.0102113	-0.133213	-0.070402	0.0740692	0.0647718	0.0694276	-0.0250252	0.0285646	0.00201861
At3g08580	-0.101981	-0.146911	-0.124271	0.319983	-0.117159	0.117906	-0.101298	0.133084	0.0206474
At3g11900	-0.127956	-0.118268	-0.123104	0.310185	0.0277685	0.175876	-0.168204	0.0686329	-0.0449311
At3g15680	-0.0425945	-0.0726238	-0.057531	0.136308	0.0603589	0.098833	-0.127443	0.0439142	-0.0392214
At3g16640	-0.0299391	-0.0705275	-0.0500903	0.0734458	-0.00683541	0.0338636	-0.00965638	0.0428854	0.0168539
At3g19760	-0.0220694	-0.160157	-0.0894618	0.120653	0.028298	0.075214	-0.00797028	0.0395217	0.0159717
At3g43980	-0.00246726	-0.142431	-0.0707523	0.168095	-0.0419065	0.0669116	-0.0413867	0.0558747	0.00806321
At3g44010	-0.00246726	-0.142431	-0.0707523	0.168095	-0.0419065	0.0669116	-0.0413867	0.0558747	0.00806321
At3g46560	-0.0350699	-0.0682587	-0.0515685	0.0416627	0.0330968	0.0373865	-0.0124096	0.0407472	0.0144134
At3g61470	-0.222799	-0.260189	-0.241373	0.551409	-0.0882048	0.266762	-0.192895	0.1811	0.00618797
At4g00720	-0.13638	-0.0696754	-0.102642	0.194281	0.0237799	0.111548	-0.112744	0.0962816	-0.00444931
At4g11150	0.0147668	-0.0571011	-0.0207194	0.0307504	-0.0175856	0.00678455	-0.00946797	0.0380736	0.0144988
At4g12470	-0.110262	-0.282448	-0.193788	0.647931	-0.192097	0.288212	-0.251378	0.137631	-0.0438014
At4g17830	0.047804	-0.118249	-0.0328348	0.123753	-0.034241	0.0469176	-0.14839	0.12207	-0.00683101
At4g19880	-0.179904	-0.17076	-0.175325	0.137346	0.138349	0.137848	-0.136774	0.205007	0.0442139
At4g22330	-0.0440732	-0.116332	-0.0797502	0.158814	0.101079	0.130236	-0.119704	0.0186175	-0.0488864
At4g23850	0.0285406	-0.27345	-0.114567	0.171737	-0.042223	0.0687199	-0.0798016	0.183304	0.0577402
At4g25520	-0.00948657	-0.215648	-0.108888	0.0817381	0.0993105	0.090551	-0.0988339	0.137233	0.0240227
At4g26100	-0.0336668	-0.229794	-0.1284	0.149004	0.20784	0.178722	-0.254167	0.149004	-0.0385434
At4g26180	-0.425778	-0.971747	-0.673088	1.53414	-0.0610141	0.94664	-0.638323	0.350181	-0.0610141
At4g27080	0.00444222	-0.0691285	-0.0318742	0.0492249	-0.0268002	0.011713	-0.00550556	0.0469618	0.0209665
At4g28750	-0.255613	-0.281136	-0.268318	0.443387	-0.0790796	0.205677	-0.190454	0.331523	0.0940132
At4g30960	-0.148652	-0.0865212	-0.117252	0.199216	0.0191945	0.112011	-0.104541	0.116394	0.0101518
At4g34000	-0.0719825	-0.222592	-0.145323	0.195228	-0.0250813	0.0892743	-0.0323864	0.150768	0.0620955
At4g35800	-0.0263829	-0.103224	-0.0642924	0.13385	-0.000210709	0.0683761	-0.04076	0.0350175	-0.00237364
At4g36890	-0.0506341	-0.109713	-0.0798713	0.148675	0.0385741	0.0946744	-0.109713	0.0798362	-0.0118276
At4g39140	0.00621965	-0.155908	-0.0725681	0.0828407	0.0596955	0.0713146	-0.10054	0.103736	0.00521019
At4g40030	0.0283325	-0.0569794	-0.0136931	0.0963133	-0.0408833	0.0293453	-0.0332749	0.00490072	-0.0140612
At5g02500	-0.0232751	-0.0539815	-0.0385462	0.0922502	-0.0480763	0.0237926	-0.0490004	0.0799316	0.0169052
At5g05010	0.00297218	-0.0991625	-0.047192	0.0674921	0.0234924	0.0456596	-0.0588402	0.0624824	0.00309616
At5g10830	-0.296623	-0.306115	-0.301361	0.371064	0.175225	0.276465	-0.169911	0.215583	0.0356735
At5g11740	0.00491916	-0.0753097	-0.0346373	0.0624839	0.0554019	0.0589467	-0.103776	0.0544606	-0.0224894
At5g15350	0.0663885	-0.142964	-0.0344941	0.0557941	0.0754531	0.065657	-0.112312	0.0535014	-0.027024
At5g18110	-0.0780004	-0.167402	-0.122009	0.166448	0.0319463	0.100763	-0.000330766	0.0457107	0.022874
At5g18210	-0.0120972	-0.275132	-0.137628	0.296656	0.0256578	0.16751	-0.456579	0.373961	0.0176503
At5g18630	0.100387	-0.207677	-0.0454376	0.227155	-0.115622	0.0659234	-0.117061	0.0979078	-0.0055764
At5g19180	-0.0634909	-0.184461	-0.122708	0.11518	0.136166	0.125711	-0.0767098	0.0711827	-0.000869327
At5g20240	0.42585	-1.28197	-0.18886	0.940423	-0.0803352	0.5185	-0.665298	0.380996	-0.0493081
At5g28740	-0.149373	-0.247098	-0.197408	0.564127	-0.190278	0.235684	-0.1986	0.179912	0.00303411
At5g42290	0.0573909	-2.28048	-0.68222	0.898324	0.647628	0.778415	-0.567761	0.844217	0.304484
At5g44080	-0.0189647	-0.542302	-0.257032	0.396972	0.367	0.382064	-0.331033	0.101761	-0.0984668
At5g45890	-0.0238906	-0.496379	-0.240878	0.429621	0.204061	0.321245	-0.425989	0.269156	-0.0369469
At5g56360	-0.0963793	-0.0770602	-0.0866876	0.188257	0.0145488	0.104016	-0.0977693	0.0651083	-0.0140333
At5g60020	0.0956446	-1.47677	-0.486171	0.537212	0.370183	0.456113	-0.377237	0.653045	0.227984
At5g65720	0.0575707	-0.0814898	-0.0102846	0.104635	-0.0519626	0.0284598	-0.0631997	0.0313971	-0.015126
At5g65750	-0.11081	-1.10085	-0.522519	0.700823	0.359785	0.540358	-0.602247	0.608725	0.126734
At5g67320	-0.0213724	-0.198005	-0.106988	0.144791	0.151055	0.147926	-0.15255	0.0713849	-0.0362421
Expression Pattren 16, 171 orfs
At1g01700	0.801332	1.13903	0.980038	1.0749	-0.799572	0.422821	-1.53654	-0.899107	-1.1829
At1g03420	0.333464	0.0118259	0.181589	0.0291556	0.106025	0.0681022	-0.157554	-0.330956	-0.241651
At1g06950	0.244356	0.0918869	0.170134	0.0416598	0.0566897	0.0491938	-0.201073	-0.234939	-0.217907
At1g13110	0.167394	0.603578	0.401909	0.15658	0.134706	0.145685	-0.610633	-0.463846	-0.535373
At1g13640	0.264905	0.209547	0.237492	0.266297	0.069871	0.171424	-0.398756	-0.414281	-0.406498
At1g13710	0.171139	0.288933	0.231238	0.619172	0.17329	0.413389	-0.499202	-0.769795	-0.628164
At1g14720	0.019959	0.190249	0.107615	0.300415	0.0212727	0.167584	-0.211996	-0.326829	-0.26827
At1g15080	0.876083	0.194612	0.575217	0.990254	0.18551	0.643281	-1.26029	-1.05218	-1.15249
At1g15140	0.161196	0.0744957	0.118497	0.19459	0.0425867	0.12059	-0.121998	-0.355793	-0.234165
At1g17190	0.4971	0.295609	0.399869	0.194981	0.275816	0.235964	-0.653953	-0.612374	-0.633014
At1g17220	0.205963	0.0734656	0.141235	0.213815	0.0993511	0.157718	-0.221072	-0.374655	-0.295821
At1g18140	0.324469	0.282783	0.303776	-0.00776868	0.548165	0.296812	-0.595608	-0.569921	-0.582707
At1g18680	0.430497	-0.0927503	0.192466	0.103515	0.713569	0.44055	-0.380646	-0.822484	-0.584716
At1g18880	0.341117	0.252519	0.297498	0.210736	0.0258304	0.121244	-0.505186	-0.32923	-0.414527
At1g22740	0.194656	0.247868	0.221507	0.0864572	0.534815	0.327984	-0.195578	-0.909055	-0.508653
At1g23205	0.428406	0.462513	0.44556	0.283289	0.228841	0.256322	-0.679041	-0.724365	-0.701525
At1g23760	0.271134	0.705344	0.504513	0.196879	0.113222	0.155657	-0.413709	-0.897585	-0.635455
At1g24020	0.22062	0.0533603	0.139413	0.0258287	0.133535	0.0806869	-0.242712	-0.193061	-0.217672
At1g28600	0.158102	0.462729	0.318441	0.138866	0.310296	0.227126	-0.465593	-0.612697	-0.537271
At1g29660	0.301442	0.127812	0.217237	0.419554	0.4138	0.416679	-0.424144	-0.850677	-0.621704
At1g29670	0.190789	0.212281	0.201575	0.187846	0.046104	0.118715	-0.257691	-0.381399	-0.31822
At1g30360	0.188903	0.165469	0.177233	0.147305	0.0402037	0.0947482	-0.255686	-0.286945	-0.271231
At1g33240	0.173439	0.0226812	0.100028	0.210051	0.120748	0.16609	-0.30837	-0.220766	-0.263903
At1g35420	0.10923	0.0760759	0.092748	0.0726026	0.121609	0.0973137	-0.0813986	-0.301106	-0.187074
At1g45474	0.295479	0.158075	0.228412	0.169902	0.0196331	0.0967233	-0.235762	-0.411504	-0.320958
At1g48030	0.0646226	0.0678794	0.0662514	0.110936	0.061793	0.0865733	-0.106308	-0.199564	-0.152183
At1g49430	0.123435	0.0358593	0.0803115	0.00282637	0.150302	0.0784475	-0.15706	-0.15706	-0.15706
At1g53430	0.247051	-0.0187727	0.120253	0.126756	0.152481	0.139676	-0.107582	-0.409297	-0.250566
At1g54000	0.137417	0.119794	0.128632	0.0687987	0.166839	0.118652	-0.273028	-0.220554	-0.246552
At1g54010	0.137417	0.119794	0.128632	0.0687987	0.166839	0.118652	-0.273028	-0.220554	-0.246552
At1g55250	0.519358	0.178676	0.35905	0.263758	0.0665656	0.168528	-0.551564	-0.485975	-0.518397
At1g55260	0.1912	0.344087	0.269668	0.2845	0.163034	0.225045	-0.364917	-0.623978	-0.48864
At1g58160	0.642171	0.931677	0.794174	0.395078	0.227133	0.313548	-0.558128	-1.7204	-1.02525
At1g58290	0.187818	0.227288	0.207688	0.215526	0.212048	0.213787	-0.445761	-0.397145	-0.421248
At1g61660	0.0669744	0.148901	0.108519	0.166991	0.0837361	0.125964	-0.185024	-0.282921	-0.233142
At1g62180	0.212024	0.21098	0.211502	0.12821	0.197598	0.163322	-0.295335	-0.455232	-0.373069
At1g62800	0.496346	0.187412	0.350133	0.279449	0.265762	0.272621	-0.668261	-0.566816	-0.616647
At1g63090	0.119285	0.00150718	0.0615972	0.119285	0.0773024	0.0984463	-0.0534011	-0.267526	-0.156495
At1g66430	0.075512	0.0501538	0.0628892	0.122532	0.109451	0.116007	-0.109315	-0.249517	-0.177713
At1g70760	0.203778	0.0649206	0.136019	0.0698778	-0.00148466	0.0346377	-0.127116	-0.211797	-0.168835
At1g70830	0.23243	0.0787525	0.157637	0.0758476	0.0382118	0.0571527	-0.194831	-0.231936	-0.213264
At1g71695	0.140849	0.196357	0.16887	0.161658	-0.04771	0.0607686	-0.287524	-0.167174	-0.226095
At1g74030	0.112756	-0.00541369	0.0548805	0.00803884	0.0262731	0.0171846	-0.0615575	-0.0809437	-0.0712182
At1g74090	0.257071	0.093672	0.177684	0.430775	0.362161	0.396876	-0.441916	-0.707649	-0.568673
At1g74880	0.197971	0.204027	0.201002	0.0356124	0.0843633	0.0601939	-0.0966026	-0.431993	-0.254574
At1g76790	0.378591	0.335587	0.35725	0.237531	0.161965	0.200242	-0.577158	-0.537046	-0.556962
At1g76990	0.247525	0.351451	0.300423	0.142038	0.0776573	0.110206	-0.42628	-0.393316	-0.409704
At1g77930	0.122079	0.0326272	0.0780464	0.0305749	0.0161276	0.0233694	-0.0561819	-0.146169	-0.100474
At1g79560	0.268213	-0.0117978	0.13499	0.140205	0.044118	0.0929614	-0.196673	-0.24928	-0.222737
At1g79720	0.169637	0.0733547	0.122298	0.274853	0.0660763	0.174238	-0.192379	-0.397009	-0.291069
At2g01530	0.445455	0.395513	0.4207	0.621354	-0.162741	0.281932	-0.636444	-0.698588	-0.667181
At2g05620	0.481098	0.133055	0.317547	0.178492	-0.0792666	0.0553608	-0.225474	-0.503163	-0.357648
At2g13360	0.368209	0.197027	0.285155	0.119975	-0.0741574	0.026172	-0.15913	-0.461046	-0.302205
At2g15620	0.239465	0.0868914	0.165194	0.0825064	0.0601093	0.0713513	-0.121112	-0.352318	-0.232088
At2g15970	0.0999578	0.174428	0.137674	0.147214	0.0103935	0.0804256	-0.069904	-0.368637	-0.211552
At2g18710	0.144847	-0.00768524	0.0705952	-0.0398212	0.297862	0.138878	-0.0754619	-0.331436	-0.197779
At2g19860	0.321518	0.167885	0.246746	0.14009	0.289076	0.216505	-0.370924	-0.552187	-0.45871
At2g19940	0.103075	0.0808379	0.0919987	0.10948	0.0478703	0.079004	-0.0540193	-0.290723	-0.167523
At2g23350	0.144663	-0.00842656	0.0701476	0.128412	0.153093	0.140805	-0.199848	-0.219304	-0.209543
At2g23600	0.179238	0.291159	0.236283	0.237282	0.240557	0.238921	-0.35225	-0.600258	-0.470932
At2g24060	0.200853	0.00168403	0.104703	0.307668	0.146766	0.22946	-0.11276	-0.559477	-0.318897
At2g25810	0.220264	0.214584	0.217427	0.105259	0.144621	0.125074	-0.391879	-0.293499	-0.341851
At2g29330	0.0685063	0.216657	0.144483	0.0897227	0.0426279	0.0663672	-0.152818	-0.266842	-0.208704
At2g29450	0.310902	0.168574	0.241493	0.085894	0.153663	0.120176	-0.185543	-0.542256	-0.352903
At2g29890	0.0346809	0.337106	0.193803	0.229873	-0.0765542	0.0847798	-0.038515	-0.510065	-0.255109
At2g30040	0.505275	0.172489	0.348457	0.0378614	0.312514	0.181714	-0.513626	-0.525255	-0.519429
At2g30590	0.0768763	0.159154	0.118601	0.156015	-0.0210002	0.0702201	-0.162774	-0.210603	-0.18649
At2g31070	0.207182	0.155743	0.181692	0.444297	0.19704	0.325959	-0.566461	-0.44237	-0.503082
At2g32730	0.199638	-0.00154877	0.102549	0.0919886	0.0436549	0.0680242	-0.162336	-0.173875	-0.168094
At2g33810	0.686799	0.846155	0.768676	0.71805	1.42166	1.11233	-1.28195	-2.50434	-1.76738
At2g34680	0.212711	0.0376638	0.12784	0.115298	0.0228957	0.0698365	-0.109528	-0.28304	-0.193677
At2g36400	0.0717179	0.264363	0.171253	0.287898	-0.100921	0.106548	-0.0857194	-0.456088	-0.259051
At2g36830	0.295958	0.0463305	0.176537	0.0644522	0.0481958	0.0563469	-0.217942	-0.240634	-0.229243
At2g37170	0.3468	0.157604	0.255302	0.171761	-0.0161599	0.0808574	-0.390653	-0.274238	-0.331272
At2g37640	0.228329	0.12405	0.177131	0.11336	-0.122854	8.23339e-05	-0.157288	-0.189505	-0.173307
At2g40230	-0.0396218	0.610506	0.321757	0.307791	0.0232659	0.172531	-0.394053	-0.537962	-0.464214
At2g43210	0.0238957	0.0785646	0.0514888	0.0975976	0.0514888	0.0747275	-0.135867	-0.115998	-0.125898
At2g43360	0.010648	0.154361	0.0842936	0.142622	0.123639	0.133162	-0.178618	-0.254196	-0.215912
At2g45470	0.477589	0.0223669	0.267859	0.121225	0.112317	0.116778	-0.315306	-0.430888	-0.37194
At2g48030	0.426795	0.373661	0.400473	0.354876	0.0990088	0.232607	-0.693187	-0.566027	-0.628207
At3g01190	0.951497	0.996338	0.974092	0.349196	0.446737	0.398791	-1.22089	-1.52902	-1.36674
At3g01260	0.508628	1.23115	0.914654	0.494536	0.779529	0.644058	-1.36234	-1.6923	-1.51791
At3g01850	0.181571	0.237624	0.20987	0.0921361	0.106741	0.0994569	-0.28428	-0.334129	-0.308989
At3g02450	0.23514	0.197733	0.216558	0.182673	-0.235931	-0.0114998	-0.206476	-0.183337	-0.19486
At3g02460	0.0843877	0.209438	0.148268	0.179177	0.0114988	0.0977725	-0.159942	-0.32873	-0.241869
At3g03190	0.126852	0.238924	0.183976	0.40554	0.692938	0.556384	-0.366635	-1.13699	-0.700992
At3g06510	0.0371502	0.183773	0.112324	0.108293	0.0679128	0.0882442	-0.112217	-0.288032	-0.197448
At3g07630	0.0648155	0.13394	0.0997915	0.112081	0.00280995	0.0584793	-0.0509778	-0.266309	-0.15463
At3g10520	0.205581	0.194708	0.200155	0.130651	0.244762	0.188835	-0.143072	-0.648043	-0.373576
At3g12260	0.114133	-0.0207606	0.0482615	0.0480908	0.0647458	0.0564422	-0.0721046	-0.135402	-0.103406
At3g14650	0.360845	0.342475	0.351688	0.151432	-0.0427212	0.0576187	-0.179191	-0.647655	-0.394491
At3g15850	0.512527	0.198847	0.364195	0.231749	0.120444	0.177169	-0.36382	-0.713167	-0.527944
At3g16560	0.498689	0.0717281	0.300946	0.296342	-0.0120732	0.15036	-0.312903	-0.561319	-0.43177
At3g20050	-0.00748444	0.144233	0.0703678	0.0590677	-0.00116253	0.0292664	-0.0414619	-0.15548	-0.0973453
At3g21670	0.906888	0.650599	0.784427	0.526456	0.27786	0.407506	-1.18263	-1.18653	-1.18458
At3g29780	1.16043	0.716827	0.955614	0.532403	0.586041	0.559471	-1.26406	-1.7571	-1.48962
At3g30775	0.29907	0.3757	0.337894	0.130416	0.275445	0.204752	-0.473556	-0.6097	-0.540022
At3g43220	0.0670137	0.160509	0.114519	-0.000296116	0.0894451	0.0452724	-0.073164	-0.246206	-0.157092
At3g43720	0.0444334	0.0381401	0.0412901	0.148963	0.151113	0.150039	-0.132573	-0.250887	-0.190518
At3g48560	0.112612	0.131229	0.121951	0.165085	0.0140665	0.0915516	-0.222826	-0.20153	-0.212138
At3g51870	0.614759	0.203745	0.42384	0.282842	0.383094	0.333838	-0.523171	-0.983777	-0.73517
At3g52840	0.491175	0.238344	0.370291	0.410023	-0.0376674	0.203474	-0.321007	-0.809823	-0.54481
At3g55120	0.133186	0.157755	0.145523	0.00364531	0.136853	0.0717858	-0.0918089	-0.34437	-0.212569
At3g55960	0.131694	0.0809125	0.106526	0.0118708	0.0781011	0.0453657	-0.19227	-0.111091	-0.151109
At3g56050	0.00158448	0.183753	0.0955424	0.209845	0.00362009	0.110414	-0.223526	-0.179757	-0.201476
At3g57050	0.123855	0.0418821	0.0834508	0.120787	0.117272	0.119031	-0.0859675	-0.321416	-0.198894
At3g57520	0.3317	0.432308	0.382881	0.00266727	0.402709	0.21651	-0.343769	-0.85015	-0.574855
At3g57530	0.149785	0.548814	0.363052	0.192912	0.0825755	0.138798	-0.627539	-0.360531	-0.487867
At3g58990	0.306122	0.465909	0.388227	0.269785	0.380141	0.326017	-0.67553	-0.748915	-0.711756
At3g60830	0.0476073	0.177283	0.113901	0.180419	-0.022782	0.0823935	-0.186858	-0.199032	-0.192932
At3g61430	0.352201	0.202097	0.2791	0.259337	0.12014	0.191417	-0.457518	-0.478704	-0.468072
At3g62270	0.176072	0.422454	0.304516	0.293111	0.101953	0.200696	-0.14642	-0.883857	-0.468525
At4g11320	0.401741	0.389428	0.395597	0.478151	-0.0925408	0.220842	-0.528843	-0.667749	-0.596625
At4g12060	0.112719	0.134048	0.123423	0.0096763	0.118767	0.0652526	-0.0700032	-0.309222	-0.184661
At4g12510	0.868413	0.912417	0.890582	0.599509	0.616348	0.607953	-1.45034	-1.54702	-1.49787
At4g15920	0.395137	0.0461754	0.231182	0.4952	0.388977	0.443066	-0.545513	-0.791125	-0.663098
At4g15955	0.741761	0.612125	0.678399	-0.058567	0.736114	0.392812	-0.543994	-1.58581	-0.972837
At4g17090	0.295369	0.816129	0.57912	0.0609039	0.599541	0.355216	-0.737188	-1.07352	-0.895574
At4g17300	0.0842502	0.116462	0.100446	0.0782373	0.196361	0.138508	-0.17109	-0.30614	-0.237035
At4g17340	0.207174	0.355317	0.283146	0.22592	-0.00981882	0.11286	-0.458092	-0.325981	-0.390525
At4g18510	0.188974	0.436356	0.317961	0.239958	0.387446	0.315586	-0.195257	-1.10979	-0.581238
At4g24570	0.156082	0.531308	0.35586	0.216836	0.011386	0.117765	-0.553354	-0.374648	-0.461236
At4g27300	0.422936	0.0960886	0.268748	0.422208	0.114225	0.276419	-0.397391	-0.674108	-0.529125
At4g27650	0.0525759	0.0372765	0.0449465	0.0218137	0.0930908	0.0578921	-0.0712959	-0.133995	-0.102305
At4g28400	0.0628406	0.0481664	0.0555221	0.0773665	0.0495068	0.0635039	-0.0517524	-0.187245	-0.117909
At4g30170	0.302508	0.521009	0.415891	0.459831	0.478096	0.468992	-1.11017	-0.665427	-0.870728
At4g30610	0.683188	0.372924	0.536381	0.113914	0.429872	0.280525	-0.904646	-0.708771	-0.803387
At4g31820	0.14753	0.121535	0.134591	0.190675	0.0816421	0.137188	-0.148863	-0.39679	-0.267508
At4g33420	0.0254769	0.129121	0.0782294	0.22859	0.0715465	0.152204	-0.144847	-0.313575	-0.226746
At4g33865	0.118195	-0.0542345	0.0345545	0.0748587	0.0611267	0.0680094	-0.0975952	-0.10408	-0.100834
At4g35060	0.463724	0.350361	0.408156	0.125273	0.0811739	0.103392	-0.443727	-0.578711	-0.509641
At4g35090	0.224759	0.106596	0.166887	0.146129	0.0160347	0.0825477	-0.264993	-0.230378	-0.247582
At4g35470	0.169048	0.172559	0.170804	0.195169	0.274896	0.235583	-0.364985	-0.447447	-0.405627
At4g35740	0.949186	0.333722	0.674028	0.990834	0.388169	0.720745	-1.39709	-1.30782	-1.35177
At4g37010	0.591261	0.286927	0.447105	0.196729	0.582383	0.402404	-0.950112	-0.724044	-0.832654
At4g39350	0.0938246	0.137991	0.116077	0.0977661	0.0486347	0.0734093	-0.104727	-0.275424	-0.187552
At4g39940	0.574025	0.263998	0.427324	0.339561	0.31481	0.327238	-0.681035	-0.81802	-0.747902
At4g39950	0.465628	0.848793	0.669894	0.364229	0.486608	0.426716	-1.08522	-1.08936	-1.08729
At5g01920	0.0982254	0.196073	0.147979	0.267069	-0.00674407	0.136648	-0.0941412	-0.473654	-0.271454
At5g03520	0.139485	0.0326396	0.0870515	0.128199	0.0398856	0.0847179	-0.159244	-0.182105	-0.170629
At5g06710	0.453743	1.74724	1.24085	0.555623	-0.0709187	0.2761	-0.949612	-1.90381	-1.34922
At5g14060	0.148372	0.133729	0.141069	0.39546	0.293347	0.345307	-0.427514	-0.544802	-0.484967
At5g16970	0.126631	0.147212	0.136958	-0.0604971	0.351391	0.160096	-0.115005	-0.466647	-0.280139
At5g17230	0.165719	0.200956	0.183445	0.0687145	0.107444	0.0882085	-0.302736	-0.240479	-0.271272
At5g20960	0.245464	-0.1056	0.0805837	0.106342	0.113449	0.1099	-0.202289	-0.164551	-0.183297
At5g23020	0.186607	0.192863	0.189738	0.2832	0.361243	0.322749	-0.49657	-0.527753	-0.512077
At5g23220	0.520697	0.643429	0.583367	0.197243	0.529818	0.373093	-0.6439	-1.27754	-0.926208
At5g24650	0.0708538	0.0694014	0.0701281	0.0596834	0.109048	0.0845762	-0.125251	-0.184076	-0.154364
At5g25830	0.236499	0.367346	0.303406	0.416534	0.190106	0.307758	-0.209301	-1.04491	-0.567436
At5g25830	0.236499	0.367346	0.303406	0.416534	0.190106	0.307758	-0.209301	-1.04491	-0.567436
At5g28840	0.0702363	0.145294	0.108254	0.0493985	0.0683328	0.0588962	-0.0999268	-0.234731	-0.165754
At5g35210	0.254557	0.221533	0.238139	0.0489427	0.178288	0.115065	-0.157173	-0.556352	-0.343
At5g37020	0.155306	0.185917	0.170692	0.135633	-0.0211473	0.059371	-0.226466	-0.230716	-0.22859
At5g44020	0.47767	0.165064	0.329817	0.382692	-0.0318826	0.190245	-0.611231	-0.400404	-0.501971
At5g44680	0.879005	0.37317	0.648145	0.776907	0.12261	0.486537	-0.930764	-1.26665	-1.08896
At5g44720	0.0796076	0.0227267	0.0514476	0.103838	0.040301	0.0724188	-0.138453	-0.108492	-0.123394
At5g45950	0.159314	0.0888594	0.124517	0.219037	0.130485	0.175441	-0.344917	-0.253995	-0.29874
At5g46890	0.714612	0.672049	0.693487	0.269639	0.361046	0.316066	-1.11795	-0.902655	-1.00629
At5g47450	0.37057	0.743699	0.569164	0.368865	0.691475	0.539169	-0.867808	-1.33328	-1.08185
At5g47720	0.100289	0.14164	0.121113	0.425497	0.0330882	0.242593	-0.426582	-0.284071	-0.353568
At5g48930	0.125784	0.0944939	0.110224	0.0382347	0.0478468	0.0430479	-0.152645	-0.153775	-0.153211
At5g52440	0.137931	0.336579	0.240671	0.138613	0.0974352	0.118171	-0.400684	-0.312696	-0.35602
At5g54390	0.168934	0.0784032	0.124379	0.207136	0.16945	0.188416	-0.335719	-0.288886	-0.312112
At5g56540	0.592434	0.264352	0.4377	0.388076	0.0475744	0.227847	-0.658567	-0.646764	-0.652653
At5g60660	0.585932	0.781748	0.68716	0.576068	0.100669	0.357862	-0.965026	-1.09558	-1.02883
At5g61170	0.115746	0.0116304	0.064627	0.0319713	-0.00765673	0.0122932	-0.0658433	-0.0865885	-0.0761792
At5g62890	0.104542	0.11281	0.108682	0.0243394	0.0962273	0.0607306	-0.117034	-0.221821	-0.168476
At5g63600	0.417964	0.242284	0.332797	0.285734	0.0929695	0.192569	-0.407693	-0.638252	-0.518372
At5g64290	0.0537051	0.152113	0.103748	0.0201014	0.0319203	0.0260228	-0.0593453	-0.200208	-0.128058
At5g64300	0.17764	0.0678523	0.12379	0.221388	0.0731147	0.149156	-0.282513	-0.259478	-0.27095
At5g64940	0.153701	0.19292	0.173444	0.427986	0.0905976	0.269132	-0.46663	-0.405441	-0.435711
Expression Pattren 17, 129 orfs
At1g01040	-0.121701	-0.172167	-0.146713	0.284291	-0.153611	0.0818914	0.0799325	0.0720704	0.0760067
At1g02840	-0.124818	-0.0794715	-0.101967	0.188161	0.00582229	0.0998708	-0.0507077	0.0582896	0.00481998
At1g06630	-0.0815827	-0.287612	-0.180923	0.328647	-0.137508	0.114316	0.0643738	0.0986665	0.081622
At1g06900	-0.0956086	-0.0254234	-0.0600894	0.149477	-0.042652	0.0566084	-0.0189136	0.030564	0.00603739
At1g07920	-0.292239	-0.316712	-0.304424	0.499155	-0.0500427	0.250533	-0.0216318	0.162169	0.073193
At1g07930	-0.292239	-0.316712	-0.304424	0.499155	-0.0500427	0.250533	-0.0216318	0.162169	0.073193
At1g08380	-0.16418	-0.175225	-0.169692	0.338585	-0.0503002	0.157206	-0.0258413	0.067739	0.021708
At1g09570	-0.397837	-0.200526	-0.295811	0.150126	-0.0860004	0.0368882	0.0638199	0.456093	0.273248
At1g13440	-0.173287	-0.201242	-0.187196	0.322568	-0.0549986	0.146101	0.0590236	0.0396574	0.0493734
At1g14920	-0.268761	-0.206851	-0.237474	0.456948	-0.10516	0.203098	-0.144848	0.241709	0.0613386
At1g15340	-0.304494	-0.0952811	-0.196099	0.239403	-0.113331	0.0737896	0.225109	0.0368543	0.13405
At1g17110	-0.253715	-0.0946959	-0.172016	0.286532	-0.0315679	0.136231	-0.00678142	0.0923688	0.0436451
At1g20340	-0.172999	-0.0713851	-0.121298	0.195293	-0.124917	0.0440534	0.00310834	0.162918	0.0852254
At1g20620	-0.155015	-0.13816	-0.146563	0.255092	-0.0676654	0.102721	0.0665881	0.0330741	0.0499284
At1g20760	-0.191419	-0.168226	-0.179776	0.25659	0.0193349	0.142834	-0.0562929	0.134629	0.0423242
At1g20880	-0.177487	-0.163273	-0.170362	0.0631547	0.0910917	0.0771909	-0.0675139	0.248224	0.0989752
At1g25490	-0.10914	-0.0717137	-0.0903055	0.0361164	0.0399597	0.038039	-0.0133478	0.117061	0.0533302
At1g25500	-0.747505	-0.505617	-0.621498	0.693067	0.00313531	0.388957	0.205952	0.319609	0.263899
At1g26960	-0.192771	-0.290531	-0.240823	0.249372	-0.0552675	0.105078	0.260315	0.0196374	0.144989
At1g27340	-0.170027	-0.109926	-0.139663	0.190694	-0.0725028	0.065089	0.137896	0.0188434	0.0795973
At1g30380	-0.346973	-0.159625	-0.25026	0.475799	-0.0797368	0.224607	-0.16602	0.246993	0.0552157
At1g36730	-0.202544	-0.104732	-0.152809	0.0694344	0.0895049	0.0795042	-0.0807865	0.22322	0.0792095
At1g43690	-0.0579392	-0.108609	-0.0830518	0.110366	-0.0326602	0.0406245	0.00967153	0.0775755	0.0440229
At1g52830	-0.861631	-0.533096	-0.688032	0.594787	0.507755	0.551928	0.180324	0.104872	0.143091
At1g53850	-0.0972728	-0.112576	-0.104904	0.0877954	-0.0078925	0.0407449	-0.0556888	0.181837	0.067957
At1g54210	-0.674535	-0.409563	-0.535975	0.51082	0.0294802	0.290132	0.0294802	0.485011	0.27515
At1g55920	-0.384235	-0.327633	-0.355657	0.278855	-0.0342851	0.130763	0.306673	0.153432	0.232087
At1g62740	-0.167439	-0.0807905	-0.123464	0.0511909	0.0422392	0.0467219	0.0168748	0.136658	0.0780091
At1g63110	-0.297318	-0.000117302	-0.141078	0.204944	-0.0199862	0.096858	-0.0412607	0.14375	0.0542088
At1g64280	-0.230749	0.0201986	-0.0998257	0.159456	-0.038925	0.0636732	0.0284507	0.0556209	0.0420997
At1g66510	-0.214303	-0.117342	-0.165008	0.288651	-0.183769	0.0716925	-0.124573	0.326265	0.118386
At1g67030	-0.125799	-0.17981	-0.152552	0.272097	-0.144857	0.0786309	0.152303	0.0147991	0.0851884
At1g67090	-0.882865	-0.659101	-0.766649	0.769179	0.128469	0.484103	-0.0265508	0.620478	0.332937
At1g69330	-0.415555	-0.0690599	-0.23193	0.385506	-0.274786	0.0928102	0.238337	0.10261	0.172069
At1g71340	-0.277266	-0.047987	-0.158076	0.102838	-0.00163131	0.0515484	0.160033	0.0597691	0.110772
At2g01270	-0.0779845	-0.102779	-0.0903289	0.133834	-0.0749151	0.0332316	0.0526584	0.066625	0.0596588
At2g05070	-0.388269	-0.185222	-0.283176	0.380866	-0.00454002	0.200995	-0.0033155	0.187446	0.0952162
At2g17870	-0.128628	-0.0662187	-0.0970858	0.163346	-0.0690492	0.0518228	0.068145	0.0289747	0.0486929
At2g21390	-0.0968696	-0.104004	-0.100432	0.0738467	-0.0528136	0.0119056	0.0891208	0.0897902	0.0894555
At2g21950	-0.111505	-0.310355	-0.207507	0.383326	-0.185614	0.126722	0.0613982	0.141519	0.102015
At2g23930	-0.0922356	-0.0348597	-0.063262	0.0986929	-0.00326443	0.0486145	-0.013833	0.0445127	0.0156345
At2g26230	-0.168885	-0.0654517	-0.116242	0.179189	-0.0445896	0.0716342	-0.121694	0.211524	0.0545143
At2g27330	-0.300948	-0.208323	-0.253892	0.297738	0.0687865	0.187799	0.165518	-0.0284644	0.0717849
At2g27580	-0.312256	-0.305088	-0.308667	0.249159	-0.155768	0.0608558	0.339984	0.172914	0.258866
At2g29560	-0.192317	-0.154377	-0.173222	0.313891	-0.0390087	0.148205	-0.00293928	0.0672078	0.0325603
At2g34420	-0.325228	-0.127551	-0.223006	0.392271	-0.0155687	0.202715	-0.117732	0.17697	0.0371304
At2g34430	-0.325228	-0.127551	-0.223006	0.392271	-0.0155687	0.202715	-0.117732	0.17697	0.0371304
At2g37410	-0.315572	-0.208216	-0.260896	0.134106	0.183537	0.159033	0.00668483	0.196573	0.10475
At2g39730	-0.502482	-0.208814	-0.348189	0.493133	-0.04857	0.247558	-0.120528	0.352565	0.135325
At2g40730	-0.162186	-0.15148	-0.156823	0.113332	0.146247	0.129883	-0.02395	0.077375	0.0276018
At2g42680	-0.0567731	-0.111737	-0.0839929	0.0746432	-0.0204047	0.0279018	-0.00331963	0.116072	0.0576106
At2g43020	-0.228128	-0.208987	-0.218526	0.228455	0.041315	0.137917	0.210796	-0.0493985	0.0865569
At2g46590	-0.416079	-0.0913159	-0.244578	0.317097	-0.0141088	0.160978	0.119158	0.0727223	0.0961269
At2g47070	-0.266488	-0.106942	-0.18451	0.246921	0.0251329	0.140285	0.0754669	0.0214317	0.048702
At2g47170	-0.0631982	-0.0107919	-0.0367576	0.0714711	-0.0287477	0.022232	-0.0272056	0.0573214	0.0156764
At2g47600	-0.0748428	-0.0831784	-0.0790047	0.109914	-0.0327171	0.0403606	0.0878078	-0.00870027	0.0403606
At3g01700	-1.51603	-1.1941	-1.34611	1.12782	0.805897	0.975822	0.571431	0.184408	0.390859
At3g03070	-0.164831	-0.0164653	-0.0887424	0.0891141	0.0358056	0.0627059	-0.0842401	0.136373	0.03028
At3g04120	-0.0641405	-0.0766241	-0.070369	0.0651892	-0.0260336	0.0202987	0.0772484	0.0237062	0.0507248
At3g04910	-0.280608	-0.145054	-0.211239	0.323025	-0.144332	0.108189	-0.00991827	0.239671	0.120267
At3g07200	-0.233182	-0.300296	-0.266349	0.350687	0.0542363	0.210063	0.114741	0.00782622	0.0622739
At3g07810	-0.206668	-0.157862	-0.182059	0.0675266	0.0494554	0.0585191	0.0802977	0.166663	0.124127
At3g09260	-0.186144	-0.195435	-0.190782	0.327713	-0.0988763	0.130129	0.123116	0.0185162	0.0717637
At3g12360	-0.356347	-0.226806	-0.290123	0.3956	-0.2518	0.107914	-0.00993045	0.413963	0.217529
At3g13520	-0.182591	-0.0901019	-0.135605	0.150915	-0.044007	0.056743	-0.0349232	0.194972	0.0845989
At3g15540	-1.40542	-0.706651	-1.01414	0.474006	0.501511	0.487824	0.376122	0.725423	0.561319
At3g16630	-0.255292	-0.0669247	-0.158036	0.197775	-0.121936	0.0467576	0.0605487	0.177105	0.120004
At3g16740	-0.290797	-0.0519735	-0.166449	0.136736	-0.0226795	0.0592292	0.178324	0.0445999	0.113011
At3g17810	-0.138899	-0.254949	-0.195757	0.184503	-0.0605087	0.0671921	0.0496263	0.214418	0.134374
At3g19950	-0.0967198	-0.0572529	-0.0768514	0.120437	-0.0494876	0.0379753	-0.0539198	0.133166	0.0426535
At3g20770	-0.184124	-0.142256	-0.163039	0.202406	-0.0446409	0.0841643	-0.0548251	0.215601	0.0867144
At3g23030	-0.29778	-0.250417	-0.273904	0.121208	0.089348	0.105366	0.20823	0.128858	0.16909
At3g23280	-0.211404	-0.000600921	-0.102156	0.115081	-0.0504848	0.0346717	0.0377892	0.10521	0.0718936
At3g26650	-0.189168	-0.288607	-0.238031	0.345008	-0.0759343	0.149836	-0.0304679	0.224645	0.10272
At3g26690	-0.858089	-0.334156	-0.572468	0.451838	-0.132264	0.189148	0.399243	0.437999	0.418751
At3g28730	-0.13243	-0.188548	-0.160216	0.227315	-0.0937889	0.0756781	0.0752198	0.106052	0.0907185
At3g45870	-1.58281	-0.432254	-0.895753	0.554689	-0.118146	0.257145	0.756323	0.721697	0.739114
At3g46510	-0.23352	-0.228614	-0.231065	0.282176	-0.00242874	0.146881	-0.0102255	0.185723	0.0910738
At3g51600	-0.0886494	-0.0768162	-0.0827204	0.101399	-0.0342862	0.0351508	-0.0355279	0.131205	0.0502456
At3g51670	-0.169451	-0.292011	-0.22943	0.232161	-0.129462	0.0626502	0.0640234	0.283557	0.177962
At3g52560	-0.235282	-0.0849337	-0.15815	0.0644289	0.0753026	0.0698762	-0.0170292	0.19364	0.0921474
At3g55440	-0.0968777	-0.0994307	-0.0981537	0.190194	-0.0182234	0.0897458	-0.0165745	0.0382312	0.0110887
At3g57870	-0.067482	-0.0990744	-0.0831919	0.0976868	0.0146103	0.0567465	0.0393467	0.0144205	0.0269375
At3g58730	-0.0834789	-0.00775719	-0.0451212	0.034049	-0.00993824	0.0122232	0.0176697	0.0489559	0.0333977
At3g62820	-0.32435	-0.476353	-0.39835	0.60481	-0.0916892	0.29819	-0.0613156	0.311791	0.137266
At4g01960	-0.206037	-0.230734	-0.218333	0.227754	0.106474	0.168388	-0.0791464	0.17702	0.054615
At4g08590	-0.501238	-0.388764	-0.443905	0.580863	0.0923632	0.357191	-0.0335589	0.231823	0.105225
At4g09600	-3.50274	-1.00024	-1.76577	1.33856	-0.839775	0.626543	0.866493	2.428	1.84894
At4g10340	-0.353842	-0.200826	-0.275306	0.481145	-0.016984	0.253473	-0.0958691	0.166782	0.0414257
At4g18360	-0.450988	-0.192206	-0.315802	0.27254	-0.176323	0.0654952	-0.0335635	0.545824	0.285022
At4g20410	-0.115389	-0.195205	-0.154745	0.157552	-0.100833	0.0341367	0.179734	0.0692162	0.125533
At4g27780	-0.246308	-0.195407	-0.220633	0.0644179	0.19929	0.13343	-0.0284776	0.202213	0.0914742
At4g34460	-0.160277	-0.0633248	-0.110987	0.0457107	0.0500085	0.0478613	0.0585653	0.0687672	0.0636751
At4g34540	-0.445055	-0.283304	-0.361914	0.456937	-0.0703104	0.217266	0.152082	0.172148	0.16215
At4g35790	-0.173174	-0.12456	-0.148663	0.0649251	0.0121611	0.0387839	0.0817822	0.138384	0.110361
At4g35830	-0.131606	-0.116621	-0.124094	0.0599898	0.0490064	0.0545081	0.117726	0.0209445	0.0701465
At5g01530	-0.228016	-0.153254	-0.190151	0.428427	-0.111025	0.18377	-0.0267216	0.0729802	0.02399
At5g03840	-0.846587	-0.550455	-0.690936	0.663413	0.0688004	0.396527	0.556991	0.0688004	0.333448
At5g09810	-0.172172	-0.0748417	-0.122686	0.096009	2.26763e-05	0.0488136	0.0713499	0.0785501	0.0749538
At5g10270	-0.765176	0.0453459	-0.303728	0.270447	-0.158188	0.0719907	0.302568	0.25685	0.27989
At5g10300	-0.22469	-0.130532	-0.176843	0.0851088	0.0905123	0.0878134	0.0242968	0.153822	0.0905123
At5g17020	-0.157204	-0.178183	-0.167655	0.0895853	-0.024149	0.0338382	0.0104947	0.255228	0.138044
At5g17380	-0.149056	-0.167972	-0.158483	0.210209	-0.0523524	0.0848938	-2.71267e-05	0.153834	0.0789533
At5g17420	-0.19691	-0.346104	-0.269579	0.500021	-0.264265	0.167908	0.00582377	0.262982	0.140125
At5g20290	-0.115945	-0.25734	-0.184911	0.261729	-0.108195	0.0885909	0.0438264	0.166026	0.10622
At5g22400	-0.47332	-0.0943699	-0.271438	0.497882	-0.143431	0.212571	-0.0943699	0.2682	0.0982752
At5g25940	-0.209072	-0.0863435	-0.146403	0.153498	-0.0395267	0.0602114	0.120351	0.0578473	0.0894377
At5g27650	-0.333695	-0.321177	-0.327423	0.281335	0.0358428	0.163804	0.264824	0.0671286	0.16936
At5g38410	-0.882865	-0.659101	-0.766649	0.769179	0.128469	0.484103	-0.0265508	0.620478	0.332937
At5g38430	-0.882865	-0.659101	-0.766649	0.769179	0.128469	0.484103	-0.0265508	0.620478	0.332937
At5g38850	-0.31336	-0.416454	-0.363987	0.192063	0.0250558	0.110975	0.00524754	0.491624	0.268835
At5g42300	-0.161199	-0.0678233	-0.113756	0.162762	0.012621	0.0896436	-0.0690535	0.118851	0.0279552
At5g45050	-0.348008	-0.210504	-0.277618	0.415404	-0.00602187	0.220025	-0.00602187	0.142563	0.0701824
At5g46180	-0.289417	-0.222703	-0.255675	0.374823	-0.0635675	0.172216	0.0625907	0.126721	0.0950123
At5g46210	-0.137047	-0.060743	-0.0983912	0.179216	-0.0806357	0.0551322	0.0798791	0.0148567	0.0477336
At5g47030	-0.135098	0.00679779	-0.0624065	0.079648	-0.0119143	0.0345936	0.00882244	0.0499992	0.0295582
At5g51430	-0.162541	-0.020578	-0.0898142	0.185765	-0.0599714	0.0681223	0.0443263	0.00827689	0.0264143
At5g52280	-0.279607	-0.148759	-0.2127	0.286977	0.0411029	0.169272	0.0937448	0.00157457	0.0483957
At5g57580	-0.524297	-0.264551	-0.388586	0.46802	-0.102163	0.210915	0.278986	0.119996	0.20168
At5g58060	-0.167425	-0.119638	-0.143334	0.0995103	0.0272428	0.0638295	0.0186521	0.14037	0.0807935
At5g58290	-0.127369	-0.02635	-0.0759754	0.0386057	0.0312004	0.0349073	0.0394487	0.0438709	0.0416613
At5g58520	-0.718546	-0.77744	-0.747692	1.16116	-0.233119	0.626282	-0.192477	0.614878	0.266954
At5g60390	-0.292239	-0.316712	-0.304424	0.499155	-0.0500427	0.250533	-0.0216318	0.162169	0.073193
At5g61230	-0.177818	-0.229885	-0.203617	0.173122	0.0297469	0.103215	0.134836	0.0684002	0.102001
At5g61640	-0.258016	-0.143638	-0.199694	0.11352	-0.0417586	0.0379685	0.0686654	0.257033	0.165921
At5g63840	-0.171468	-0.102745	-0.136697	0.0819222	0.00485007	0.0439011	-0.0166076	0.200707	0.0961377
At5g65310	-0.289635	-0.268114	-0.278834	0.151026	0.182628	0.166914	-0.0300788	0.249578	0.116515
At5g66510	-0.171403	-0.00281493	-0.0846478	0.109561	-0.0158278	0.0482286	-0.0255219	0.102511	0.0399144
AtCg00470	-0.13164	-0.271106	-0.199688	0.295024	-0.151845	0.088823	0.141719	0.105158	0.123555
Expression Pattern 18, 78 orfs
At1g03870	0.0409382	0.12133	0.0816944	0.0655029	0.280977	0.177259	-0.310723	-0.201763	-0.255215
At1g04040	-0.0193374	0.122472	0.0533087	0.221346	0.213632	0.217494	-0.261184	-0.278109	-0.269622
At1g07890	0.0142383	0.0871514	0.051155	0.0338744	0.0393781	0.0366296	-0.0930759	-0.0818826	-0.0874682
At1g08930	0.0305102	0.133146	0.08274	-0.108212	0.204104	0.0563805	-0.0755356	-0.191013	-0.132119
At1g10200	-0.0455671	0.248211	0.108787	0.0250802	-0.00241333	0.0113987	-0.148728	-0.0818611	-0.114908
At1g10570	-0.225498	0.419314	0.132637	0.0658191	0.0852278	0.0755561	-0.163101	-0.205708	-0.184247
At1g12110	-0.0803398	0.342383	0.14645	0.0106904	0.333908	0.181332	-0.507748	-0.123696	-0.30298
At1g15500	-0.0103758	0.148889	0.0714528	0.101054	0.165796	0.133788	-0.187281	-0.219849	-0.203473
At1g17420	-0.50828	1.03014	0.456954	0.591256	0.982046	0.799842	-0.578669	-1.73067	-1.04262
At1g18470	-0.118404	0.385901	0.155673	0.236567	0.0519001	0.147186	-0.414558	-0.16168	-0.282585
At1g20380	-0.103904	0.215141	0.0644203	0.25161	0.582065	0.426278	-0.51415	-0.443214	-0.478246
At1g21110	-0.096601	0.798003	0.41896	0.139839	1.01213	0.640929	-1.34559	-0.626175	-0.941496
At1g26150	0.0433891	0.161129	0.10346	-0.0503747	0.227421	0.0951994	-0.0582511	-0.332916	-0.189057
At1g29340	0.0231361	0.349223	0.195373	-0.150512	0.2578	0.0680408	-0.23574	-0.259666	-0.247654
At1g30530	-0.194868	0.407326	0.137424	-0.0730342	0.227853	0.0852395	-0.306979	-0.0890545	-0.193906
At1g57990	-0.136872	0.529018	0.234156	0.060225	0.303625	0.187052	-0.483629	-0.303056	-0.390519
At1g60960	2.75506e-06	0.312898	0.164916	-0.0177232	0.265645	0.130906	-0.22631	-0.345609	-0.284727
At1g61100	0.0663003	0.0262784	0.0464282	-0.0518933	0.243443	0.10332	-0.210218	-0.0800124	-0.143647
At1g67470	-0.165446	0.582865	0.256692	-0.0646456	0.448747	0.214768	-0.506483	-0.3437	-0.422797
At1g73080	-0.17868	0.293477	0.0766286	0.132032	0.287913	0.212077	-0.307542	-0.241673	-0.274232
At1g77920	0.122757	0.403647	0.270027	0.0716563	0.225341	0.150544	-0.547363	-0.285896	-0.410714
At1g78020	0.217593	0.81163	0.544972	0.10653	0.553652	0.347344	-0.903618	-0.817953	-0.86015
At1g78700	-0.0448433	0.265577	0.1187	0.00895823	0.0723576	0.041006	0.00173844	-0.315373	-0.148121
At1g80830	0.00495587	0.159398	0.0842424	0.220733	0.238636	0.229712	-0.40921	-0.218018	-0.310449
At2g19070	-0.304173	0.719674	0.296731	0.570296	0.403647	0.489376	-0.889135	-0.567207	-0.71921
At2g20360	-0.0720302	0.0780953	0.00498475	0.040738	0.0395326	0.0401353	-0.0717689	-0.0160476	-0.0436393
At2g20570	0.0269473	0.2572	0.146663	0.0314625	0.110414	0.0714782	-0.211514	-0.217931	-0.214719
At2g22300	-0.0413014	0.183704	0.0755833	0.00375832	0.207012	0.108961	-0.124194	-0.234993	-0.17853
At2g23810	0.0323767	0.569055	0.325529	0.00470204	0.335576	0.179604	-0.667244	-0.304883	-0.474716
At2g24860	-0.0929892	0.215314	0.0693825	-0.0241668	0.258574	0.124119	-0.196655	-0.170208	-0.183371
At2g25930	0.0240463	0.267225	0.150753	-0.0141007	0.205726	0.099995	-0.2885	-0.201038	-0.244106
At2g26710	-0.483638	0.432633	0.0460483	0.297156	0.825312	0.58527	-0.855466	-0.297587	-0.549727
At2g27230	0.0485741	0.154615	0.102569	-0.0122951	0.188299	0.0914851	-0.252869	-0.130165	-0.190213
At2g35920	-0.274378	0.379219	0.0891215	-0.0400804	0.25948	0.117461	-0.28783	-0.0688203	-0.174173
At2g37040	-0.0522051	0.176129	0.0664749	0.180443	0.158744	0.169635	-0.186586	-0.280066	-0.232569
At2g38400	-0.387866	0.413672	0.0678667	0.0398158	0.34197	0.198789	-0.233832	-0.215685	-0.22473
At2g40290	-0.0566308	0.100256	0.0239442	0.0944236	0.060305	0.0774654	-0.145686	-0.0546357	-0.0994422
At2g41940	-0.040924	0.101294	0.0319362	0.0121489	0.396465	0.217066	-0.10819	-0.37456	-0.235236
At2g44520	0.0260752	0.177756	0.103908	-0.171485	0.313238	0.0911387	-0.235672	-0.125451	-0.179509
At2g45670	-0.113272	0.345707	0.134394	-0.0875789	0.114949	0.0172356	-0.104326	-0.170214	-0.136894
At3g05200	-0.155523	0.173259	0.0182134	0.050212	0.113047	0.0819713	-0.0390552	-0.149097	-0.093027
At3g06350	-0.0913203	0.237693	0.0825445	0.0292866	-0.00488451	0.0123026	-0.0410469	-0.136561	-0.0880139
At3g10800	-0.038489	0.0735225	0.0186037	0.0624579	0.0160569	0.0394439	-0.0411383	-0.0733186	-0.057139
At3g13650	-0.0167352	0.317341	0.159951	0.282359	0.520562	0.406371	-0.744189	-0.376818	-0.548841
At3g23800	0.120449	0.441681	0.289988	-0.0219298	0.575766	0.307652	-0.53486	-0.607852	-0.570894
At3g44630	0.063402	0.250343	0.159898	0.00601466	0.301212	0.16115	-0.464436	-0.168623	-0.308961
At3g45310	-0.03146	0.118969	0.0457146	0.140078	0.10967	0.124954	-0.196024	-0.142757	-0.169145
At3g45970	-0.149974	0.246032	0.0615741	0.232708	0.374262	0.30522	-0.565012	-0.157751	-0.347058
At3g54640	-0.145941	0.0983603	-0.018625	0.0844863	0.197706	0.142206	-0.121336	-0.11746	-0.119397
At3g56090	0.052563	0.148417	0.101286	-0.0626151	0.225947	0.0888685	-0.0932376	-0.278386	-0.182843
At3g57070	0.00273132	0.329821	0.175526	0.0460281	0.140705	0.0941429	-0.333487	-0.193612	-0.261855
At3g58530	-0.186699	0.340861	0.101062	0.0596117	0.261527	0.164099	-0.0304819	-0.474502	-0.235477
At3g58680	-0.0364909	0.0968795	0.031735	0.0203033	0.0702282	0.0454822	-0.11078	-0.0415883	-0.0757689
At3g60390	-0.310884	0.389335	0.0812968	0.398169	0.192125	0.298822	-0.290866	-0.409186	-0.348813
At4g04770	-0.0133181	0.231662	0.114366	-0.150167	0.238274	0.0570869	-0.204795	-0.11428	-0.158828
At4g08500	-0.317742	0.315831	0.0335483	0.0956091	0.135548	0.115717	-0.0733672	-0.179626	-0.125518
At4g12390	-0.0222652	0.299276	0.147445	0.100039	0.244069	0.173851	-0.325102	-0.303202	-0.314111
At4g12720	-0.250493	0.348676	0.0799764	0.235667	0.484008	0.365175	-0.707075	-0.152583	-0.403351
At4g15820	0.00280619	0.108697	0.0567231	0.0636096	0.338048	0.207345	-0.202176	-0.316735	-0.258319
At4g17190	-0.101146	0.19562	0.0548543	0.322717	0.111757	0.22109	-0.260525	-0.276084	-0.268283
At4g21830	0.264209	0.491791	0.382483	0.00378142	0.480014	0.261459	-0.677255	-0.579126	-0.627356
At4g21850	-0.119477	0.445711	0.190618	0.306284	0.594954	0.457827	-0.986789	-0.291481	-0.597647
At4g23690	0.0179249	0.293879	0.16249	-0.0652288	0.298119	0.127854	-0.327329	-0.229911	-0.277798
At4g24620	-0.0370684	0.269137	0.124144	0.167732	0.0431385	0.10678	-0.351346	-0.101498	-0.22102
At4g26670	0.0677514	0.249136	0.161293	-0.110354	0.276544	0.0960255	-0.133976	-0.362637	-0.243781
At4g27440	-0.109323	0.234005	0.07253	-0.0369947	0.222731	0.0987046	-0.0370949	-0.287628	-0.15693
At4g29220	-0.000781642	0.149244	0.0761804	0.127452	0.12098	0.12422	-0.191412	-0.206798	-0.199084
At4g29690	-0.139941	0.609097	0.282654	-0.0272643	0.616293	0.330106	-0.878254	-0.257777	-0.534913
At4g29720	-0.0625624	0.221528	0.086464	0.19292	0.130826	0.162207	-0.210211	-0.277639	-0.243531
At4g30210	-0.051171	0.11706	0.0353954	-0.0181858	0.207141	0.0988725	-0.228459	-0.0331509	-0.127502
At4g34950	-0.0355051	0.40433	0.201109	-0.0876682	0.433255	0.196179	-0.581841	-0.169099	-0.36076
At4g39200	0.0238292	0.252798	0.142851	-0.097255	0.356158	0.147191	-0.406309	-0.147923	-0.27134
At4g39330	0.03833	0.194363	0.118455	0.0929898	0.205766	0.150479	-0.230442	-0.303454	-0.266486
At5g01810	0.0906611	0.237597	0.165999	-0.00797118	0.459487	0.244609	-0.498198	-0.297709	-0.394474
At5g05960	-0.00688002	0.215079	0.108364	0.056092	0.153087	0.105405	-0.358945	-0.0667431	-0.205459
At5g06760	-0.206707	1.80049	1.12098	-0.424298	0.778793	0.299184	-1.15012	-1.09568	-1.12264
At5g07460	0.0034559	0.188794	0.099099	-0.0876066	0.493715	0.232138	-0.464273	-0.160768	-0.304554
At5g08260	-0.151091	0.273606	0.076829	0.0315132	0.166111	0.100381	-0.184767	-0.146883	-0.1657
Expression Pattern 19, 94 orfs
At1g04400	-0.166337	0.0151093	-0.0727632	0.156116	-0.0662182	0.0492279	0.132129	-0.0781029	0.0308392
At1g05560	-0.664938	-0.549461	-0.606044	0.728905	-0.49858	0.241952	0.808993	0.057528	0.481645
At1g07660	-0.188029	0.0364109	-0.0714488	0.171295	-0.0481448	0.065743	0.0924564	-0.0712208	0.0129381
At1g07950	-0.0398856	-0.0827647	-0.0611659	0.13386	-0.184605	-0.0166031	0.265044	-0.10551	0.0916313
At1g08370	-0.273334	-0.0733959	-0.169904	0.101236	-0.0182411	0.0427339	0.25868	-0.00199673	0.134221
At1g08880	-0.120189	-0.0741623	-0.0969913	0.0851099	0.0187933	0.0523331	0.236893	-0.155698	0.0539105
At1g09230	-0.441364	0.131725	-0.126548	0.201546	-0.429586	-0.0797791	0.702041	-0.258358	0.300324
At1g11130	-0.112464	-0.058119	-0.0850355	0.179809	-0.0474912	0.0706309	0.191071	-0.163189	0.0247877
At1g12270	-0.0502279	-0.030328	-0.0402438	0.10707	-0.115323	0.000154283	0.121791	-0.0373204	0.0444277
At1g17410	-0.312109	0.0143915	-0.139642	0.0143915	0.175497	0.0971914	0.517965	-0.473473	0.105788
At1g25250	-0.546871	-0.041636	-0.272249	0.323361	-0.00388103	0.168998	0.853549	-0.74618	0.264909
At1g28350	-0.0580675	-0.0580675	-0.0580675	-0.0364725	-0.0681445	-0.0522215	0.49531	-0.31176	0.14749
At1g32050	-0.153615	-0.0600856	-0.106093	0.0916649	-0.0940288	0.00180403	0.172844	0.0397021	0.107808
At1g43900	-0.109673	-0.167972	-0.138528	0.0968646	-0.0903249	0.00630373	0.377237	-0.122717	0.148809
At1g48900	-0.0443299	-0.12038	-0.0818541	0.0946691	-0.0525849	0.0229204	0.239997	-0.126704	0.0682662
At1g49720	-0.353699	0.123912	-0.0952184	0.250463	-0.31334	-0.00407055	0.542008	-0.323324	0.17327
At1g49740	-0.229009	0.0813314	-0.0655102	0.121111	-0.271961	-0.0620793	0.318277	-0.0416631	0.149503
At1g49980	-0.18923	-0.0136585	-0.0987749	0.122478	-0.0287652	0.0488372	0.218363	-0.118841	0.0595908
At1g50420	-0.235436	0.0513393	-0.0849346	0.109882	-0.118146	0.000368224	0.267946	-0.0907401	0.099722
At1g59760	-0.360237	0.125482	-0.0970326	0.177011	-0.0543137	0.0659804	0.388516	-0.321978	0.0765719
At1g60650	-0.254054	0.0635871	-0.0865088	0.271182	-0.0770112	0.107565	0.137244	-0.158805	-0.00320011
At1g64970	-0.429388	-0.118186	-0.265412	0.179129	-0.0968126	0.0477458	0.418114	0.0284234	0.236386
At1g65440	-0.516083	-0.116959	-0.302763	0.575881	-0.181549	0.246312	0.422662	-0.251938	0.124438
At1g68060	-0.291171	-0.00270213	-0.139739	0.301374	-0.337527	0.0170056	0.349716	-0.0574192	0.160463
At1g72180	-0.0703991	0.0698983	0.00145457	0.0190627	-0.0234068	-0.00201586	0.24015	-0.250378	0.0156343
At1g75660	-0.0919213	0.05686	-0.0156135	0.134264	-0.118756	0.0132938	0.0856023	-0.0724625	0.00873333
At1g78900	-0.0709079	-0.00253137	-0.0363143	0.0122325	0.042318	0.0273539	0.210816	-0.202063	0.0190961
At1g79650	-0.199436	-0.0628738	-0.12954	-0.0318136	-0.061305	-0.0464839	0.361162	-0.0150113	0.185301
At1g80930	-0.0251066	-0.20419	-0.111871	0.147966	-0.0634181	0.0461414	0.222233	-0.0874416	0.0756886
At2g02850	-0.194029	-0.0956255	-0.143989	0.203935	-0.0837842	0.0672358	0.745308	-0.69653	0.19748
At2g05170	-0.101892	-0.0611223	-0.081363	0.155516	-0.134418	0.01782	0.141353	-0.00562747	0.0697338
At2g06510	-0.095135	-0.125192	-0.110085	-0.0368359	-0.095135	-0.0656913	0.504625	-0.179348	0.202798
At2g18170	-0.179805	0.0659177	-0.0517185	-0.0879171	-0.0213979	-0.0542743	0.366507	-0.163159	0.125847
At2g24490	-0.223055	-0.0410576	-0.129189	0.333338	-0.15539	0.109571	0.268297	-0.210983	0.048469
At2g25910	-0.0911067	-0.0115359	-0.0507729	0.0185363	0.00286219	0.0107205	0.153719	-0.0758965	0.0434744
At2g33150	-0.120542	-0.0191501	-0.0689557	0.13001	-0.0700763	0.0334326	0.0918261	-0.0156387	0.0390937
At2g42210	-0.122088	-0.104827	-0.113431	0.215106	-0.128385	0.0535591	0.28823	-0.166761	0.0785969
At2g45200	-0.33694	-0.211409	-0.272809	0.310694	-0.0414836	0.145324	0.413988	-0.16194	0.154575
At2g46110	-0.127834	0.095043	-0.0120956	0.140847	-0.240768	-0.037379	0.407634	-0.316121	0.0906738
At2g46505	-0.0509289	0.0116513	-0.0192993	-0.00446775	-0.0451458	-0.0246637	0.17856	-0.0942839	0.0485785
At2g46580	-0.0493371	0.0369075	-0.00557057	0.0196021	-0.00616089	0.00677808	0.108498	-0.112804	0.00208648
At3g01040	-0.0492004	-0.308492	-0.173029	0.0725089	-0.0408968	0.0169202	0.466829	-0.168499	0.183859
At3g01790	-0.0879082	-0.0335769	-0.0604867	0.0396663	-0.0710195	-0.0146154	0.12845	0.0228668	0.076624
At3g04110	-0.124885	-0.168138	-0.14635	0.219991	-0.155647	0.0443631	0.219991	-0.00240125	0.113076
At3g12020	-0.336285	-0.117513	-0.222756	0.185442	-0.16168	0.0222957	0.549643	-0.157948	0.238801
At3g23610	-0.0398293	-0.123807	-0.0812073	0.0556936	0.00248146	0.0293326	0.359016	-0.277328	0.0756483
At3g26170	-0.17886	-0.173502	-0.176178	0.271637	-0.189637	0.0593581	0.33222	-0.084074	0.139036
[truncated: 3,144 more rows]
